# Supplementary material for: Synthesis, odor characteristics and biological evaluation of N-substituted pyrrolyl chalcones
Source: Royal Society of Chemistry journal article supplement (doi:10.1039/d2ob01561g), 2022-01-01
Supplement: d2ob01561g1.pdf [file d2ob01561g1.pdf]

## Supporting Information

# Synthesis, Odor Characteristics and Biological Evaluation of *N*-Substituted Pyrrolyl Chalcones

Jingyi Hu, Xiaoming Ji, Fangyao Su, Qianrui Zhao, Ganlin Zhang, Mingqin Zhao \*  
and Miao Lai \*

*Flavors and Fragrance Engineering & Technology Research Center of Henan  
Province, College of Tobacco Science, Henan Agricultural University, Zhengzhou  
450002, P.R. China*

[laimiao@henau.edu.cn](mailto:laimiao@henau.edu.cn)

## Table of Contents

|                                                            |           |
|------------------------------------------------------------|-----------|
| <b>1. General information .....</b>                        | <b>S1</b> |
| <b>2. Optimization Details .....</b>                       | <b>S2</b> |
| <b>3. General procedure for the product synthesis.....</b> | <b>S2</b> |
| <b>4. Characterization data .....</b>                      | <b>S3</b> |

|                                                                                                                    |            |
|--------------------------------------------------------------------------------------------------------------------|------------|
| <b>5. References .....</b>                                                                                         | <b>S15</b> |
| <b>6. Copies of <math>^1\text{H}</math> NMR and <math>^{13}\text{C}</math> NMR spectra for all compounds .....</b> | <b>S16</b> |

## 1. General information

All reactions were carried out under air atmosphere in a dried tube. *t*-BuOK (99.9%) was purchased from Shanghai Meryer Chemical Technology Co., Ltd. All the reagents were obtained commercially and used without further purification. Silica gel was purchased from Qing Dao Hai Yang Chemical Industry Co. Analytical thin layer chromatography (TLC) was performed on precoated silica gel F<sub>254</sub> plates. Compounds were visualized by irradiation with UV light (254 nm).

### Analytical information:

<sup>1</sup>H NMR and <sup>13</sup>C NMR spectra data were recorded by a BRUKER AVANCE III 400 MHz spectrometer (<sup>1</sup>H 400 MHz, <sup>13</sup>C 100 MHz), using CDCl<sub>3</sub> as the solvent with tetramethylsilane (TMS) as the internal standard at room temperature. <sup>1</sup>H NMR spectral data are given as chemical shifts in ppm followed by multiplicity (s- singlet; d- doublet; t- triplet; q- quartet; m- multiplet), number of protons and coupling constants. <sup>13</sup>C NMR chemical shifts are expressed in ppm. Infrared spectra were recorded with a Thermo Scientific Nicolet 6700 FT-IR Spectrometer. HRMS data were obtained using AB SCIEX Triple TOF 5600+ high resolution mass spectrometer (USA). The products listed below were determined by <sup>1</sup>H and <sup>13</sup>C NMR spectra. Melting points were determined using melting point X-4 (Gongyi Kerui) apparatus.

GC-MS-O analysis was carried out using an Agilent 7890B-5977A with a capillary column DB-WAX (30 m × 0.25 mm × 0.25 μm) and a sniffing port (Gerstel OP3, Germany). The analytical conditions were as follows: the oven temperature was programmed from 50°C to 280°C at a rate of 10°C/min, then held at 280°C for 5 min; carrier gas, helium; flow rate, 1.6 mL/min; electron ionization, 70 eV; ion source temperature, 230°C. The column effluent was divided (ratio 1:1) between the MSD detector and the sniffing port through one Y-shaped glass splitter. The effluent to the sniffing port was enclosed with a stream of humidified air of 16 mL/min and transferred to the glass detection cone by one length of capillary column at the temperature of 250°C. All the samples with a concentration of 5 wt.% in CH<sub>2</sub>Cl<sub>2</sub>, and the injection volume was 1.0 μL.

The antifungal characteristics of the target compounds were discovered using the agar well diffusion method. The medium was a mixture of filtered potato juice boiled, glucose and agar. The produced compounds were diluted in a water mixture with 20% DMSO in it. The solution of each component was added to sterilized potato dextrose agar and the final obtained concentration was 0.5 mg/mL. The mycelia of fungi were added to the test plate once the mixture had cooled, where they were cultured for 3-7

days at 25 °C. When the fungal mycelia approached the edges of the control plate, the width of the zone that inhibits bacterial growth was measured (without the additional compounds). The findings of three different investigations were averaged to get the inhibitory index.

TG-DTG and differential scanning calorimeter (DSC) curves of the target compounds were detected by a simultaneous thermal analyzer (STA 449 F3, Netzsch, Germany). Every compound was preserved about 5 mg, and spectrally pure Al<sub>2</sub>O<sub>3</sub> served as the standard. Each experiment was run in an air-conditioned environment at a flow rate of 60 mL min<sup>-1</sup> and heated at a rate of 10 °C min<sup>-1</sup> between 30 and 400 °C.

## 2. Optimization Details

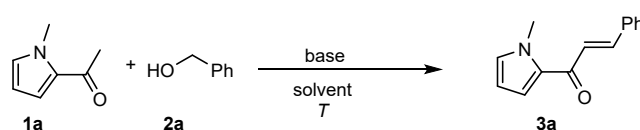

Under air atmosphere, 2-acetyl-1-methylpyrrole **1a** (0.2 mmol), benzyl alcohol **2a** (2.0 equiv.) and base (1.0 equiv.) were charged into a 10 mL sealable tube equipped with a magnetic stirring bar. After the addition of toluene (1.0 mL), the resulting mixture was stirred at 80 °C for 24 h in oil bath. After cooling down, the reaction mixture was diluted with 10 mL ethyl acetate and washed with 10 mL brine. The aqueous layer was extracted twice with ethyl acetate. The combined organic phase was dried over anhydrous Na<sub>2</sub>SO<sub>4</sub>, filtered and concentrated in *vacuo*. The residue was purified by flash column chromatography on silica gel (eluent: petroleum ether-EtOAc) to give the pure product **3a**.

## 3. General procedure for the C-olefination

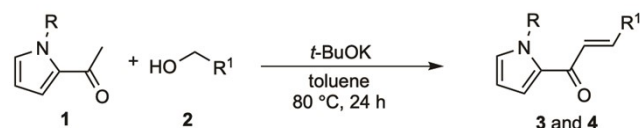

### Scheme S1. Olefination of *N*-substituted-acetyl-pyrrole with alcohols

Under air atmosphere, *N*-substituted-acetyl-pyrrole **1** (0.2 mmol), corresponding alcohols **2** (0.4 mmol, 2.0 equiv.) and *t*-BuOK (0.2 mmol, 1.0 equiv.) were charged into a 10 mL sealable tube equipped with a magnetic stirring bar. After the addition of toluene (1.0 mL), the resulting mixture was stirred at 80 °C for 24 h in oil bath. After



108.30, 37.83. CAS Number: 22563-50-4.

**(E)-1-(1-methyl-1H-pyrrol-2-yl)-3-(p-tolyl)prop-2-en-1-one (3b)**<sup>1</sup>

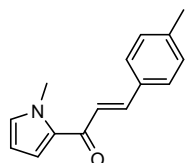

Isolated as a white solid, 39 mg, 86% yield; <sup>1</sup>H NMR (400 MHz, CDCl<sub>3</sub>) δ 7.71 (d, *J* = 15.6 Hz, 1H), 7.51 (d, *J* = 8.0 Hz, 2H), 7.36 (d, *J* = 15.6 Hz, 1H), 7.21 (d, *J* = 7.9 Hz, 2H), 7.11 (dd, *J* = 4.0, 1.4 Hz, 1H), 6.87 (s, 1H), 6.19 (dd, *J* = 4.0, 2.5 Hz, 1H), 4.03 (s, 3H), 2.38 (s, 3H); <sup>13</sup>C NMR (100 MHz, CDCl<sub>3</sub>) δ 179.93, 141.51, 140.32, 132.52, 132.08, 131.56, 129.60, 128.20, 122.63, 119.10, 108.21, 37.82, 21.49. CAS Number: 1335195-32-8.

**(E)-3-(4-ethylphenyl)-1-(1-methyl-1H-pyrrol-2-yl)prop-2-en-1-one (3c)**

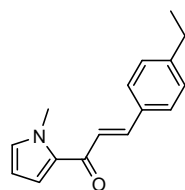

Isolated as a yellow liquid, 34 mg, 71% yield; <sup>1</sup>H NMR (400 MHz, CDCl<sub>3</sub>) δ 7.72 (d, *J* = 15.6 Hz, 1H), 7.54 (d, *J* = 8.1 Hz, 2H), 7.37 (d, *J* = 15.6 Hz, 1H), 7.24 (t, *J* = 6.5 Hz, 2H), 7.11 (dd, *J* = 4.1, 1.6 Hz, 1H), 6.87 (s, 1H), 6.19 (dd, *J* = 4.1, 2.5 Hz, 1H), 4.03 (s, 3H), 2.68 (q, *J* = 7.6 Hz, 2H), 1.25 (t, *J* = 7.6 Hz, 3H); <sup>13</sup>C NMR (100 MHz, CDCl<sub>3</sub>) δ 179.95, 146.65, 141.54, 132.77, 132.08, 131.57, 128.41, 128.29, 122.69, 119.11, 108.21, 37.81, 28.83, 15.39. IR (KBr)  $\nu_{\max}$  3429, 3108, 2963, 2928, 1647, 1592, 1526, 1511, 987, and 736 cm<sup>-1</sup>; HRMS (ESI) calcd. for C<sub>16</sub>H<sub>18</sub>NO: [M+H]<sup>+</sup>: 240.1388, found: 240.1388.

**(E)-3-(4-isopropylphenyl)-1-(1-methyl-1H-pyrrol-2-yl)prop-2-en-1-one (3d)**

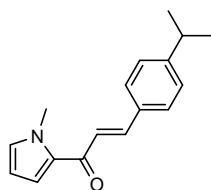

Isolated as a yellow liquid, 33 mg, 65% yield; <sup>1</sup>H NMR (400 MHz, CDCl<sub>3</sub>) δ 7.72 (d,

$J = 15.6$  Hz, 1H), 7.55 (d,  $J = 8.2$  Hz, 2H), 7.37 (d,  $J = 15.6$  Hz, 1H), 7.31 – 7.21 (m, 2H), 7.11 (dd,  $J = 4.1, 1.6$  Hz, 1H), 6.87 (s, 1H), 6.19 (dd,  $J = 4.1, 2.5$  Hz, 1H), 4.03 (s, 3H), 2.94 (dt,  $J = 13.8, 6.9$  Hz, 1H), 1.28 (s, 6H);  $^{13}\text{C}$  NMR (100 MHz,  $\text{CDCl}_3$ )  $\delta$  179.95, 151.24, 141.53, 132.92, 132.09, 131.56, 128.31, 126.98, 122.73, 119.11, 108.21, 37.82, 34.10, 23.82. IR (KBr)  $\nu_{\text{max}}$  3419, 3116, 2959, 2926, 1648, 1593, 1526, 1064, and 735  $\text{cm}^{-1}$ ; HRMS (ESI) calcd. for  $\text{C}_{17}\text{H}_{20}\text{NO}$ :  $[\text{M}+\text{H}]^+$ : 254.1545, found: 254.1544.

**(E)-3-(4-methoxyphenyl)-1-(1-methyl-1H-pyrrol-2-yl)prop-2-en-1-one (3e)**

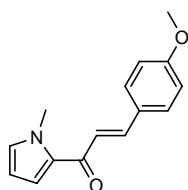

Isolated as a light yellow solid, m. p. 61 – 62  $^{\circ}\text{C}$ , 40 mg, 82% yield;  $^1\text{H}$  NMR (400 MHz,  $\text{CDCl}_3$ )  $\delta$  7.70 (d,  $J = 15.6$  Hz, 1H), 7.56 (d,  $J = 8.7$  Hz, 2H), 7.29 (d,  $J = 15.6$  Hz, 1H), 7.09 (dd,  $J = 4.0, 1.4$  Hz, 1H), 6.92 (d,  $J = 8.7$  Hz, 2H), 6.86 (s, 1H), 6.19 (dd,  $J = 4.0, 2.5$  Hz, 1H), 4.02 (s, 3H), 3.84 (s, 3H);  $^{13}\text{C}$  NMR (100 MHz,  $\text{CDCl}_3$ )  $\delta$  179.98, 161.18, 141.23, 132.12, 131.44, 129.85, 127.99, 121.36, 118.91, 114.31, 108.16, 55.39, 37.81. IR (KBr)  $\nu_{\text{max}}$  3445, 3107, 2969, 1646, 1588, 1572, 1526, 1065, 1047, and 732  $\text{cm}^{-1}$ ; HRMS (ESI) calcd. for  $\text{C}_{15}\text{H}_{16}\text{NO}_2$ :  $[\text{M}+\text{H}]^+$ : 242.1181, found: 242.1180.

**(E)-3-([1,1'-biphenyl]-4-yl)-1-(1-methyl-1H-pyrrol-2-yl)prop-2-en-1-one (3f)**

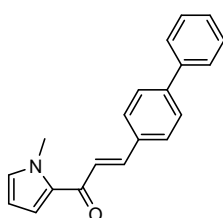

Isolated as a light yellow liquid, 26 mg, 45% yield;  $^1\text{H}$  NMR (400 MHz,  $\text{CDCl}_3$ )  $\delta$  7.78 (d,  $J = 15.6$  Hz, 1H), 7.69 (d,  $J = 8.2$  Hz, 2H), 7.66 – 7.59 (m, 4H), 7.50 – 7.41 (m, 3H), 7.37 (t,  $J = 7.2$  Hz, 1H), 7.14 (d,  $J = 2.9$  Hz, 1H), 6.89 (s, 1H), 6.21 (dd,  $J = 3.4, 2.6$  Hz, 1H), 4.04 (s, 3H);  $^{13}\text{C}$  NMR (100 MHz,  $\text{CDCl}_3$ )  $\delta$  179.71, 142.70, 141.01, 140.32, 134.26, 132.07, 131.74, 128.90, 128.70, 127.77, 127.53, 127.06, 123.51, 119.28, 108.31, 37.85. IR (KBr)  $\nu_{\text{max}}$  3429, 2918, 1649, 1647, 1592, 1526, 1065, 987, and 740  $\text{cm}^{-1}$ ; HRMS (ESI) calcd. for  $\text{C}_{20}\text{H}_{18}\text{NO}$ :  $[\text{M}+\text{H}]^+$ : 288.1388, found: 288.1387.

**(E)-3-(4-chlorophenyl)-1-(1-methyl-1H-pyrrol-2-yl)prop-2-en-1-one (3g)**<sup>1</sup>

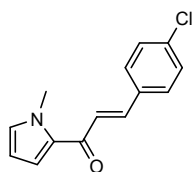

Isolated as a light yellow solid, 26 mg, 53% yield; <sup>1</sup>H NMR (400 MHz, CDCl<sub>3</sub>) δ 7.67 (d, *J* = 15.6 Hz, 1H), 7.54 (d, *J* = 8.4 Hz, 2H), 7.37 (dd, *J* = 12.0, 3.5 Hz, 3H), 7.11 (dd, *J* = 4.0, 1.4 Hz, 1H), 6.89 (s, 1H), 6.20 (dd, *J* = 4.0, 2.5 Hz, 1H), 4.03 (s, 3H); <sup>13</sup>C NMR (100 MHz, CDCl<sub>3</sub>) δ 179.36, 139.98, 135.73, 133.78, 131.92, 129.33, 129.11, 124.08, 119.41, 108.38, 37.83. CAS Number: 1335195-29-3.

**(E)-1-(1-methyl-1H-pyrrol-2-yl)-3-(m-tolyl)prop-2-en-1-one (3h)**<sup>1</sup>

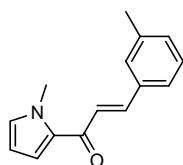

Isolated as a white solid, 34 mg, 76% yield; <sup>1</sup>H NMR (400 MHz, CDCl<sub>3</sub>) δ 7.71 (d, *J* = 15.6 Hz, 1H), 7.48 – 7.35 (m, 3H), 7.28 (dd, *J* = 14.9, 6.9 Hz, 1H), 7.19 (d, *J* = 7.4 Hz, 1H), 7.12 (d, *J* = 2.7 Hz, 1H), 6.87 (s, 1H), 6.19 (dd, *J* = 3.8, 2.5 Hz, 1H), 4.03 (s, 3H), 2.39 (s, 3H); <sup>13</sup>C NMR (100 MHz, CDCl<sub>3</sub>) δ 179.83, 141.65, 138.49, 135.22, 132.04, 131.68, 130.80, 128.79, 128.75, 125.45, 123.42, 119.27, 108.26, 37.83, 21.38. CAS Number: 1335195-31-7.

**(E)-3-(3-bromophenyl)-1-(1-methyl-1H-pyrrol-2-yl)prop-2-en-1-one (3i)**<sup>1</sup>

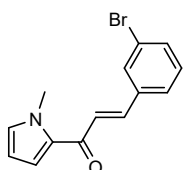

Isolated as a white solid, 36 mg, 62% yield; <sup>1</sup>H NMR (400 MHz, CDCl<sub>3</sub>) δ 7.75 (s, 1H), 7.63 (d, *J* = 15.6 Hz, 1H), 7.57 – 7.45 (m, 2H), 7.37 (d, *J* = 15.6 Hz, 1H), 7.27 (dd, *J* = 9.6, 6.1 Hz, 1H), 7.12 (d, *J* = 2.8 Hz, 1H), 6.89 (s, 1H), 6.21 (dd, *J* = 3.7, 2.5 Hz, 1H), 4.03 (s, 3H); <sup>13</sup>C NMR (100 MHz, CDCl<sub>3</sub>) δ 179.14, 139.65, 137.44, 132.64, 132.05, 131.86, 130.58, 130.36, 127.00, 124.91, 122.99, 119.63, 108.45, 37.85. CAS Number: 1610603-17-2.



**(E)-3-(3-fluorophenyl)-1-(1-methyl-1H-pyrrol-2-yl)prop-2-en-1-one (3j)**

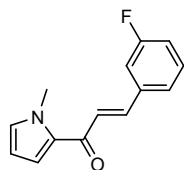

Isolated as a yellow solid, m. p. 52 – 53 °C, 23 mg, 51% yield; <sup>1</sup>H NMR (400 MHz, CDCl<sub>3</sub>) δ 7.68 (d, *J* = 15.6 Hz, 1H), 7.38 (d, *J* = 14.7 Hz, 3H), 7.31 (d, *J* = 9.6 Hz, 1H), 7.12 (d, *J* = 2.9 Hz, 1H), 7.10 – 7.02 (m, 1H), 6.89 (s, 1H), 6.26 – 6.17 (m, 1H), 4.03 (s, 3H); <sup>13</sup>C NMR (100 MHz, CDCl<sub>3</sub>) δ 179.25, 163.05 (d, *J* = 245.0 Hz), 140.01(d, *J* = 2.5Hz), 137.58(d, *J* = 7.8 Hz), 132.01, 131.88, 130.38(d, *J* = 8.2 Hz), 124.82, 124.25(d, *J* = 2.8 Hz), 119.56, 116.72(d, *J* = 21.2 Hz)114.25(d, *J* = 21.8 Hz), 108.43, 37.84. IR (KBr)  $\nu_{\max}$  3419, 3130, 2922, 1649, 1595, 1525, 1067, 988, and 748 cm<sup>-1</sup>; HRMS (ESI) calcd. for C<sub>14</sub>H<sub>13</sub>FNO: [M+H]<sup>+</sup>: 230.0981, found: 230.0980.

**(E)-1-(1-methyl-1H-pyrrol-2-yl)-3-(3-(trifluoromethyl)phenyl)prop-2-en-1-one (3k)**

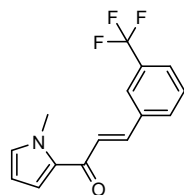

Isolated as a light yellow solid, m. p. 60 – 61 °C, 19 mg, 34% yield; <sup>1</sup>H NMR (400 MHz, CDCl<sub>3</sub>) δ 7.85 (s, 1H), 7.76 (d, *J* = 8.4 Hz, 2H), 7.62 (d, *J* = 7.6 Hz, 1H), 7.53 (t, *J* = 7.7 Hz, 1H), 7.44 (d, *J* = 15.6 Hz, 1H), 7.15 (d, *J* = 2.8 Hz, 1H), 6.91 (s, 1H), 6.28 – 6.17 (m, 1H), 4.04 (s, 3H); <sup>13</sup>C NMR (100 MHz, CDCl<sub>3</sub>) δ 179.02, 139.56, 136.10, 132.14, 131.82, 131.38(q, *J* = 32.1 Hz), 131.38, 129.39, 126.23(q, *J* = 3.7 Hz), 125.31, 124.41(q, *J* = 3.7 Hz), 123.90 (q, *J* = 270.8 Hz), 119.73, 108.49, 37.85. IR (KBr)  $\nu_{\max}$  3433, 2922, 1649, 1595, 1525, 1046, 981, 926, and 741 cm<sup>-1</sup>; HRMS (ESI) calcd. for C<sub>15</sub>H<sub>13</sub>F<sub>3</sub>NO: [M+H]<sup>+</sup>: 280.0949, found: 280.0948.

**(E)-1-(1-methyl-1H-pyrrol-2-yl)-3-(o-tolyl)prop-2-en-1-one (3l) <sup>2</sup>**

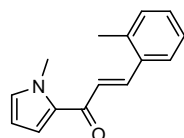

Isolated as a yellow solid, 31 mg, 69% yield;  $^1\text{H}$  NMR (400 MHz,  $\text{CDCl}_3$ )  $\delta$  8.03 (d,  $J = 15.5$  Hz, 1H), 7.66 (d,  $J = 7.6$  Hz, 1H), 7.32 (d,  $J = 15.5$  Hz, 1H), 7.30 – 7.19 (m, 3H), 7.11 (dd,  $J = 4.0, 1.4$  Hz, 1H), 6.88 (s, 1H), 6.20 (dd,  $J = 4.0, 2.5$  Hz, 1H), 4.04 (s, 3H), 2.47 (s, 3H);  $^{13}\text{C}$  NMR (100 MHz,  $\text{CDCl}_3$ )  $\delta$  179.84, 139.14, 137.99, 134.30, 132.02, 131.75, 130.81, 129.69, 126.28, 126.25, 124.75, 119.34, 108.30, 37.85, 19.88. CAS Number: 1335195-30-6.

**(E)-3-(2,6-dimethylphenyl)-1-(1-methyl-1H-pyrrol-2-yl)prop-2-en-1-one (3m)**

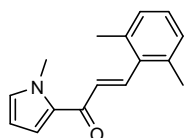

Isolated as a light yellow liquid, 19 mg, 40% yield;  $^1\text{H}$  NMR (400 MHz,  $\text{CDCl}_3$ )  $\delta$  7.86 (d,  $J = 16.0$  Hz, 1H), 7.14 (dd,  $J = 8.7, 6.0$  Hz, 1H), 7.08 (d,  $J = 6.9$  Hz, 2H), 7.03 (d,  $J = 16.0$  Hz, 2H), 6.89 (s, 1H), 6.18 (dd,  $J = 3.9, 2.5$  Hz, 1H), 4.05 (s, 3H), 2.39 (s, 6H);  $^{13}\text{C}$  NMR (100 MHz,  $\text{CDCl}_3$ )  $\delta$  179.68, 139.93, 136.76, 135.13, 131.93, 131.82, 129.44, 128.18, 127.99, 119.46, 108.35, 37.85, 21.13. IR (KBr)  $\nu_{\text{max}}$  3429, 3130, 2924, 1648, 1602, 1526, 1065, 984, and 736  $\text{cm}^{-1}$ ; HRMS (ESI) calcd. for  $\text{C}_{16}\text{H}_{18}\text{NO}$ :  $[\text{M}+\text{H}]^+$ : 240.1388, found: 240.1387.

**(E)-3-(benzo[d][1,3]dioxol-5-yl)-1-(1-methyl-1H-pyrrol-2-yl)prop-2-en-1-one (3n)<sup>3</sup>**

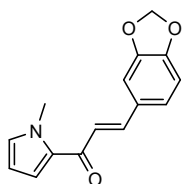

Isolated as a light yellow solid, 33 mg, 65% yield;  $^1\text{H}$  NMR (400 MHz,  $\text{CDCl}_3$ )  $\delta$  7.65 (d,  $J = 15.5$  Hz, 1H), 7.24 (d,  $J = 15.7$  Hz, 1H), 7.13 (s, 1H), 7.08 (d,  $J = 5.8$  Hz, 2H), 6.86 (s, 1H), 6.83 (d,  $J = 8.0$  Hz, 1H), 6.19 (s, 1H), 6.01 (s, 2H), 4.02 (s, 3H);  $^{13}\text{C}$  NMR (100 MHz,  $\text{CDCl}_3$ )  $\delta$  179.77, 149.35, 148.29, 141.26, 132.06, 131.54, 129.72, 124.54, 121.73, 118.99, 108.59, 108.21, 106.61, 101.51, 37.81. CAS Number: 1638512-92-1. **(E)-1-(1-methyl-1H-pyrrol-2-yl)-3-(naphthalen-2-yl)prop-2-en-1-one (3o)<sup>2</sup>**

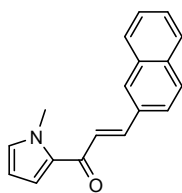

Isolated as a light yellow solid, 37 mg, 70% yield;  $^1\text{H}$  NMR (400 MHz,  $\text{CDCl}_3$ )  $\delta$  7.99 (s, 1H), 7.93 – 7.80 (m, 4H), 7.76 (dd,  $J = 8.6, 1.4$  Hz, 1H), 7.56 – 7.46 (m, 3H), 7.16 (dd,  $J = 4.1, 1.5$  Hz, 1H), 6.88 (s, 1H), 6.21 (dd,  $J = 4.0, 2.5$  Hz, 1H), 4.04 (s, 3H);  $^{13}\text{C}$  NMR (100 MHz,  $\text{CDCl}_3$ )  $\delta$  179.72, 141.54, 134.14, 133.45, 132.77, 132.09, 131.76, 129.93, 128.58, 128.55, 127.79, 127.05, 126.65, 123.85, 123.81, 119.33, 108.32, 37.86. CAS Number: 1335195-34-0.

**(E)-3-(furan-2-yl)-1-(1-methyl-1H-pyrrol-2-yl)prop-2-en-1-one (3p)**

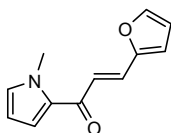

Isolated as a yellow solid, m. p. 78 – 79 °C, 32 mg, 80% yield;  $^1\text{H}$  NMR (400 MHz,  $\text{CDCl}_3$ )  $\delta$  7.49 (dd,  $J = 8.4, 6.9$  Hz, 2H), 7.31 (d,  $J = 15.4$  Hz, 1H), 7.11 (dd,  $J = 4.1, 1.6$  Hz, 1H), 6.90 – 6.83 (m, 1H), 6.63 (d,  $J = 3.4$  Hz, 1H), 6.48 (dd,  $J = 3.4, 1.8$  Hz, 1H), 6.19 (dd,  $J = 4.1, 2.5$  Hz, 1H), 4.02 (s, 3H);  $^{13}\text{C}$  NMR (100 MHz,  $\text{CDCl}_3$ )  $\delta$  179.44, 151.95, 144.27, 132.06, 131.66, 127.76, 121.41, 119.30, 114.76, 112.40, 108.29, 37.80. IR (KBr)  $\nu_{\text{max}}$  3429, 3124, 2924, 1648, 1592, 1549, 1524, 987, and 726  $\text{cm}^{-1}$ ; HRMS (ESI) calcd. for  $\text{C}_{12}\text{H}_{12}\text{NO}_2$ :  $[\text{M}+\text{H}]^+$ : 202.0868, found: 202.0867.

**(E)-3-(furan-3-yl)-1-(1-methyl-1H-pyrrol-2-yl)prop-2-en-1-one (3q)**

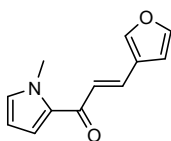

Isolated as a yellow solid, m. p. 53 – 54 °C, 16 mg, 40% yield;  $^1\text{H}$  NMR (400 MHz,  $\text{CDCl}_3$ )  $\delta$  7.69 (s, 1H), 7.62 (d,  $J = 15.5$  Hz, 1H), 7.45 (s, 1H), 7.12 (d,  $J = 15.5$  Hz, 1H), 7.07 (dd,  $J = 4.1, 1.5$  Hz, 1H), 6.86 (s, 1H), 6.68 (s, 1H), 6.18 (dd,  $J = 4.0, 2.5$  Hz, 1H), 4.02 (s, 3H);  $^{13}\text{C}$  NMR (100 MHz,  $\text{CDCl}_3$ )  $\delta$  179.73, 144.73, 144.25, 131.88, 131.57, 131.36, 123.53, 123.27, 119.06, 108.20, 107.58, 37.78. IR (KBr)  $\nu_{\text{max}}$  3420, 3126, 2923, 1652, 1598, 1557, 1526, 993, and 740  $\text{cm}^{-1}$ ; HRMS (ESI) calcd. for  $\text{C}_{12}\text{H}_{12}\text{NO}_2$ :  $[\text{M}+\text{H}]^+$ : 202.0868, found: 202.0867.

**(2E, 4E)-1-(1-methyl-1H-pyrrol-2-yl)-5-phenylpenta-2,4-dien-1-one (3r) <sup>2</sup>**

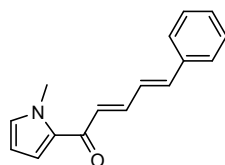

Isolated as a yellow solid, 21 mg, 45% yield; <sup>1</sup>H NMR (400 MHz, CDCl<sub>3</sub>) δ 7.58 – 7.51 (m, 1H), 7.51 – 7.46 (m, 2H), 7.36 (t, *J* = 7.4 Hz, 2H), 7.33 – 7.27 (m, 1H), 7.04 (dd, *J* = 4.0, 1.5 Hz, 1H), 7.01 – 6.91 (m, 2H), 6.86 (s, 1H), 6.18 (dd, *J* = 4.0, 2.5 Hz, 1H), 4.02 (s, 3H); <sup>13</sup>C NMR (100 MHz, CDCl<sub>3</sub>) δ 179.92, 141.47, 140.27, 136.42, 132.08, 131.55, 128.85, 128.80, 127.22, 127.12, 119.03, 108.22, 37.79. CAS Number: 1634692-31-1.

**(E)-1-(1-ethyl-1H-pyrrol-2-yl)-3-phenylprop-2-en-1-one (4a)**

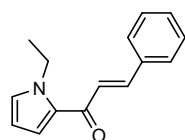

Isolated as a light yellow liquid, 34 mg, 76% yield; <sup>1</sup>H NMR (400 MHz, CDCl<sub>3</sub>) δ 7.73 (d, *J* = 15.6 Hz, 1H), 7.61 (d, *J* = 6.4 Hz, 2H), 7.40 (dd, *J* = 18.4, 10.8 Hz, 4H), 7.14 (d, *J* = 2.8 Hz, 1H), 6.95 (s, 1H), 6.28 – 6.15 (m, 1H), 4.47 (q, *J* = 7.1 Hz, 2H), 1.42 (t, *J* = 7.1 Hz, 3H); <sup>13</sup>C NMR (100 MHz, CDCl<sub>3</sub>) δ 179.30, 141.35, 135.33, 131.19, 130.25, 129.88, 128.86, 128.17, 123.83, 119.82, 108.49, 44.97, 16.99. IR (KBr)  $\nu_{\max}$  3434, 2924, 2853, 1647, 1593, 1523, 1495, 1050, and 734 cm<sup>-1</sup>; HRMS (ESI) calcd. for C<sub>15</sub>H<sub>16</sub>NO: [M+H]<sup>+</sup>: 226.1232, found: 226.1231.

**(E)-1-(1-ethyl-1H-pyrrol-2-yl)-3-(p-tolyl)prop-2-en-1-one (4b)**

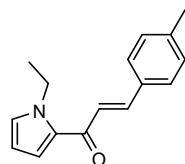

Isolated as a light yellow liquid, 46 mg, 96% yield; <sup>1</sup>H NMR (400 MHz, CDCl<sub>3</sub>) δ 7.71 (d, *J* = 15.6 Hz, 1H), 7.51 (d, *J* = 8.1 Hz, 2H), 7.38 (d, *J* = 15.6 Hz, 1H), 7.20 (d, *J* = 8.0 Hz, 2H), 7.13 (dd, *J* = 4.1, 1.6 Hz, 1H), 6.99 – 6.92 (m, 1H), 6.21 (dd, *J* = 4.1, 2.5 Hz, 1H), 4.47 (q, *J* = 7.1 Hz, 2H), 2.38 (s, 3H), 1.42 (t, *J* = 7.1 Hz, 3H); <sup>13</sup>C NMR (100 MHz, CDCl<sub>3</sub>) δ 179.49, 141.39, 140.26, 132.57, 131.25, 130.07, 129.59, 128.17,

122.83, 119.62, 108.40, 44.94, 21.49, 17.00. IR (KBr)  $\nu_{\max}$  3436, 2971, 1648, 1592, 1524, 1512, 1074, 1052, and 729  $\text{cm}^{-1}$ ; HRMS (ESI) calcd. for  $\text{C}_{16}\text{H}_{18}\text{NO}$ :  $[\text{M}+\text{H}]^+$ : 240.1388, found: 240.1388.

**(E)-1-(1-ethyl-1H-pyrrol-2-yl)-3-(4-isopropylphenyl)prop-2-en-1-one (4c)**

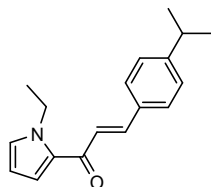

Isolated as a yellow liquid, 48 mg, 90% yield;  $^1\text{H}$  NMR (400 MHz,  $\text{CDCl}_3$ )  $\delta$  7.72 (d,  $J = 15.6$  Hz, 1H), 7.55 (d,  $J = 8.0$  Hz, 2H), 7.38 (d,  $J = 15.6$  Hz, 1H), 7.26 (d,  $J = 7.6$  Hz, 2H), 7.13 (d,  $J = 2.7$  Hz, 1H), 6.95 (s, 1H), 6.27 – 6.17 (m, 1H), 4.47 (q,  $J = 7.1$  Hz, 2H), 2.94 (dt,  $J = 13.8, 7.0$  Hz, 1H), 1.43 (t,  $J = 7.1$  Hz, 3H), 1.27 (d,  $J = 6.8$  Hz, 6H);  $^{13}\text{C}$  NMR (100 MHz,  $\text{CDCl}_3$ )  $\delta$  179.51, 151.18, 141.40, 132.97, 131.26, 130.07, 128.28, 127.15, 126.97, 122.93, 119.61, 108.40, 44.94, 34.10, 23.82, 17.00. IR (KBr)  $\nu_{\max}$  3429, 3107, 2960, 2930, 2869, 1648, 1594, 1565, 1524, 1049, and 736  $\text{cm}^{-1}$ ; HRMS (ESI) calcd. for  $\text{C}_{18}\text{H}_{22}\text{NO}$ :  $[\text{M}+\text{H}]^+$ : 268.1701, found: 268.1700.

**(E)-1-(1-ethyl-1H-pyrrol-2-yl)-3-(4-methoxyphenyl)prop-2-en-1-one (4d)**

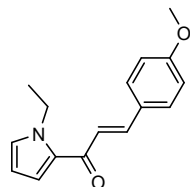

Isolated as a light yellow solid, m. p. 64 – 65  $^{\circ}\text{C}$ , 45 mg, 88% yield;  $^1\text{H}$  NMR (400 MHz,  $\text{CDCl}_3$ )  $\delta$  7.70 (d,  $J = 15.6$  Hz, 1H), 7.57 (d,  $J = 8.7$  Hz, 2H), 7.31 (d,  $J = 15.6$  Hz, 1H), 7.12 (dd,  $J = 4.1, 1.6$  Hz, 1H), 6.93 (dd,  $J = 8.9, 5.5$  Hz, 3H), 6.20 (dd,  $J = 4.0, 2.5$  Hz, 1H), 4.47 (q,  $J = 7.1$  Hz, 2H), 3.84 (s, 3H), 1.42 (t,  $J = 7.1$  Hz, 3H);  $^{13}\text{C}$  NMR (100 MHz,  $\text{CDCl}_3$ )  $\delta$  179.55, 161.14, 141.10, 131.29, 129.93, 129.81, 128.05, 121.57, 119.40, 114.30, 108.34, 55.38, 44.93, 17.01. IR (KBr)  $\nu_{\max}$  3435, 2930, 1645, 1588, 1572, 1524, 1510, 1051, and 733  $\text{cm}^{-1}$ ; HRMS (ESI) calcd. for  $\text{C}_{16}\text{H}_{18}\text{NO}_2$ :  $[\text{M}+\text{H}]^+$ : 256.1338, found: 256.1337.

**(E)-3-(4-bromophenyl)-1-(1-ethyl-1H-pyrrol-2-yl)prop-2-en-1-one (4e)**

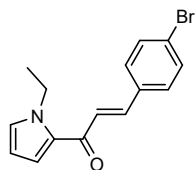

Isolated as a yellow solid, m. p. 63 – 64 °C, 37 mg, 61% yield;  $^1\text{H}$  NMR (400 MHz,  $\text{CDCl}_3$ )  $\delta$  7.65 (d,  $J = 15.6$  Hz, 1H), 7.53 (d,  $J = 8.5$  Hz, 2H), 7.47 (d,  $J = 8.5$  Hz, 2H), 7.39 (d,  $J = 15.6$  Hz, 1H), 7.13 (dd,  $J = 4.1, 1.5$  Hz, 1H), 7.01 – 6.95 (m, 1H), 6.21 (dd,  $J = 4.1, 2.5$  Hz, 1H), 4.46 (q,  $J = 7.1$  Hz, 2H), 1.42 (t,  $J = 7.1$  Hz, 3H);  $^{13}\text{C}$  NMR (100 MHz,  $\text{CDCl}_3$ )  $\delta$  178.88, 139.92, 134.26, 132.07, 131.72, 131.47, 131.08, 130.46, 129.93, 129.55, 124.38, 123.99, 119.97, 108.59, 44.99, 16.96. IR (KBr)  $\nu_{\text{max}}$  3429, 3119, 2924, 1647, 1595, 1523, 1050, 951, and 738  $\text{cm}^{-1}$ ; HRMS (ESI) calcd. for  $\text{C}_{15}\text{H}_{15}\text{BrNO}$ :  $[\text{M}+\text{H}]^+$ : 304.0337, found: 304.0336.

**(E)-3-(4-chlorophenyl)-1-(1-ethyl-1H-pyrrol-2-yl)prop-2-en-1-one (4f)**

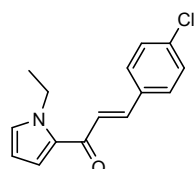

Isolated as a yellow solid, m. p. 53 – 54 °C, 49 mg, 95% yield;  $^1\text{H}$  NMR (400 MHz,  $\text{CDCl}_3$ )  $\delta$  7.67 (d,  $J = 15.6$  Hz, 1H), 7.54 (d,  $J = 8.4$  Hz, 2H), 7.38 (dd,  $J = 12.0, 4.8$  Hz, 3H), 7.13 (dd,  $J = 4.0, 1.5$  Hz, 1H), 7.00 – 6.94 (m, 1H), 6.22 (dd,  $J = 4.0, 2.5$  Hz, 1H), 4.47 (q,  $J = 7.1$  Hz, 2H), 1.42 (t,  $J = 7.1$  Hz, 3H);  $^{13}\text{C}$  NMR (100 MHz,  $\text{CDCl}_3$ )  $\delta$  178.89, 139.85, 135.66, 133.82, 131.08, 130.44, 129.31, 129.11, 124.28, 119.95, 108.58, 44.99, 16.97. IR (KBr)  $\nu_{\text{max}}$  3414, 3125, 1647, 1617, 1593, 1523, 1075, 1055, and 779  $\text{cm}^{-1}$ ; HRMS (ESI) calcd. for  $\text{C}_{15}\text{H}_{15}\text{ClNO}$ :  $[\text{M}+\text{H}]^+$ : 260.0842, found: 260.0840.

**(E)-1-(1-ethyl-1H-pyrrol-2-yl)-3-(4-fluorophenyl)prop-2-en-1-one (4g)**

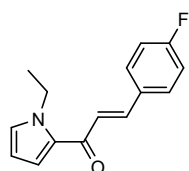

Isolated as a yellow liquid, 48 mg, 98% yield;  $^1\text{H}$  NMR (400 MHz,  $\text{CDCl}_3$ )  $\delta$  7.69 (d,  $J = 15.6$  Hz, 1H), 7.59 (dd,  $J = 8.0, 5.7$  Hz, 2H), 7.34 (d,  $J = 15.6$  Hz, 1H), 7.12 (d,  $J$

= 2.9 Hz, 1H), 7.08 (t,  $J = 8.5$  Hz, 2H), 6.96 (s, 1H), 6.22 (d,  $J = 2.6$  Hz, 1H), 4.46 (q,  $J = 7.1$  Hz, 2H), 1.42 (t,  $J = 7.1$  Hz, 3H);  $^{13}\text{C}$  NMR (100 MHz,  $\text{CDCl}_3$ )  $\delta$  179.06, 163.57(d,  $J = 249.1$  Hz), 140.04, 131.55(d,  $J = 3.2$  Hz), 131.10, 130.32, 130.01(d,  $J = 8.5$  Hz), 123.54(d,  $J = 2.2$  Hz), 119.81, 115.95(d,  $J = 21.8$  Hz), 108.52, 44.97, 16.97. IR (KBr)  $\nu_{\text{max}}$  3435, 2930, 1649, 1589, 1587, 1524, 1508, 996, and 731  $\text{cm}^{-1}$ ; HRMS (ESI) calcd. for  $\text{C}_{15}\text{H}_{15}\text{FNO}$ :  $[\text{M}+\text{H}]^+$ : 244.1138, found: 244.1137.

**(E)-3-phenyl-1-(1-propyl-1H-pyrrol-2-yl)prop-2-en-1-one (4h)**

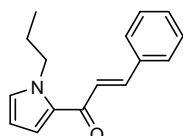

Isolated as a yellow liquid, 35 mg, 74% yield;  $^1\text{H}$  NMR (400 MHz,  $\text{CDCl}_3$ )  $\delta$  7.73 (d,  $J = 15.6$  Hz, 1H), 7.61 (d,  $J = 6.4$  Hz, 2H), 7.48 – 7.34 (m, 4H), 7.14 (d,  $J = 2.7$  Hz, 1H), 6.94 (s, 1H), 6.20 (s, 1H), 4.38 (t,  $J = 7.1$  Hz, 2H), 1.82 (dd,  $J = 14.5, 7.2$  Hz, 2H), 0.93 (t,  $J = 7.4$  Hz, 3H);  $^{13}\text{C}$  NMR (100 MHz,  $\text{CDCl}_3$ )  $\delta$  179.35, 141.32, 135.33, 131.27, 131.13, 129.87, 128.85, 128.16, 123.85, 119.85, 108.22, 51.67, 24.81, 11.10. IR (KBr)  $\nu_{\text{max}}$  3419, 2963, 2927, 1648, 1595, 1524, 1053, 984, and 737  $\text{cm}^{-1}$ ; HRMS (ESI) calcd. for  $\text{C}_{16}\text{H}_{18}\text{NO}$ :  $[\text{M}+\text{H}]^+$ : 240.1388, found: 240.1387.

**(E)-1-(1-butyl-1H-pyrrol-2-yl)-3-phenylprop-2-en-1-one (4i)**

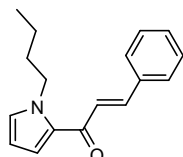

Isolated as a yellow liquid, 40 mg, 80% yield;  $^1\text{H}$  NMR (400 MHz,  $\text{CDCl}_3$ )  $\delta$  7.73 (d,  $J = 15.6$  Hz, 1H), 7.65 – 7.57 (m, 2H), 7.46 – 7.35 (m, 4H), 7.14 (dd,  $J = 4.0, 1.4$  Hz, 1H), 6.93 (s, 1H), 6.20 (dd,  $J = 3.9, 2.5$  Hz, 1H), 4.41 (t,  $J = 7.3$  Hz, 2H), 1.85 – 1.73 (m, 2H), 1.35 (dd,  $J = 15.2, 7.5$  Hz, 2H), 0.94 (t,  $J = 7.4$  Hz, 3H);  $^{13}\text{C}$  NMR (100 MHz,  $\text{CDCl}_3$ )  $\delta$  179.33, 141.32, 135.34, 131.27, 131.04, 129.87, 128.85, 128.46, 128.41, 128.16, 123.85, 119.83, 108.26, 49.87, 33.69, 19.88, 13.77. IR (KBr)  $\nu_{\text{max}}$  3434, 2957, 2871, 1648, 1595, 1524, 1495, 977, and 737  $\text{cm}^{-1}$ ; HRMS (ESI) calcd. for  $\text{C}_{17}\text{H}_{20}\text{NO}$ :  $[\text{M}+\text{H}]^+$ : 254.1545, found: 254.1546.

**(E)-1-(1-butyl-1H-pyrrol-2-yl)-3-(p-tolyl)prop-2-en-1-one (4j)**

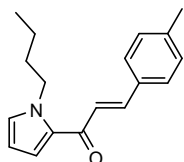

Isolated as a light yellow liquid, 43 mg, 81% yield;  $^1\text{H}$  NMR (400 MHz,  $\text{CDCl}_3$ )  $\delta$  7.71 (d,  $J = 15.6$  Hz, 1H), 7.51 (d,  $J = 8.1$  Hz, 2H), 7.38 (d,  $J = 15.6$  Hz, 1H), 7.20 (d,  $J = 7.9$  Hz, 2H), 7.13 (dd,  $J = 4.1, 1.6$  Hz, 1H), 6.94 – 6.90 (m, 1H), 6.19 (dd,  $J = 4.1, 2.5$  Hz, 1H), 4.41 (t,  $J = 7.3$  Hz, 2H), 2.38 (s, 3H), 1.78 (dd,  $J = 14.9, 7.4$  Hz, 2H), 1.35 (dq,  $J = 14.8, 7.4$  Hz, 2H), 0.94 (t,  $J = 7.3$  Hz, 3H);  $^{13}\text{C}$  NMR (100 MHz,  $\text{CDCl}_3$ )  $\delta$  179.53, 141.36, 140.25, 132.58, 131.33, 130.88, 129.59, 128.17, 122.86, 119.65, 108.18, 49.85, 33.70, 21.49, 19.88, 13.77. IR (KBr)  $\nu_{\text{max}}$  3445, 3106, 2956, 2871, 1647, 1592, 1523, 1083, 1052, 979, and 728  $\text{cm}^{-1}$ ; HRMS (ESI) calcd. for  $\text{C}_{18}\text{H}_{22}\text{NO}$ :  $[\text{M}+\text{H}]^+$ : 268.1701, found: 268.1701.

**(E)-1-(1-pentyl-1H-pyrrol-2-yl)-3-phenylprop-2-en-1-one (4k)**

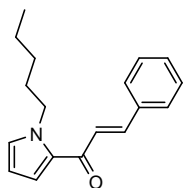

Isolated as a light yellow liquid, 44 mg, 82% yield;  $^1\text{H}$  NMR (400 MHz,  $\text{CDCl}_3$ )  $\delta$  7.73 (d,  $J = 15.6$  Hz, 1H), 7.61 (dd,  $J = 7.6, 1.7$  Hz, 2H), 7.46 – 7.33 (m, 4H), 7.14 (dd,  $J = 4.1, 1.6$  Hz, 1H), 6.96 – 6.91 (m, 1H), 6.20 (dd,  $J = 4.1, 2.5$  Hz, 1H), 4.47 – 4.35 (m, 2H), 1.88 – 1.77 (m, 2H), 1.42 – 1.27 (m, 4H), 0.89 (t,  $J = 7.0$  Hz, 3H);  $^{13}\text{C}$  NMR (100 MHz,  $\text{CDCl}_3$ )  $\delta$  179.33, 141.30, 135.34, 131.25, 131.02, 129.87, 128.85, 128.16, 123.86, 119.81, 108.26, 50.10, 31.35, 28.86, 22.39, 14.04. IR (KBr)  $\nu_{\text{max}}$  3429, 3107, 2954, 2928, 2858, 1648, 1594, 1523, 1495, and 736  $\text{cm}^{-1}$ ; HRMS (ESI) calcd. for  $\text{C}_{18}\text{H}_{22}\text{NO}$ :  $[\text{M}+\text{H}]^+$ : 268.1701, found: 268.1700.

**(E)-1-(1-pentyl-1H-pyrrol-2-yl)-3-(p-tolyl)prop-2-en-1-one (4l)**

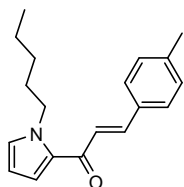

Isolated as a light yellow liquid, 45 mg, 80% yield;  $^1\text{H}$  NMR (400 MHz,  $\text{CDCl}_3$ )  $\delta$



7.71 (d,  $J = 15.6$  Hz, 1H), 7.51 (d,  $J = 7.8$  Hz, 2H), 7.38 (d,  $J = 15.6$  Hz, 1H), 7.20 (d,  $J = 7.7$  Hz, 2H), 7.13 (d,  $J = 2.9$  Hz, 1H), 6.92 (s, 1H), 6.19 (s, 1H), 4.40 (t,  $J = 7.2$  Hz, 2H), 2.38 (s, 3H), 1.88 – 1.75 (m, 2H), 1.32 (s, 4H), 0.89 (t,  $J = 6.7$  Hz, 3H);  $^{13}\text{C}$  NMR (100 MHz,  $\text{CDCl}_3$ )  $\delta$  179.53, 141.35, 140.24, 132.58, 131.31, 130.86, 129.59, 128.16, 122.86, 119.63, 108.17, 50.08, 31.36, 28.86, 22.39, 21.48, 14.04. IR (KBr)  $\nu_{\text{max}}$  3434, 2954, 2925, 2857, 1647, 1592, 1053, 805, and 727  $\text{cm}^{-1}$ ; HRMS (ESI) calcd. for  $\text{C}_{19}\text{H}_{24}\text{NO}$ :  $[\text{M}+\text{H}]^+$ : 282.1858, found: 282.1857.

**(E)-1-(1-isopentyl-1H-pyrrol-2-yl)-3-phenylprop-2-en-1-one (4m)**

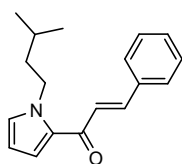

Isolated as a light yellow liquid, 38 mg, 72% yield;  $^1\text{H}$  NMR (400 MHz,  $\text{CDCl}_3$ )  $\delta$  7.74 (d,  $J = 15.6$  Hz, 1H), 7.61 (d,  $J = 6.4$  Hz, 2H), 7.50 – 7.33 (m, 4H), 7.13 (d,  $J = 2.8$  Hz, 1H), 6.94 (s, 1H), 6.27 – 6.16 (m, 1H), 4.50 – 4.37 (m, 2H), 1.69 (dd,  $J = 14.2$ , 6.6 Hz, 2H), 1.67 – 1.60 (m, 1H), 0.97 (d,  $J = 6.2$  Hz, 7H);  $^{13}\text{C}$  NMR (100 MHz,  $\text{CDCl}_3$ )  $\delta$  179.32, 141.30, 135.34, 131.25, 130.83, 129.87, 128.85, 128.15, 123.86, 119.81, 108.35, 48.48, 40.55, 25.85, 22.52. IR (KBr)  $\nu_{\text{max}}$  3428, 2955, 2925, 1648, 1595, 1524, 1083, 1053, 974, and 734  $\text{cm}^{-1}$ ; HRMS (ESI) calcd. for  $\text{C}_{18}\text{H}_{23}\text{NO}$ :  $[\text{M}+\text{H}]^+$ : 268.1701, found: 268.1700.

**(E)-1-(1-benzyl-1H-pyrrol-2-yl)-3-(p-tolyl)prop-2-en-1-one (4n)**

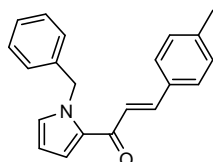

Isolated as a white solid, m. p. 132 – 133  $^{\circ}\text{C}$ , 35 mg, 58% yield;  $^1\text{H}$  NMR (400 MHz,  $\text{CDCl}_3$ )  $\delta$  7.68 (d,  $J = 15.6$  Hz, 1H), 7.49 (d,  $J = 8.0$  Hz, 2H), 7.36 (d,  $J = 15.6$  Hz, 1H), 7.30 (t,  $J = 7.3$  Hz, 2H), 7.24 (d,  $J = 7.2$  Hz, 1H), 7.22 – 7.11 (m, 5H), 6.96 (s, 1H), 6.26 (dd,  $J = 3.9$ , 2.6 Hz, 1H), 5.70 (s, 2H), 2.37 (s, 3H);  $^{13}\text{C}$  NMR (100 MHz,  $\text{CDCl}_3$ )  $\delta$  179.74, 141.70, 140.34, 138.39, 132.49, 131.62, 131.06, 129.60, 128.63, 128.20, 127.40, 127.06, 122.63, 119.75, 108.87, 52.72, 21.49. IR (KBr)  $\nu_{\text{max}}$  3435, 3025, 2918, 1650, 1591, 1089, 1059, 992, 813, and 718  $\text{cm}^{-1}$ ; HRMS (ESI) calcd. for  $\text{C}_{21}\text{H}_{20}\text{NO}$ :  $[\text{M}+\text{H}]^+$ : 302.1545, found: 302.1544.

**(E)-3-phenyl-1-(1-phenyl-1H-pyrrol-2-yl)prop-2-en-1-one (4o)**

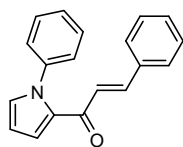

Isolated as a yellow liquid, 22 mg, 40% yield;  $^1\text{H}$  NMR (400 MHz,  $\text{CDCl}_3$ )  $\delta$  7.67 (d,  $J = 15.7$  Hz, 1H), 7.56 (dd,  $J = 7.0, 2.1$  Hz, 2H), 7.48 – 7.42 (m, 2H), 7.42 – 7.34 (m, 5H), 7.34 – 7.29 (m, 2H), 7.28 – 7.22 (m, 1H), 7.07 – 7.01 (m, 1H), 6.37 (dd,  $J = 3.8, 2.7$  Hz, 1H);  $^{13}\text{C}$  NMR (100 MHz,  $\text{CDCl}_3$ )  $\delta$  178.84, 142.15, 140.99, 135.17, 132.73, 131.64, 130.04, 128.86, 128.73, 128.23, 127.71, 126.08, 123.44, 120.00, 109.58. IR (KBr)  $\nu_{\text{max}}$  3420, 2920, 2850, 1651, 1600, 1574, 1524, 762, and 740  $\text{cm}^{-1}$ ; HRMS (ESI) calcd. for  $\text{C}_{19}\text{H}_{16}\text{NO}$ :  $[\text{M}+\text{H}]^+$ : 274.1232, found: 274.1231.

**(E)-3-phenyl-1-(1-(thiophen-2-yl)-1H-pyrrol-2-yl)prop-2-en-1-one (4p)**

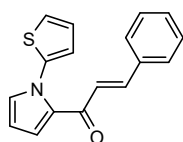

Isolated as a yellow liquid, 22 mg, 39% yield;  $^1\text{H}$  NMR (400 MHz,  $\text{CDCl}_3$ )  $\delta$  7.70 (d,  $J = 15.6$  Hz, 1H), 7.56 (dd,  $J = 6.5, 2.9$  Hz, 2H), 7.38 (dd,  $J = 5.0, 1.8$  Hz, 3H), 7.34 (d,  $J = 15.6$  Hz, 1H), 7.28 – 7.24 (m, 1H), 7.22 (dd,  $J = 4.0, 1.5$  Hz, 1H), 7.07 (dd,  $J = 2.4, 1.7$  Hz, 1H), 7.04 – 6.93 (m, 2H), 6.37 (dd,  $J = 3.9, 2.7$  Hz, 1H);  $^{13}\text{C}$  NMR (100 MHz,  $\text{CDCl}_3$ )  $\delta$  178.66, 142.43, 142.30, 135.09, 133.98, 132.99, 130.12, 128.87, 128.27, 125.21, 123.88, 123.76, 123.07, 119.95, 109.88. IR (KBr)  $\nu_{\text{max}}$  3426, 3124, 2875, 2712, 2563, 1698, 1587, 1502, and 845  $\text{cm}^{-1}$ ; HRMS (ESI) calcd. for  $\text{C}_{17}\text{H}_{14}\text{NOS}$ :  $[\text{M}+\text{H}]^+$ : 280.0796, found: 280.0795.

**(E)-1-(1-ethyl-1H-pyrrol-2-yl)-3-(m-tolyl)prop-2-en-1-one (4q)**

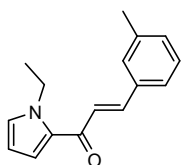

Isolated as a light yellow liquid, 41 mg, 85% yield;  $^1\text{H}$  NMR (400 MHz,  $\text{CDCl}_3$ )  $\delta$  7.68 (s, 1H), 7.47 – 7.35 (m, 3H), 7.29 (t,  $J = 7.9$  Hz, 1H), 7.19 (d,  $J = 7.5$  Hz, 1H), 7.14 (dd,  $J = 4.1, 1.6$  Hz, 1H), 7.00 – 6.89 (m, 1H), 6.21 (dd,  $J = 4.0, 2.5$  Hz, 1H),

4.47 (q,  $J = 7.1$  Hz, 2H), 2.39 (s, 3H), 1.42 (t,  $J = 7.1$  Hz, 3H);  $^{13}\text{C}$  NMR (100 MHz,  $\text{CDCl}_3$ )  $\delta$  179.39, 141.53, 138.48, 135.28, 131.23, 130.76, 130.18, 128.75, 125.44, 123.64, 119.78, 108.45, 44.95, 21.38, 17.00. IR (KBr)  $\nu_{\text{max}}$  3436, 2903, 132, 1567, 1543, 1513, 1065, 1021, and 735  $\text{cm}^{-1}$ ; HRMS (ESI) calcd. for  $\text{C}_{16}\text{H}_{18}\text{NO}$ :  $[\text{M}+\text{H}]^+$ : 240.1388, found: 240.1387.

**(E)-1-(1-ethyl-1H-pyrrol-2-yl)-3-(o-tolyl)prop-2-en-1-one (4r)**

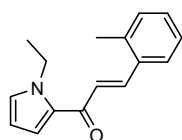

Isolated as a light yellow liquid, 38 mg, 80% yield;  $^1\text{H}$  NMR (400 MHz,  $\text{CDCl}_3$ )  $\delta$  8.03 (d,  $J = 15.5$  Hz, 1H), 7.66 (d,  $J = 6.9$  Hz, 1H), 7.34 (d,  $J = 15.5$  Hz, 1H), 7.24 (tt,  $J = 9.7, 6.6$  Hz, 3H), 7.13 (dd,  $J = 4.0, 1.5$  Hz, 1H), 6.99 – 6.90 (m, 1H), 6.25 – 6.16 (m, 1H), 4.47 (q,  $J = 7.1$  Hz, 2H), 2.47 (s, 3H), 1.43 (t,  $J = 7.1$  Hz, 3H);  $^{13}\text{C}$  NMR (100 MHz,  $\text{CDCl}_3$ )  $\delta$  179.37, 138.99, 137.98, 134.35, 131.22, 130.82, 130.28, 129.66, 126.26, 124.95, 119.86, 108.52, 44.98, 19.91, 17.04. IR (KBr)  $\nu_{\text{max}}$  3436, 2843, 1675, 1564, 1513, 1501, 1032, 1011 and 754  $\text{cm}^{-1}$ ; HRMS (ESI) calcd. for  $\text{C}_{16}\text{H}_{18}\text{NO}$ :  $[\text{M}+\text{H}]^+$ : 240.1388, found: 240.1387.

**(E)-1-(1-ethyl-1H-pyrrol-2-yl)-3-(furan-2-yl)prop-2-en-1-one (4s)**

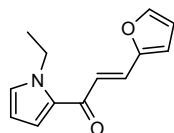

Isolated as a yellow liquid, 33 mg, 76% yield;  $^1\text{H}$  NMR (400 MHz,  $\text{CDCl}_3$ )  $\delta$  7.49 (dd,  $J = 8.1, 7.2$  Hz, 2H), 7.33 (d,  $J = 15.4$  Hz, 1H), 7.13 (dd,  $J = 4.0, 1.5$  Hz, 1H), 6.98 – 6.90 (m, 1H), 6.63 (d,  $J = 3.3$  Hz, 1H), 6.48 (dd,  $J = 3.3, 1.8$  Hz, 1H), 6.20 (dd,  $J = 4.0, 2.5$  Hz, 1H), 4.46 (q,  $J = 7.1$  Hz, 2H), 1.41 (t,  $J = 7.1$  Hz, 3H);  $^{13}\text{C}$  NMR (100 MHz,  $\text{CDCl}_3$ )  $\delta$  179.00, 152.00, 144.22, 131.24, 130.14, 127.66, 121.64, 119.81, 114.65, 112.38, 108.48, 44.91, 16.97. IR (KBr)  $\nu_{\text{max}}$  3429, 3117, 2930, 1650, 1595, 1554, 1523, 1051, and 743  $\text{cm}^{-1}$ ; HRMS (ESI) calcd. for  $\text{C}_{13}\text{H}_{14}\text{NO}_2$ :  $[\text{M}+\text{H}]^+$ : 216.1025, found: 216.1024.

**(E)-1-(1-ethyl-1H-pyrrol-2-yl)-3-(thiophen-2-yl)prop-2-en-1-one (4t)**

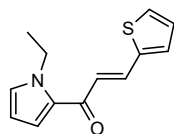

Isolated as a light yellow solid, m. p. 54 – 55 °C, 38 mg, 82% yield;  $^1\text{H}$  NMR (400 MHz,  $\text{CDCl}_3$ )  $\delta$  7.84 (d,  $J = 15.3$  Hz, 1H), 7.35 (d,  $J = 4.7$  Hz, 1H), 7.29 (d,  $J = 2.7$  Hz, 1H), 7.22 (d,  $J = 15.3$  Hz, 1H), 7.11 (d,  $J = 2.7$  Hz, 1H), 7.09 – 6.99 (m, 1H), 6.95 (s, 1H), 6.20 (s, 1H), 4.46 (q,  $J = 7.0$  Hz, 2H), 1.41 (t,  $J = 7.1$  Hz, 3H);  $^{13}\text{C}$  NMR (100 MHz,  $\text{CDCl}_3$ )  $\delta$  178.85, 140.77, 133.83, 131.09, 130.89, 130.20, 128.14, 127.72, 122.90, 119.72, 108.49, 44.93, 16.98. IR (KBr)  $\nu_{\text{max}}$  3429, 3104, 2981, 2930, 1641, 1585, 1524, 1051, and 740  $\text{cm}^{-1}$ ; HRMS (ESI) calcd. for  $\text{C}_{13}\text{H}_{14}\text{NOS}$ :  $[\text{M}+\text{H}]^+$ : 232.0796, found: 232.0795.

**(E)-1-(1-butyl-1H-pyrrol-3-yl)-3-phenylprop-2-en-1-one (4u)**

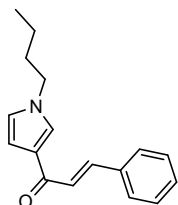

Isolated as a yellow liquid, 23 mg, 46% yield;  $^1\text{H}$  NMR (400 MHz,  $\text{CDCl}_3$ )  $\delta$  7.76 (d,  $J = 15.7$  Hz, 1H), 7.62 (d,  $J = 6.4$  Hz, 2H), 7.40 (dd,  $J = 15.9, 8.9$  Hz, 4H), 7.28 (d,  $J = 16.3$  Hz, 1H), 6.73 (s, 1H), 6.67 (s, 1H), 3.92 (t,  $J = 7.1$  Hz, 2H), 1.80 (dt,  $J = 14.8, 7.2$  Hz, 2H), 1.34 (dq,  $J = 14.7, 7.4$  Hz, 2H), 0.95 (t,  $J = 7.3$  Hz, 3H);  $^{13}\text{C}$  NMR (100 MHz,  $\text{CDCl}_3$ )  $\delta$  184.55, 141.56, 135.41, 129.85, 128.82, 128.18, 126.40, 126.06, 123.75, 122.44, 109.50, 50.01, 33.18, 19.80, 13.58. IR (KBr)  $\nu_{\text{max}}$  3420, 2958, 2928, 2872, 1651, 1593, 1527, 765 and 738  $\text{cm}^{-1}$ ; HRMS (ESI) calcd. for  $\text{C}_{17}\text{H}_{20}\text{NO}$ :  $[\text{M}+\text{H}]^+$ : 254.1545, found: 254.1544.

**(E)-3-phenyl-1-(1-propyl-1H-indol-3-yl)prop-2-en-1-one (4v)**

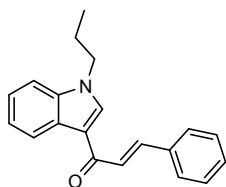

Isolated as a light yellow solid, m. p. 101 – 102 °C, 32 mg, 55% yield;  $^1\text{H}$  NMR (400 MHz,  $\text{CDCl}_3$ )  $\delta$  8.59 – 8.49 (m, 1H), 7.89 (s, 1H), 7.82 (d,  $J = 15.6$  Hz, 1H), 7.65 (d,  $J$

= 6.6 Hz, 2H), 7.45 – 7.35 (m, 5H), 7.35 – 7.27 (m, 2H), 4.15 (t,  $J = 7.1$  Hz, 2H), 2.02– 1.90 (m, 2H), 0.98 (t,  $J = 7.4$  Hz, 3H);  $^{13}\text{C}$  NMR (100 MHz,  $\text{CDCl}_3$ )  $\delta$  184.34, 140.95, 136.95, 135.42, 134.49, 129.75, 128.80, 128.10, 126.96, 123.96, 123.48, 123.09, 122.59, 117.57, 109.87, 48.82, 23.19, 11.41, 0.99. IR (KBr)  $\nu_{\text{max}}$  3012,2993,2890,2811,1645,1623,1566,1501,801, and 784  $\text{cm}^{-1}$ ; HRMS (ESI) calcd. for  $\text{C}_{20}\text{H}_{20}\text{NO}$ :  $[\text{M}+\text{H}]^+$ : 290.1545, found: 290.1544.

## 5. References

1. Thirunarayanan, G.; Vanangamudi, G.; Subramanian, M. Solvent free synthesis, spectral linearity, antimicrobial, antioxidant and insect antifeedant activities of some 1-methyl-2-pyrrolyl chalcones. *Org. Chem. An Indian J.*, **2013**, *9*, 1-16.
2. Zsolt, R.; Tamás, S.; György, K.; Áron, S.; László, D.; Péter, B. Enantioselective synthesis of heteroaromatic epoxyketones under phase-transfer catalysis using d-glucose- and d-mannose-based crown ethers. *Tetrahedron: Asymmetry*, **2011**, *22*, 1189–1196.
3. Udo, B.; B, J. E.; Ingemar, N.; Marie, B. Parallel solution phase synthesis of N-substituted 2-pyrazoline libraries. *Tetrahedron Lett.*, **2000**, *41*, 2713–2717.

## 6. Copy of <sup>1</sup>H and <sup>13</sup>C NMR Spectra

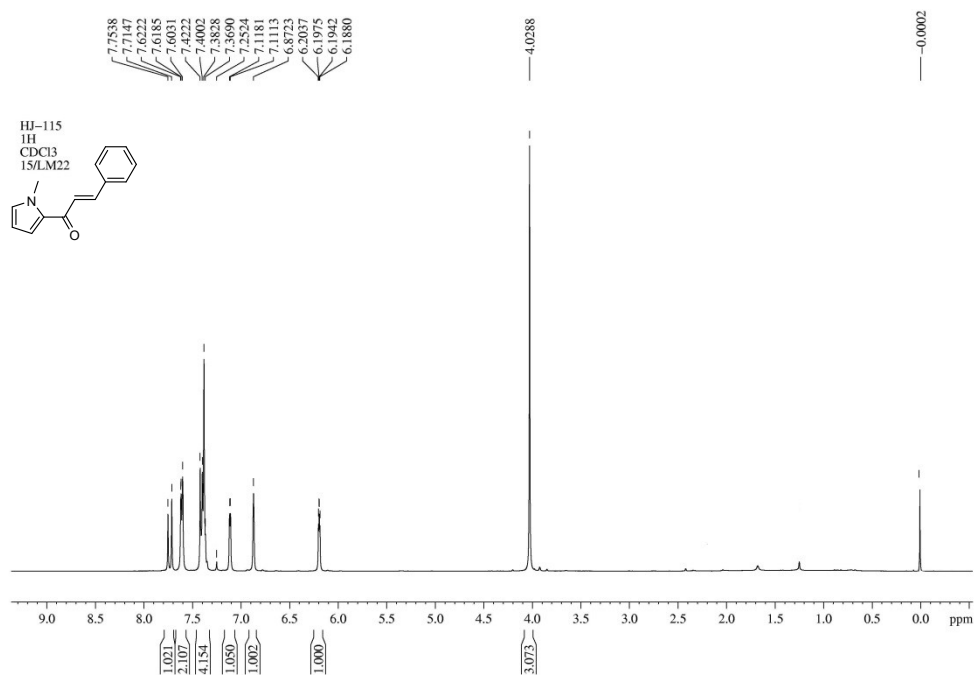

<sup>1</sup>H NMR spectrum of compound 3a

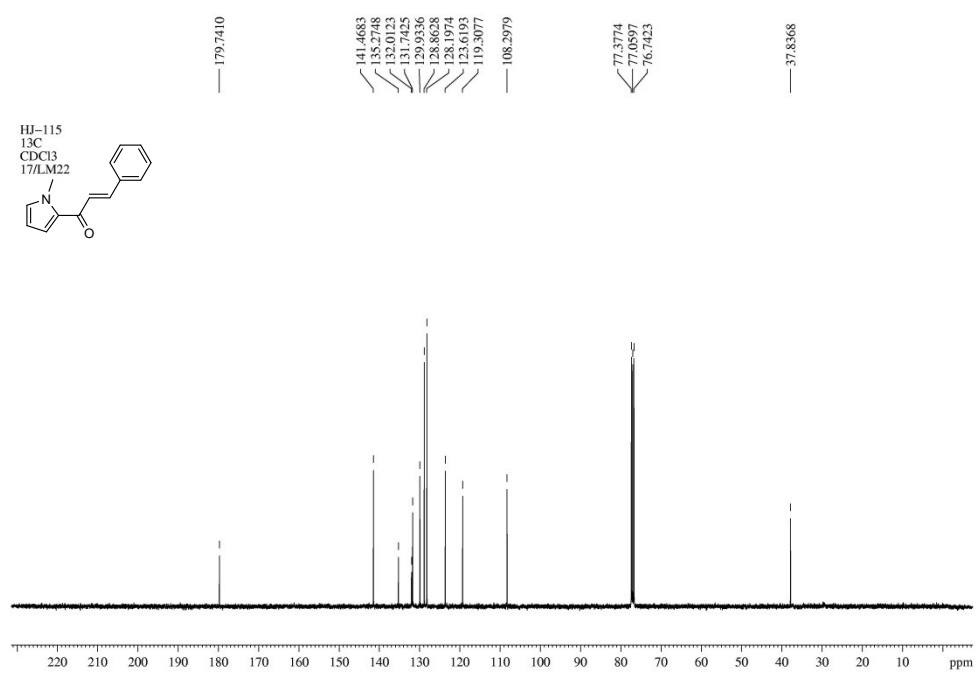

### <sup>13</sup>C NMR spectrum of compound **3a**

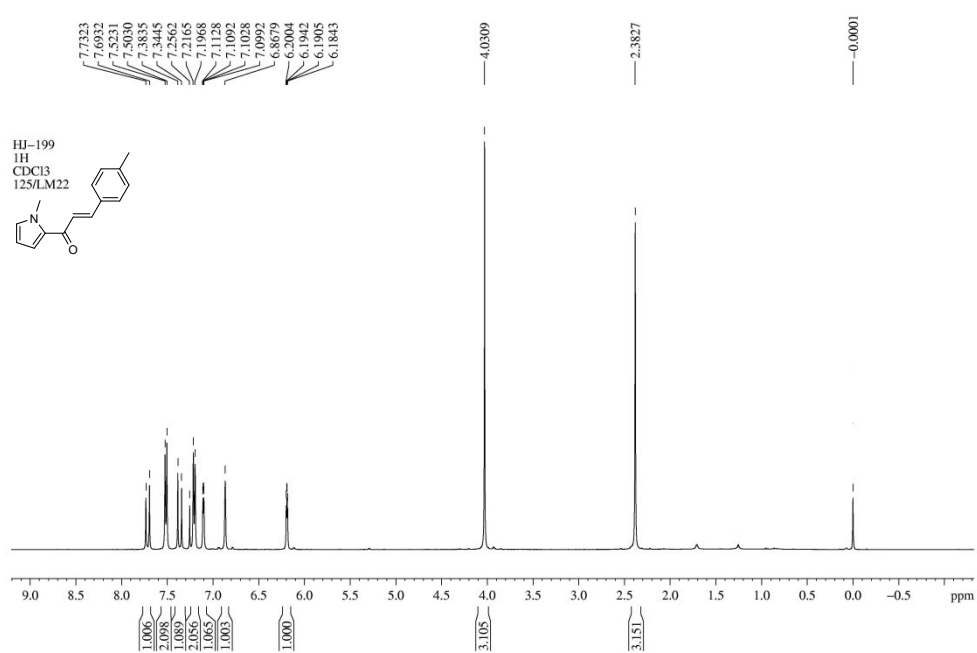

### <sup>1</sup>H NMR spectrum of compound **3b**

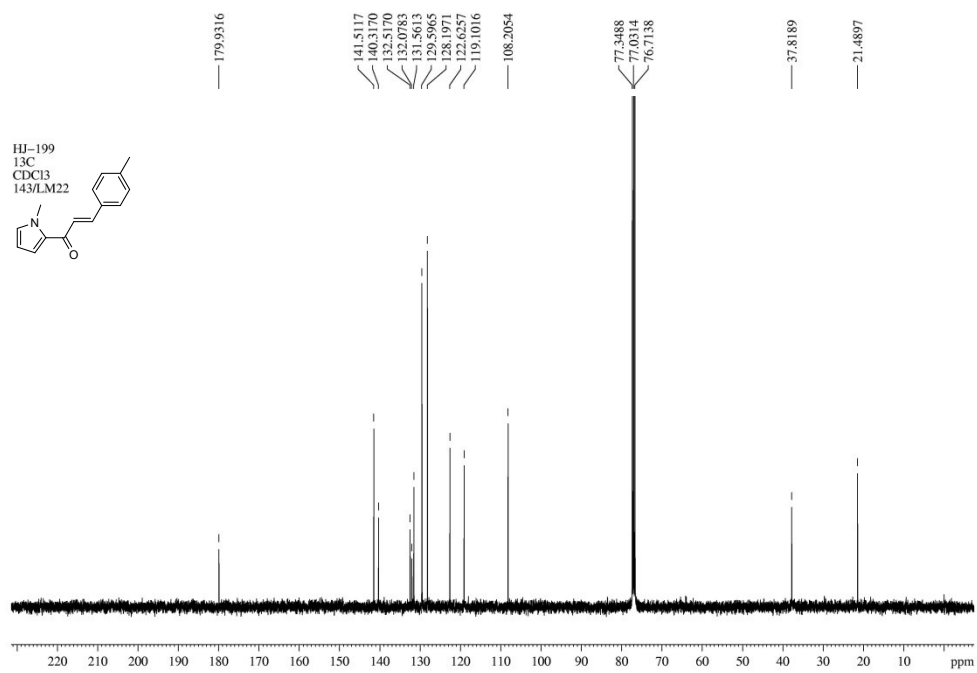

<sup>13</sup>C NMR spectrum of compound **3b**

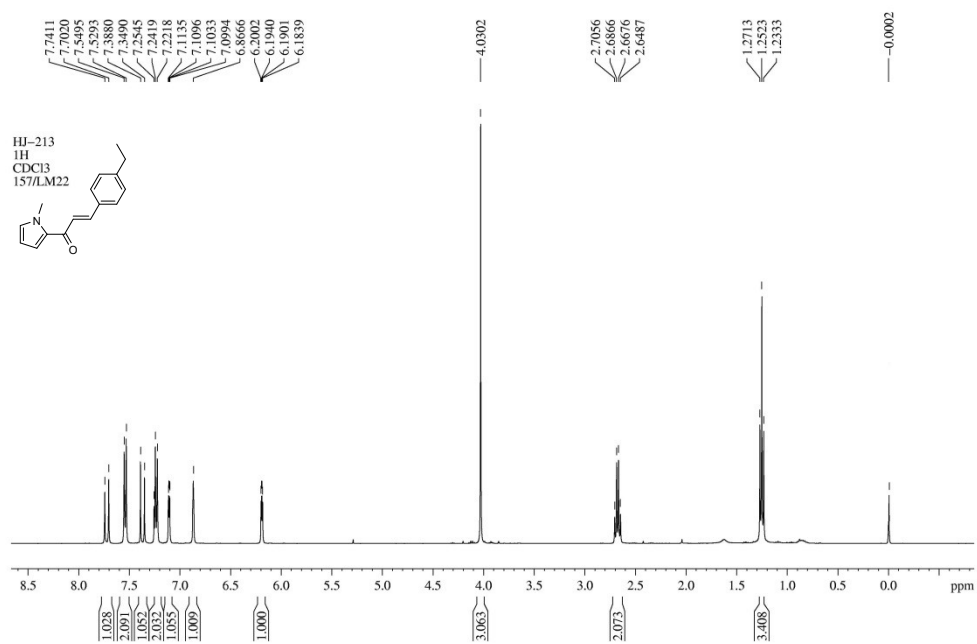

<sup>1</sup>H NMR spectrum of compound **3c**



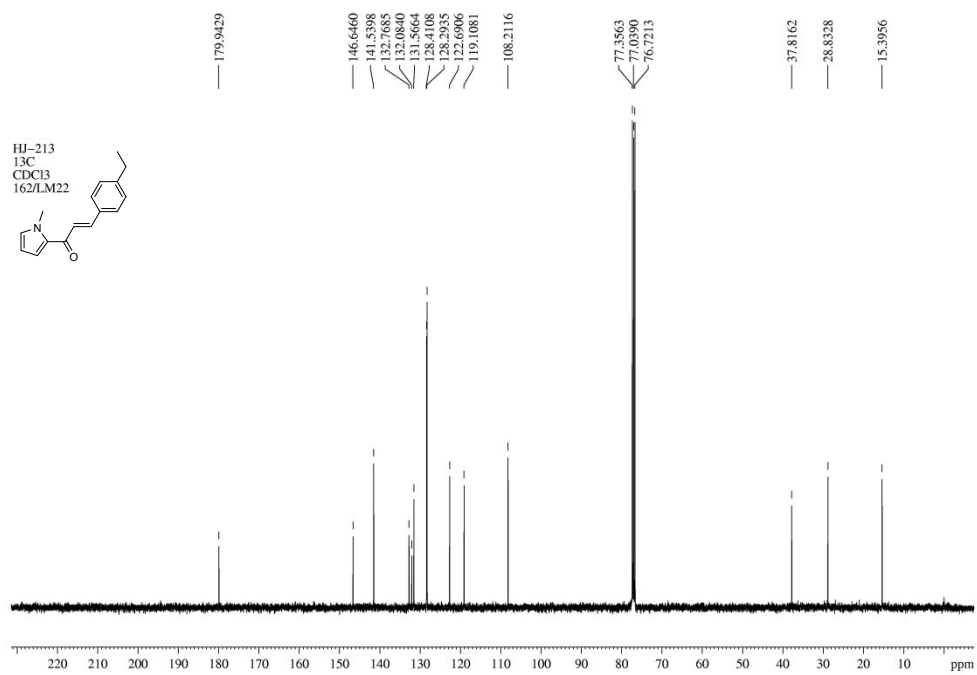

$^{13}\text{C}$  NMR spectrum of compound **3c**

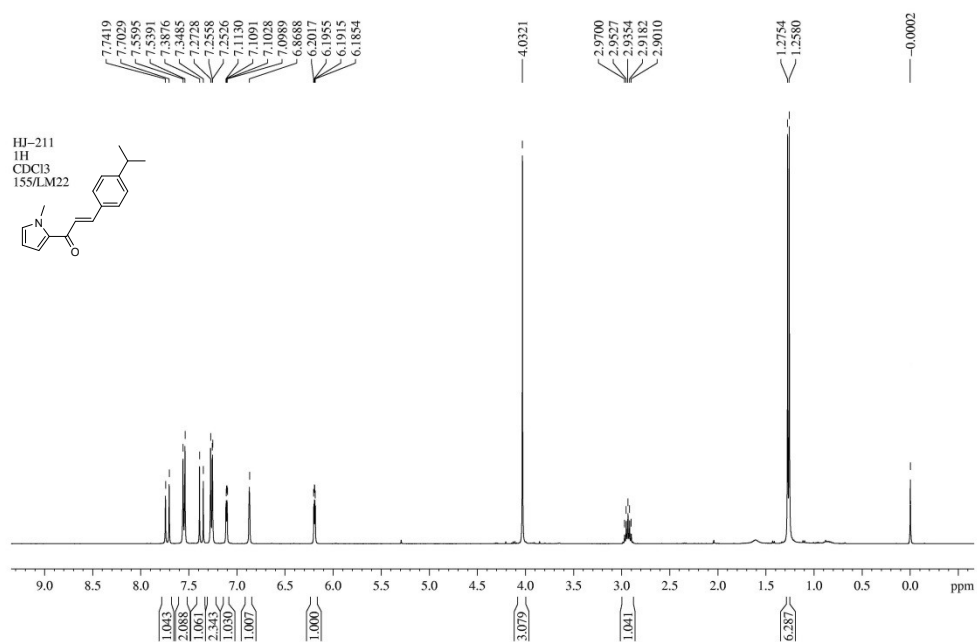

<sup>1</sup>H NMR spectrum of compound **3d**

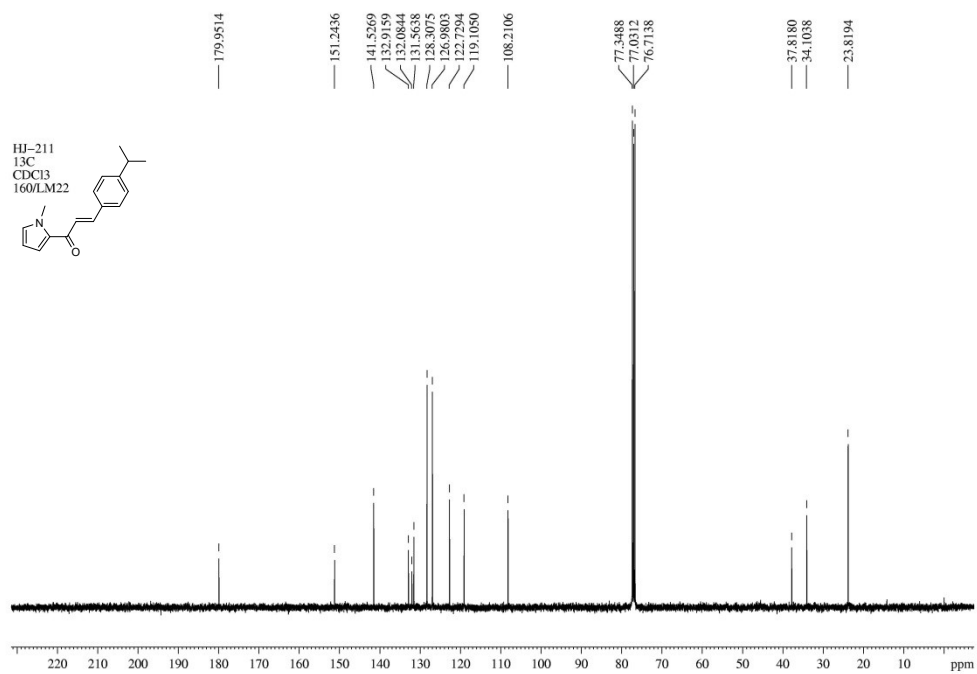

<sup>13</sup>C NMR spectrum of compound **3d**

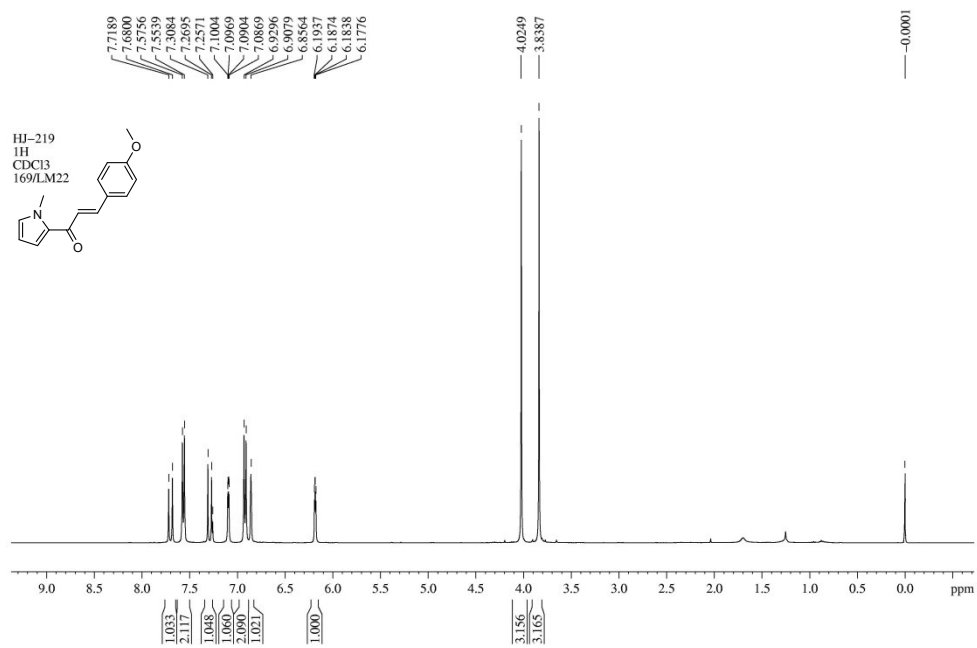

<sup>1</sup>H NMR spectrum of compound **3e**

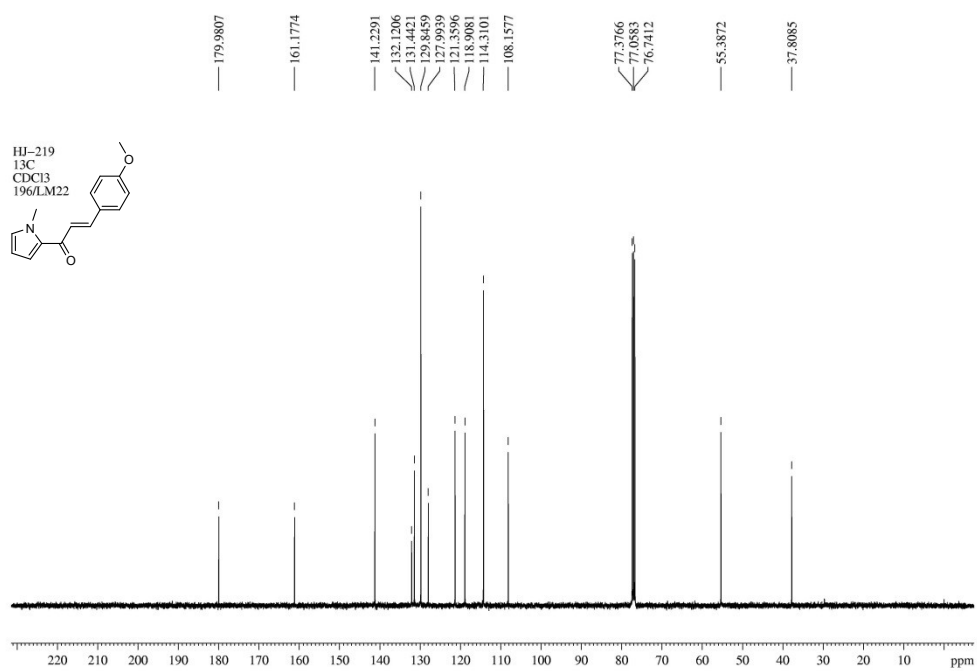

<sup>13</sup>C NMR spectrum of compound **3e**

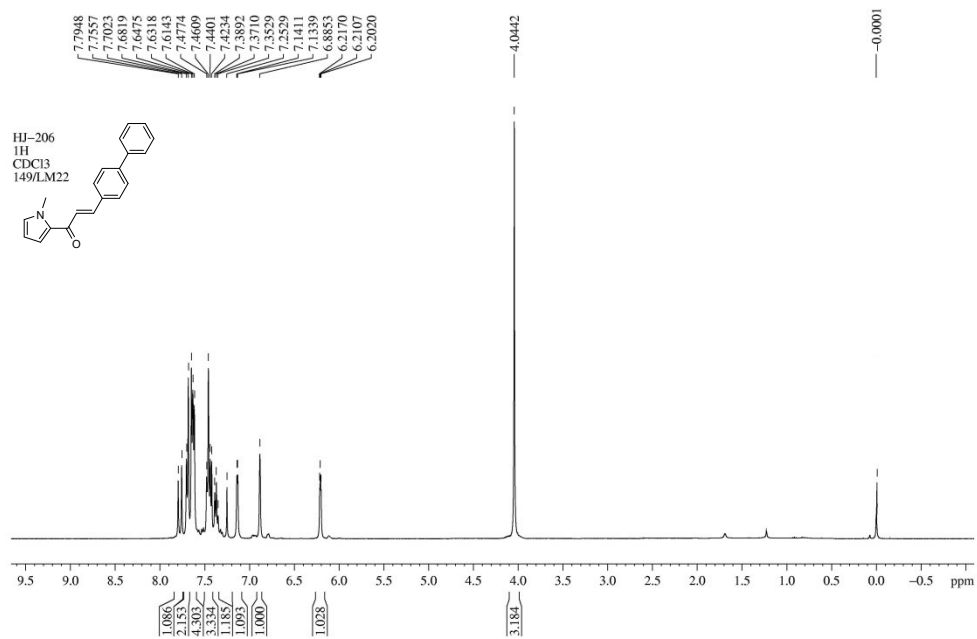

<sup>1</sup>H NMR spectrum of compound **3f**

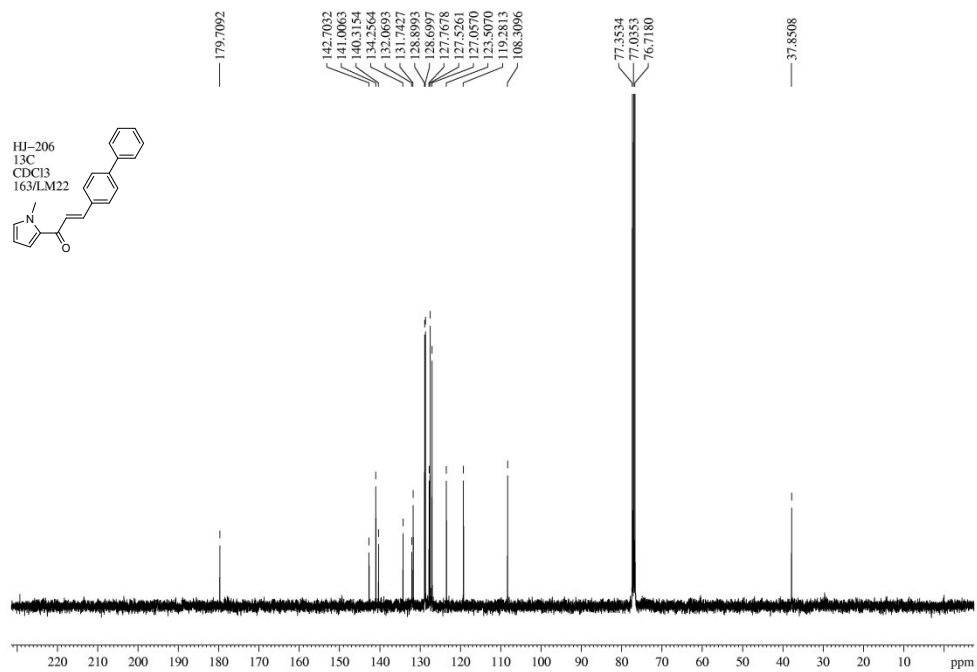

<sup>13</sup>C NMR spectrum of compound **3f**

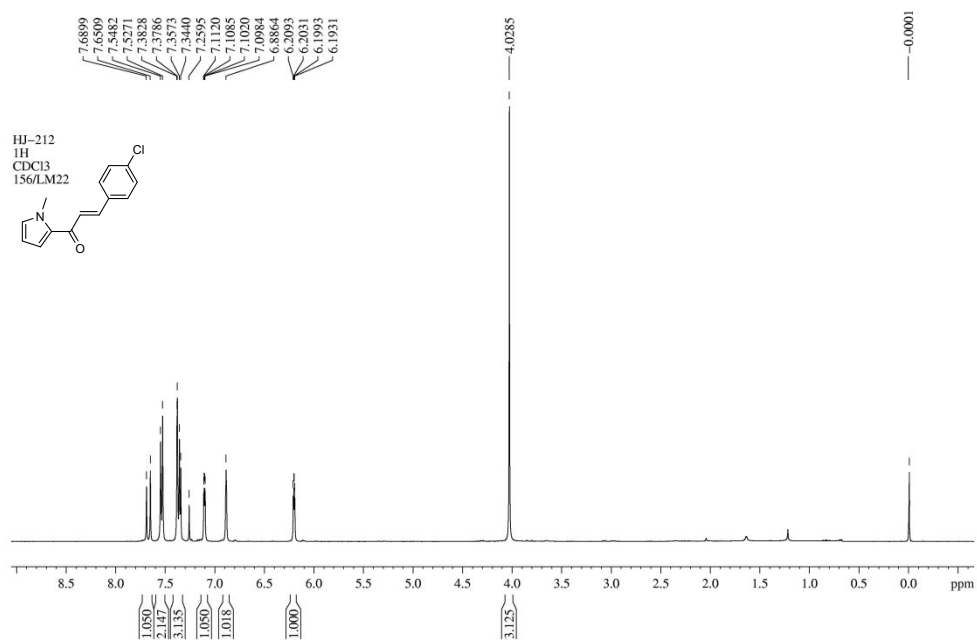

$^1\text{H}$  NMR spectrum of compound **3g**

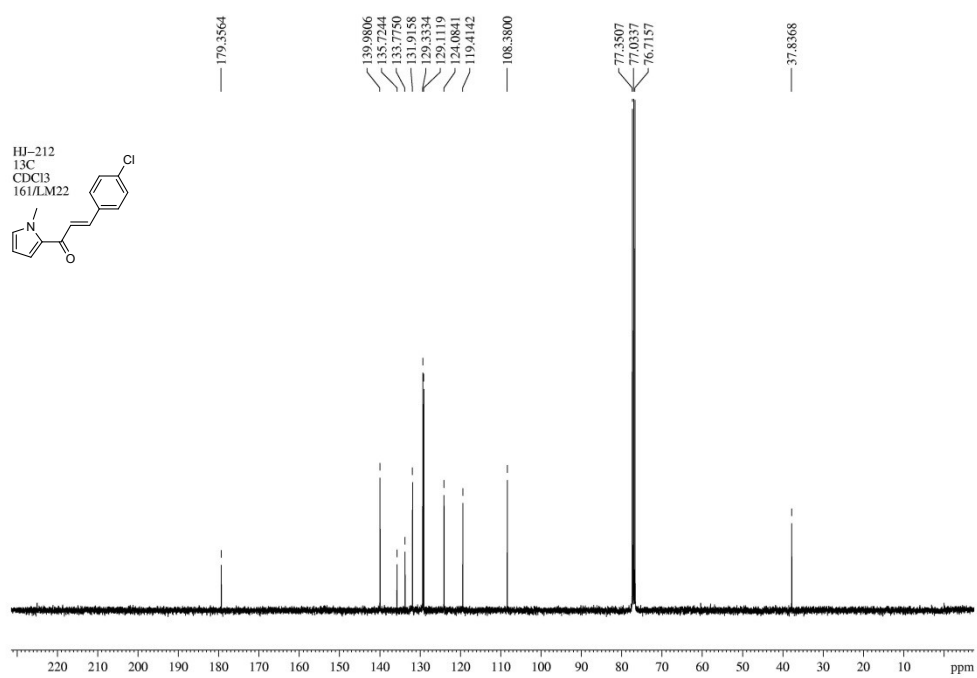

$^{13}\text{C}$  NMR spectrum of compound **3g**

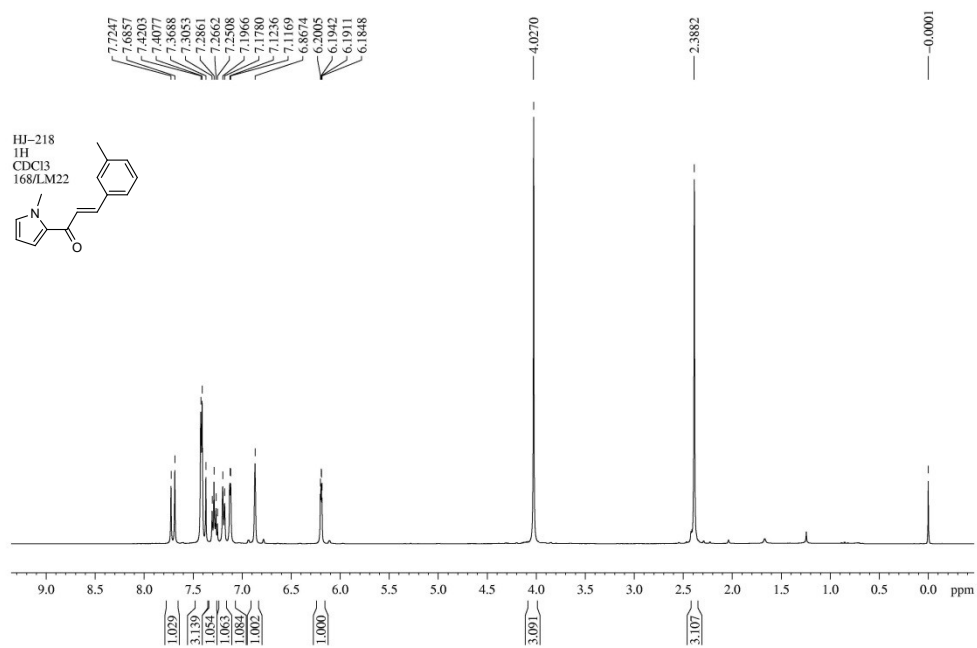

<sup>1</sup>H NMR spectrum of compound **3h**

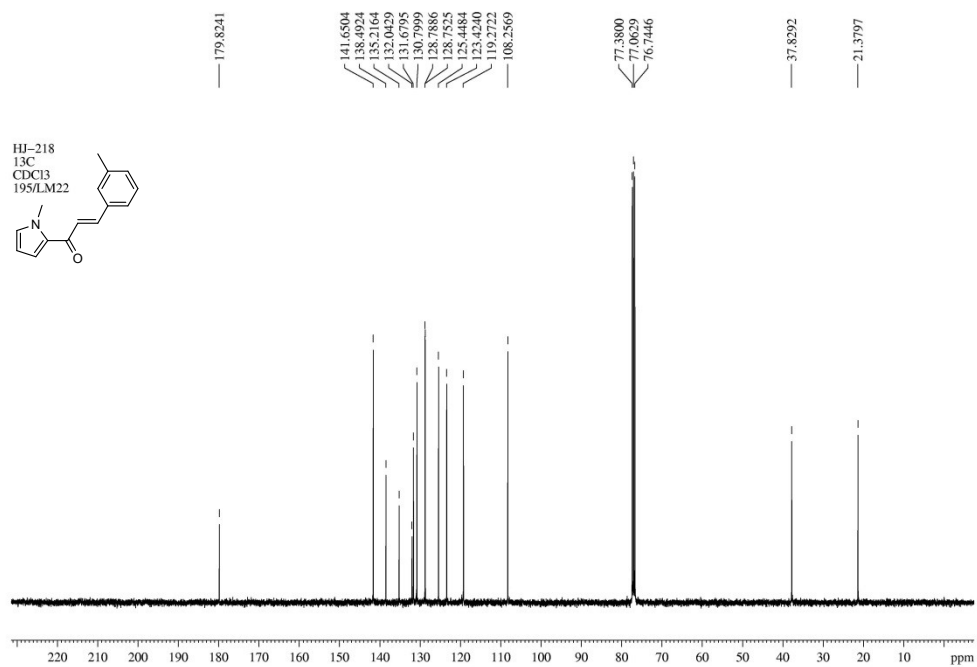

<sup>13</sup>C NMR spectrum of compound **3h**



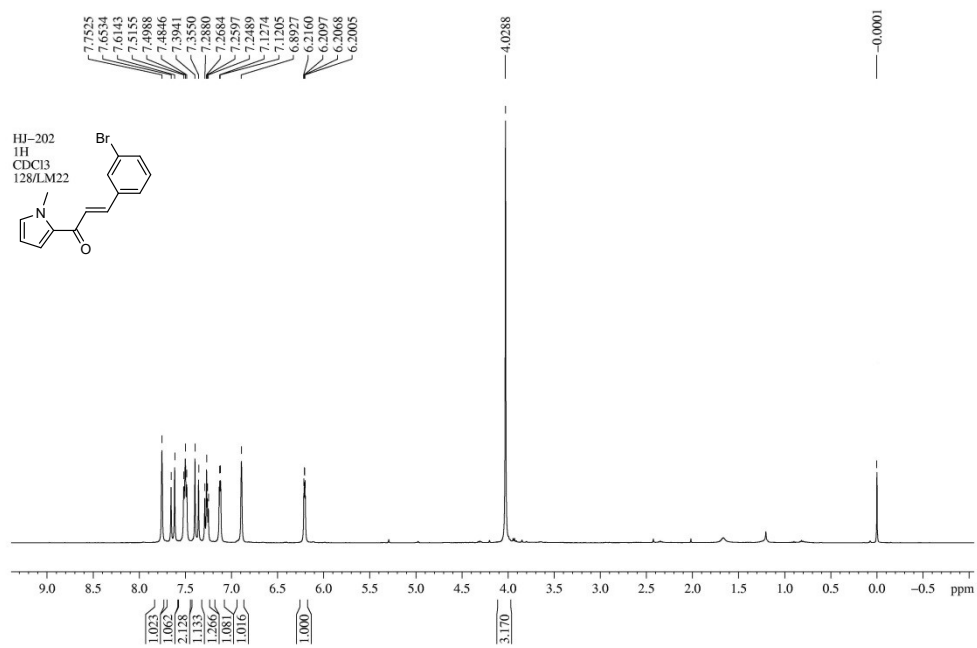

$^1\text{H}$  NMR spectrum of compound **3i**

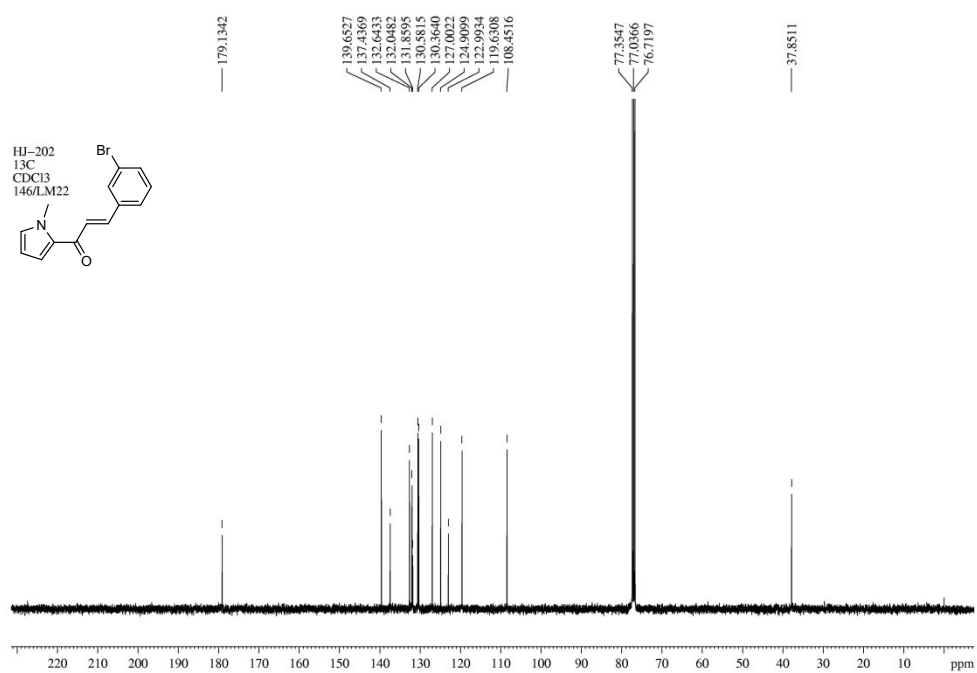

$^{13}\text{C}$  NMR spectrum of compound **3i**

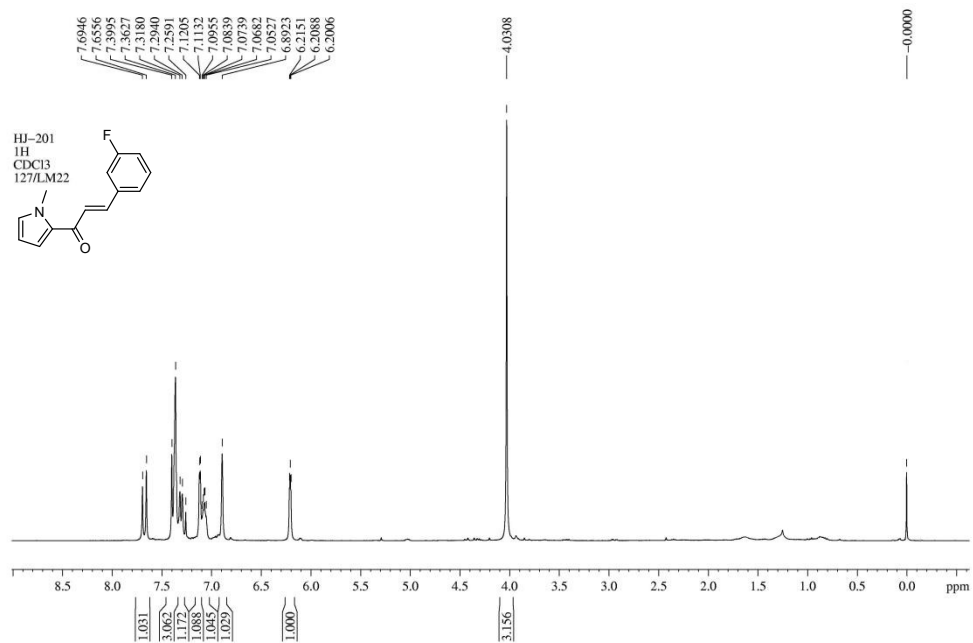

<sup>1</sup>H NMR spectrum of compound **3j**

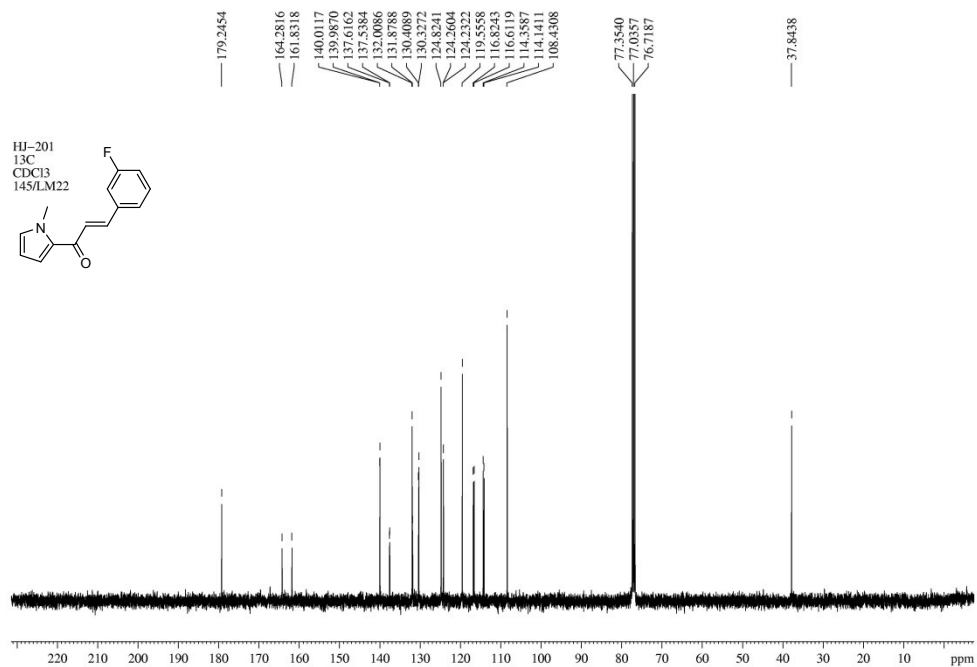

<sup>13</sup>C NMR spectrum of compound **3j**

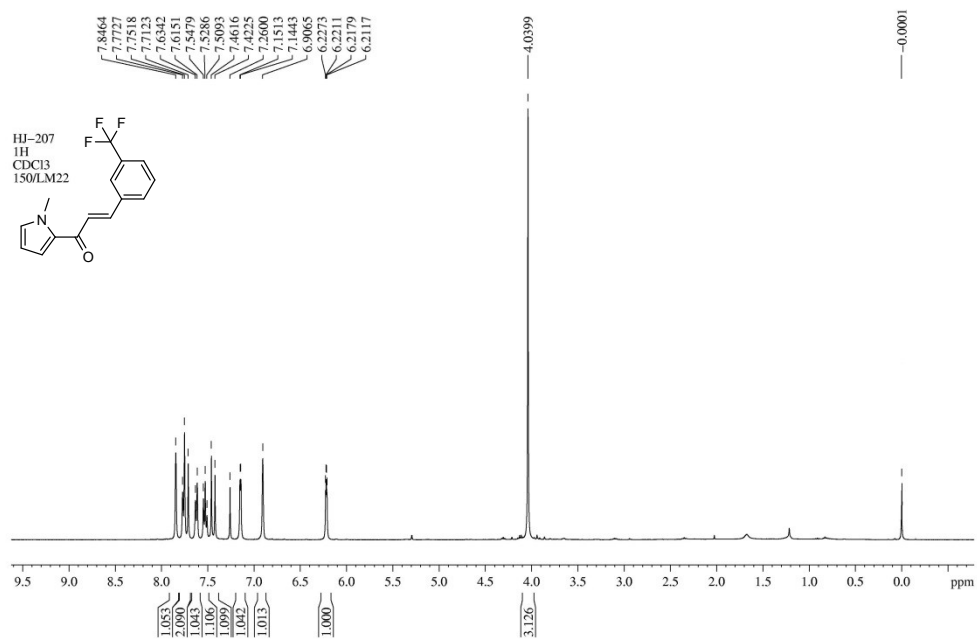

<sup>1</sup>H NMR spectrum of compound **3k**

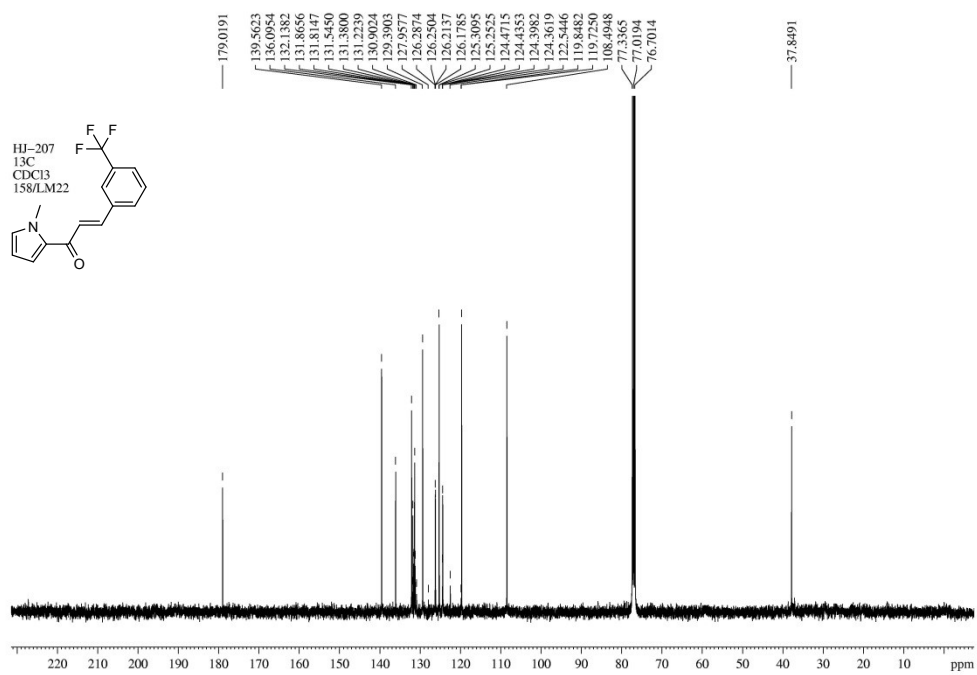

<sup>13</sup>C NMR spectrum of compound **3k**

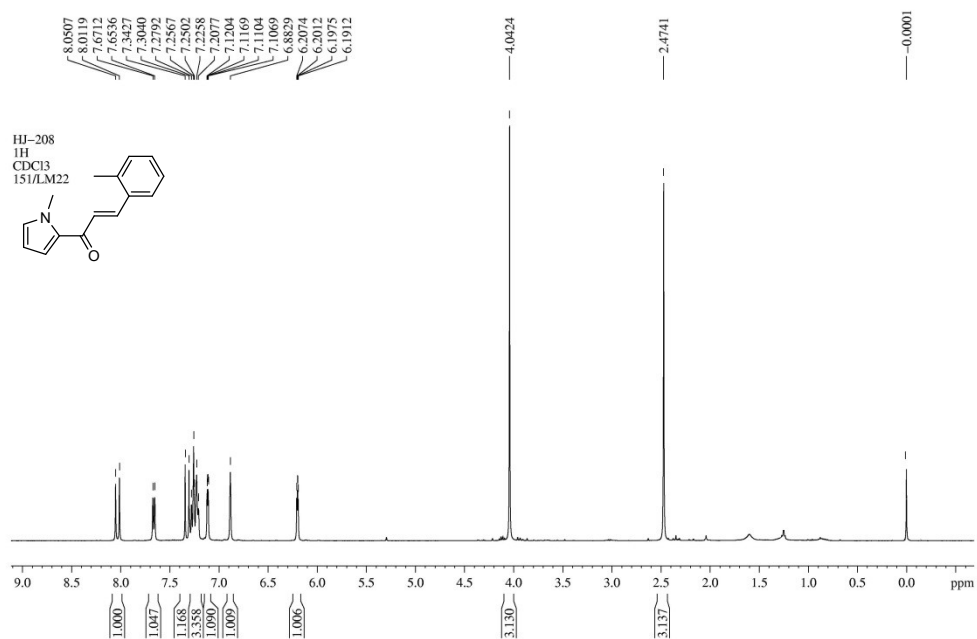

<sup>1</sup>H NMR spectrum of compound **31**

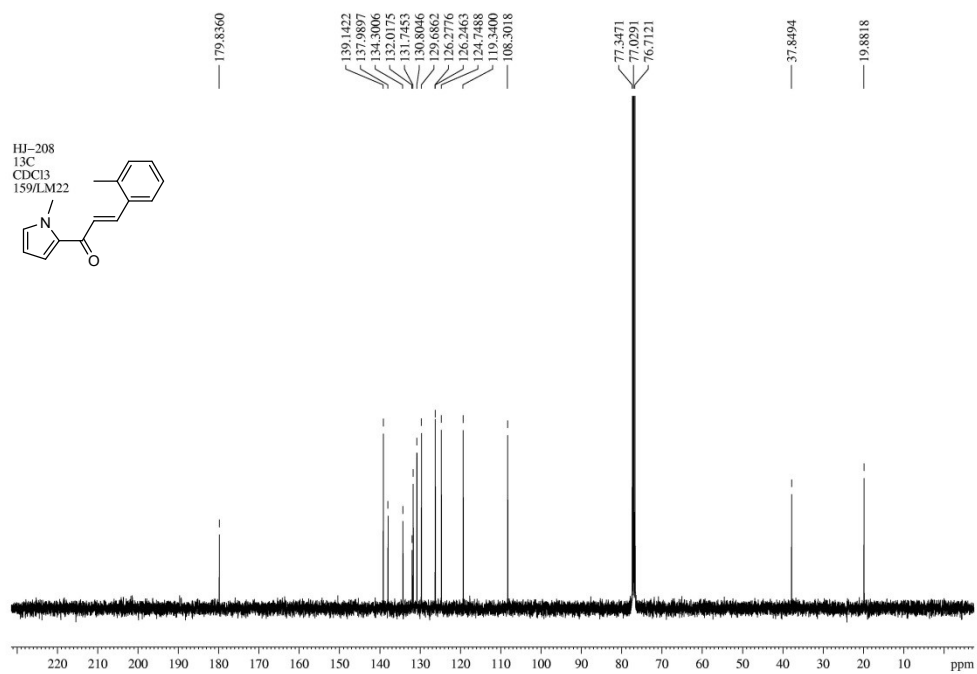

<sup>13</sup>C NMR spectrum of compound **31**

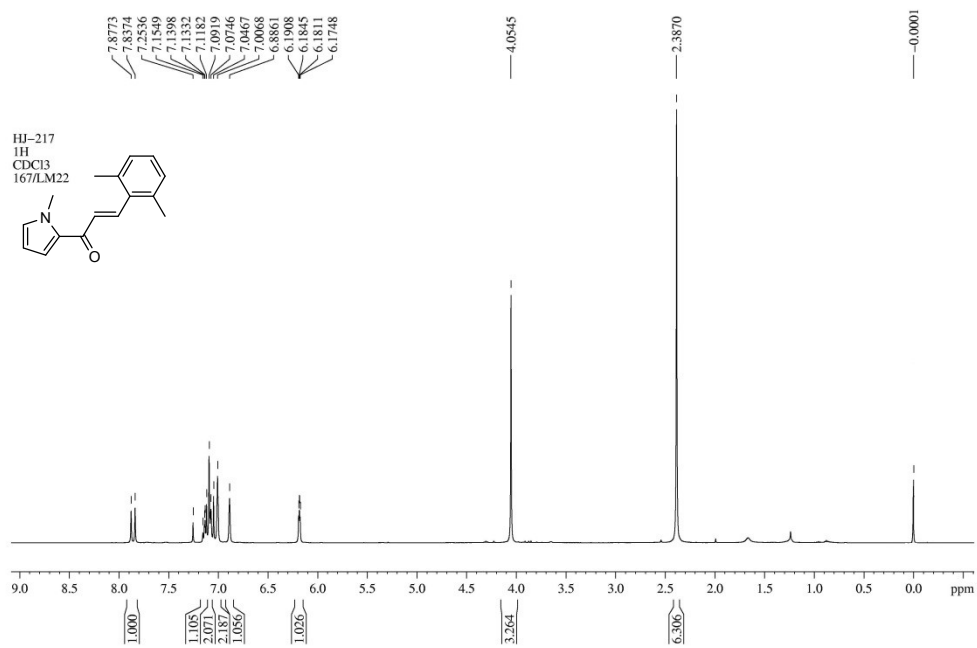

<sup>1</sup>H NMR spectrum of compound **3m**

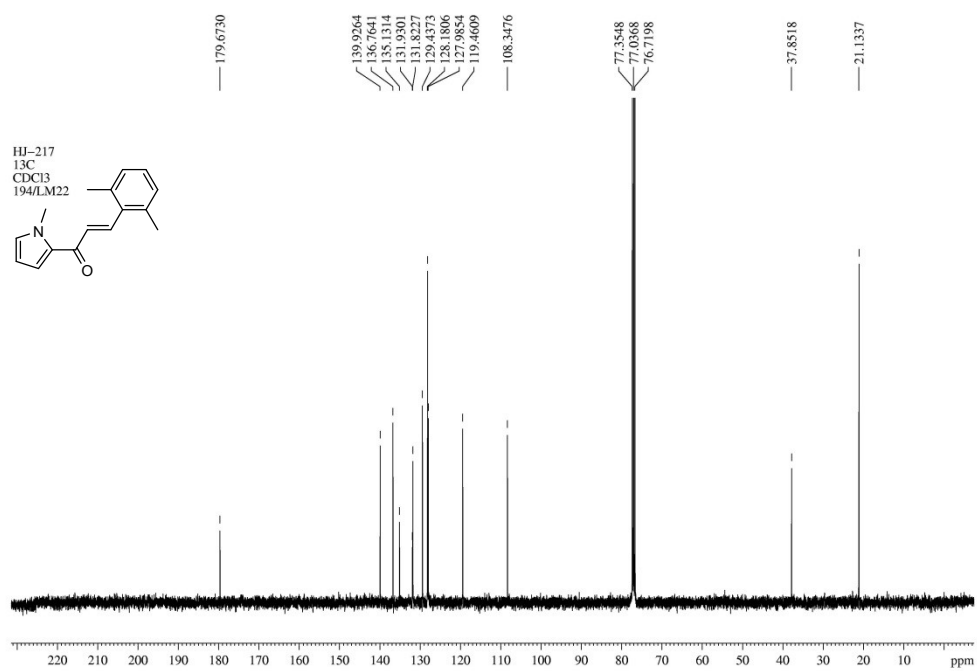

$^{13}\text{C}$  NMR spectrum of compound **3m**



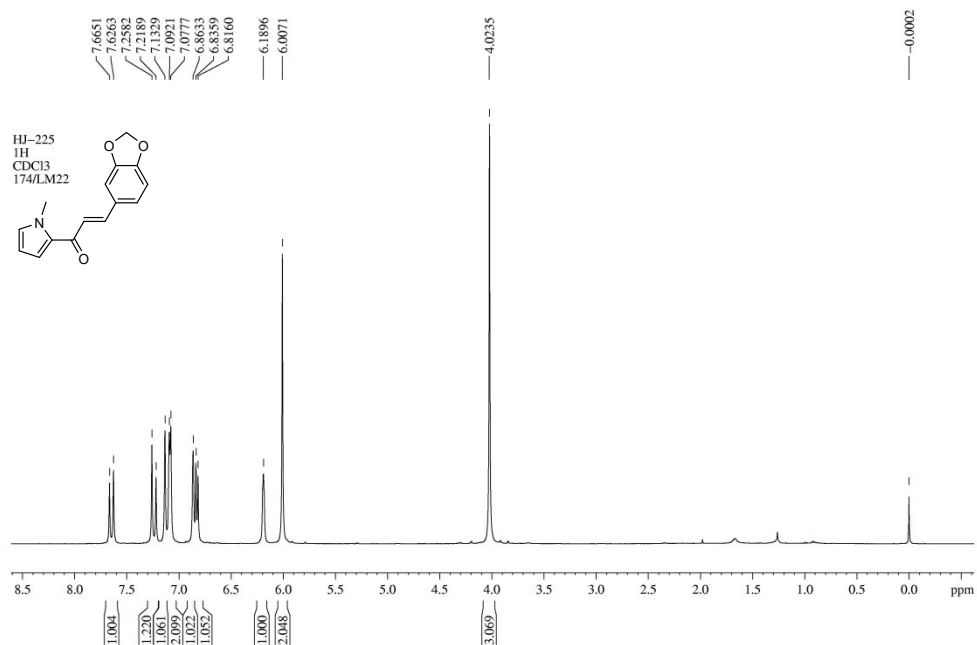

<sup>1</sup>H NMR spectrum of compound **3n**

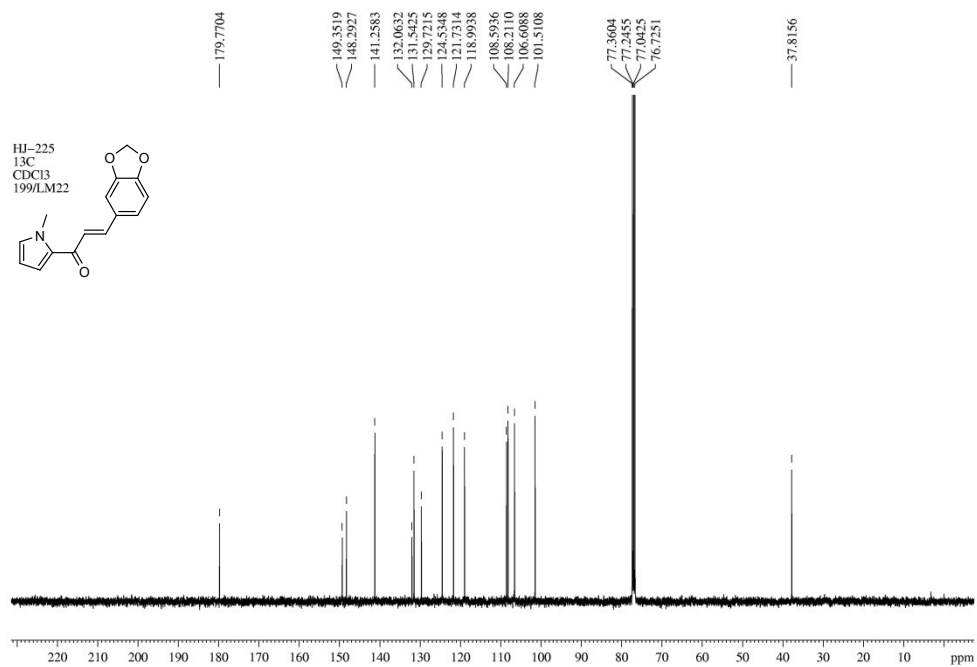

<sup>13</sup>C NMR spectrum of compound **3n**

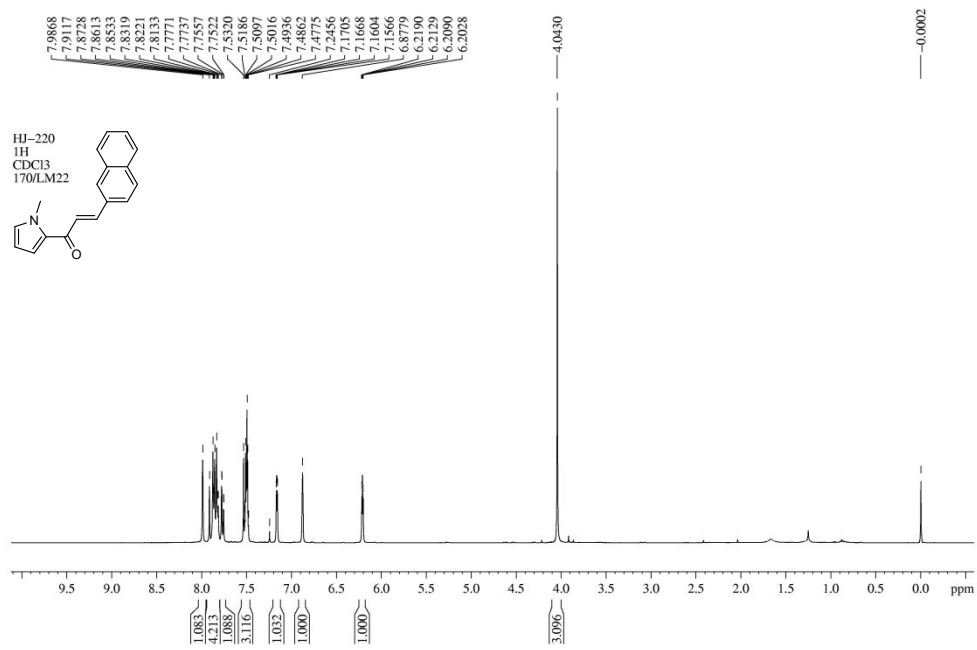

<sup>1</sup>H NMR spectrum of compound **3o**

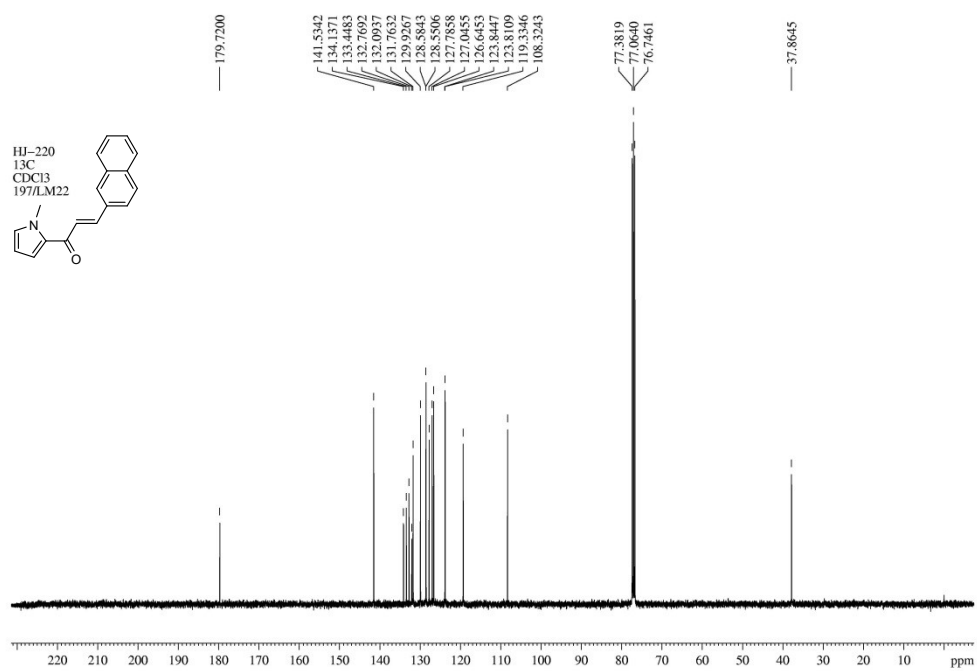

$^{13}\text{C}$  NMR spectrum of compound **3o**

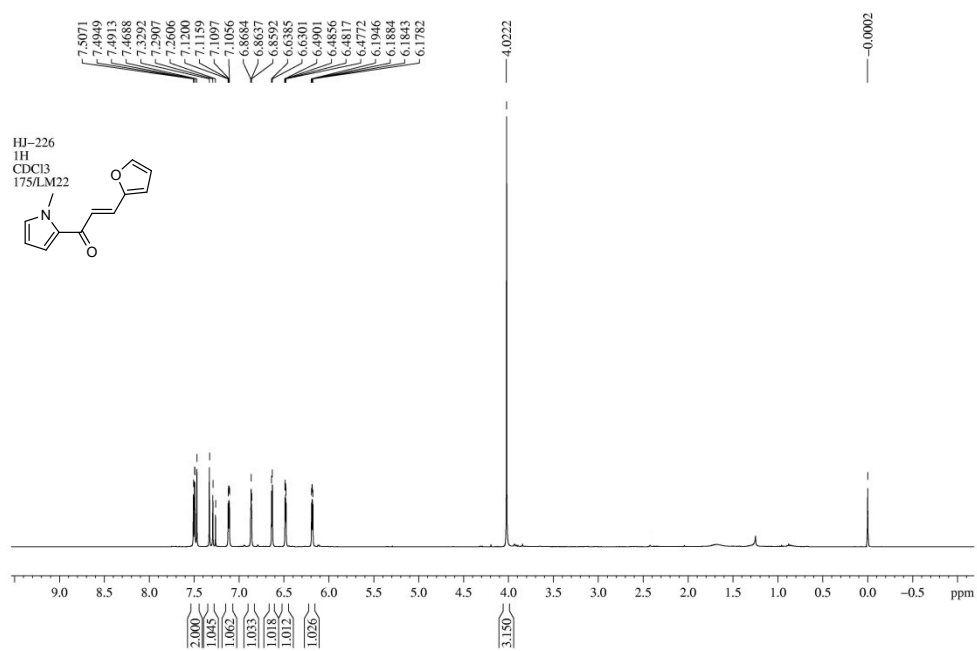

<sup>1</sup>H NMR spectrum of compound **3p**

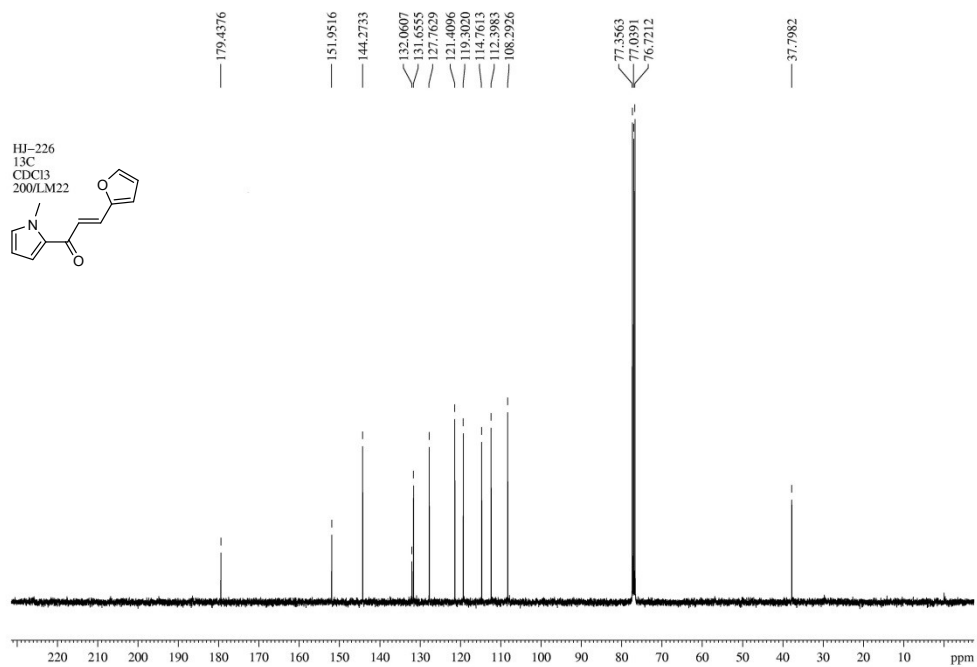

<sup>13</sup>C NMR spectrum of compound **3p**

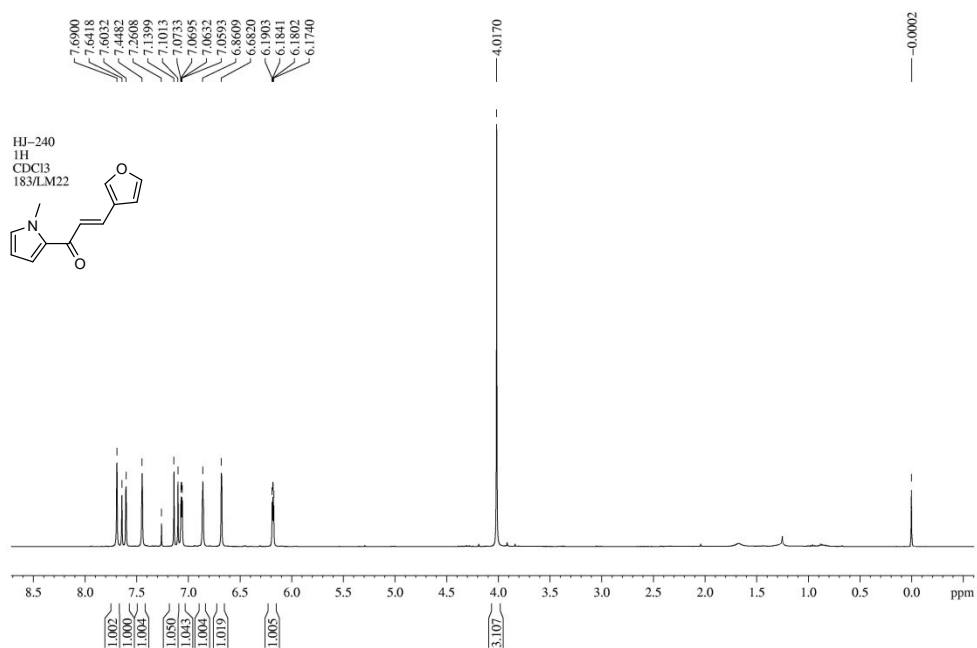

<sup>1</sup>H NMR spectrum of compound **3q**

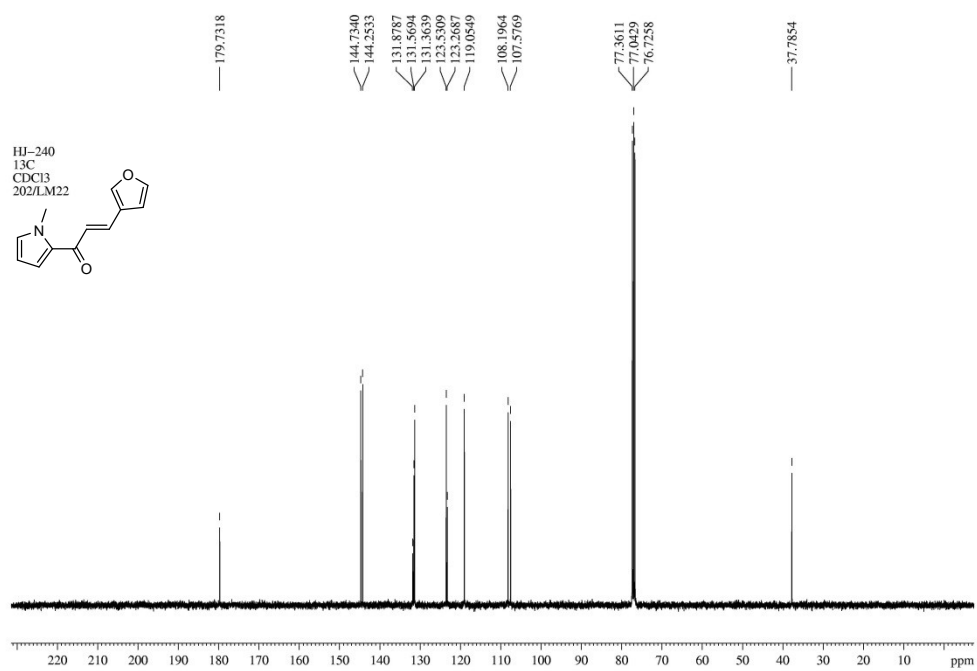

$^{13}\text{C}$  NMR spectrum of compound **3q**

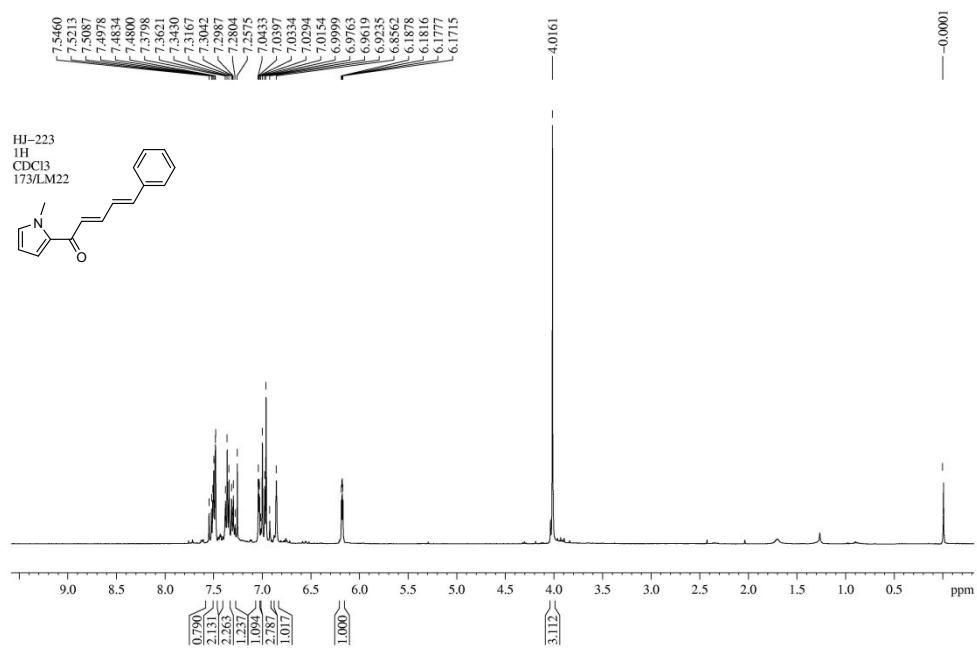

<sup>1</sup>H NMR spectrum of compound **3r**

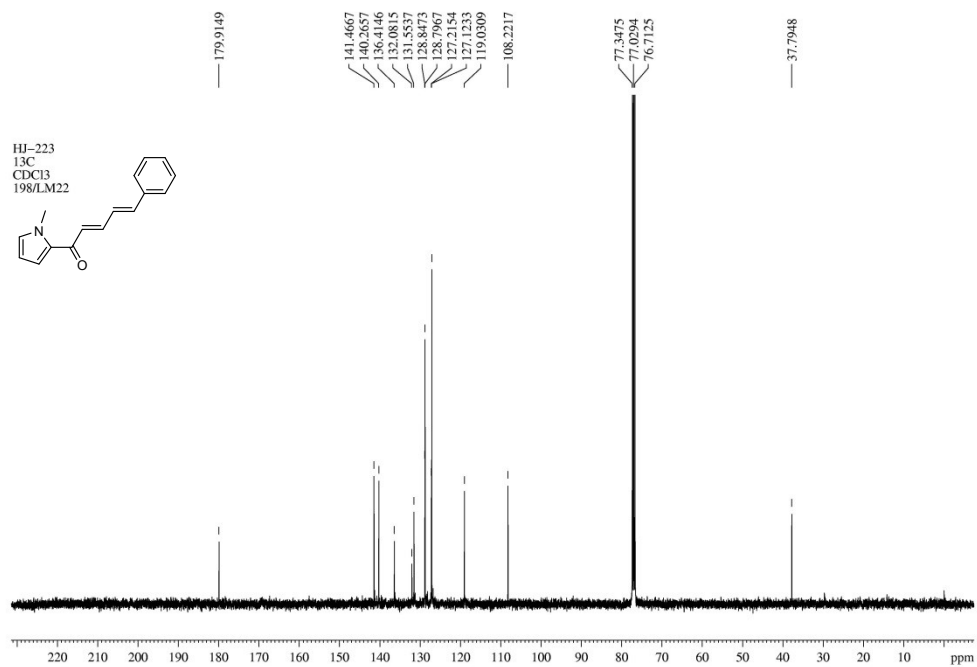

<sup>13</sup>C NMR spectrum of compound **3r**

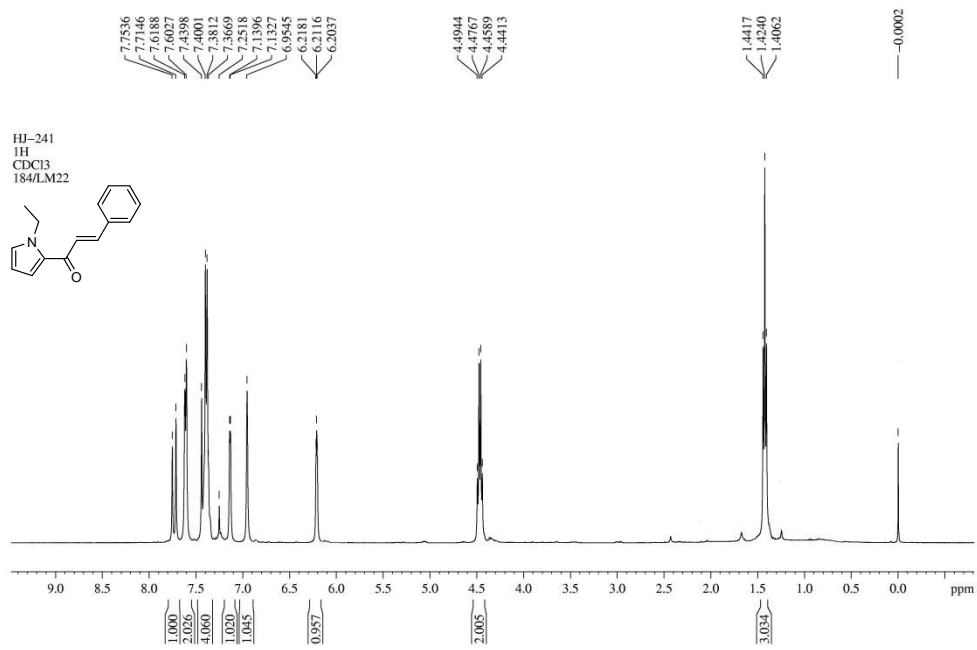

<sup>1</sup>H NMR spectrum of compound **4a**



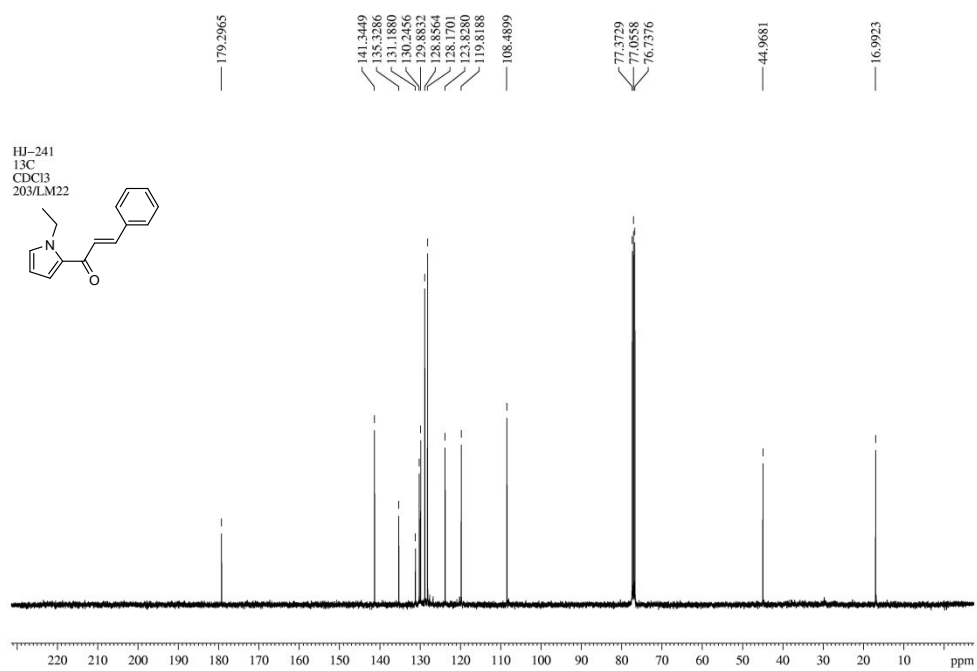

$^{13}\text{C}$  NMR spectrum of compound **4a**

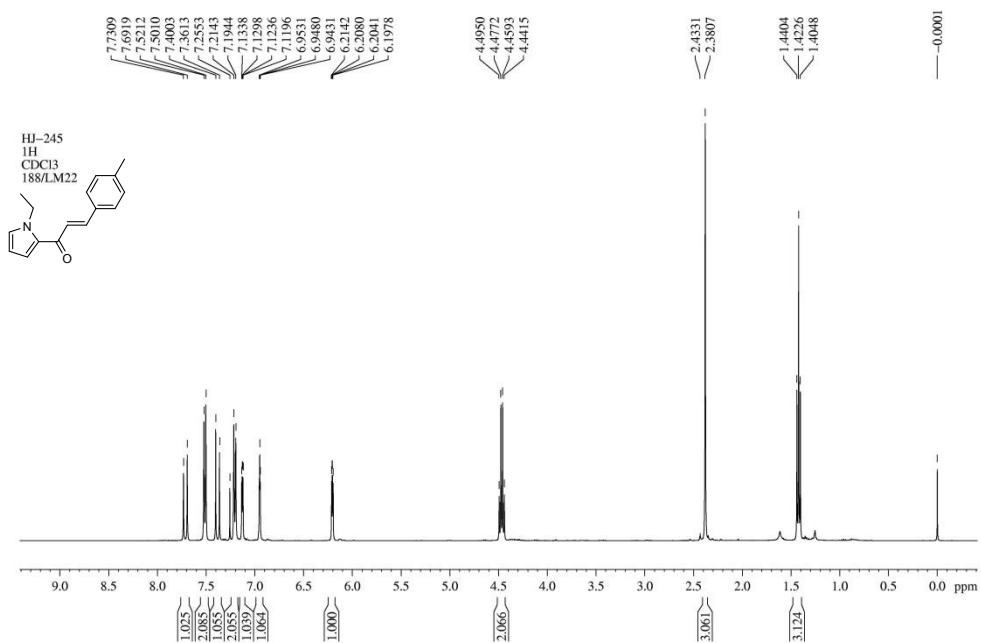

<sup>1</sup>H NMR spectrum of compound **4b**

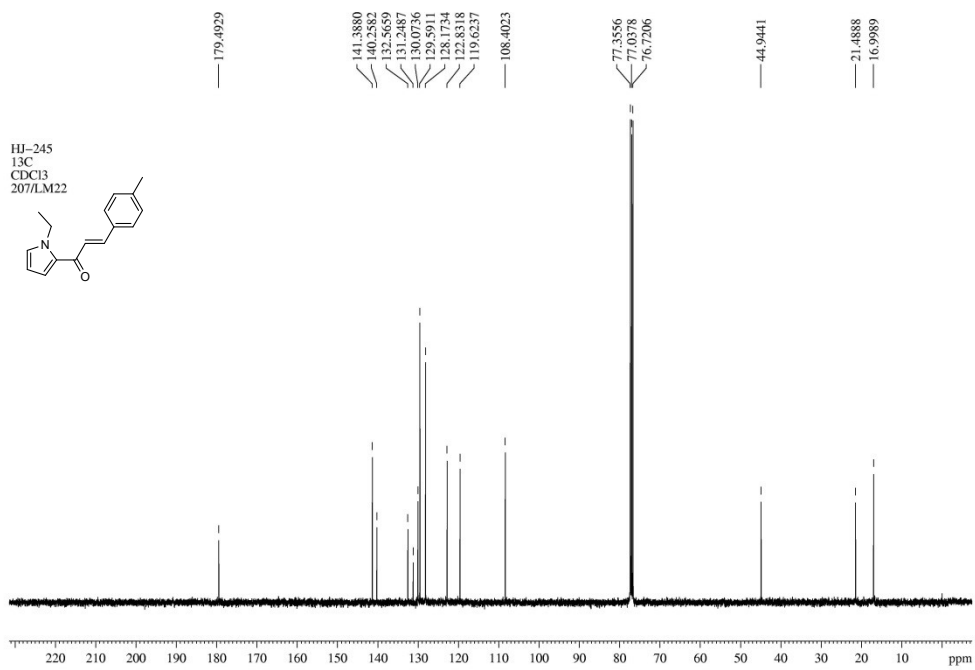

<sup>13</sup>C NMR spectrum of compound **4b**

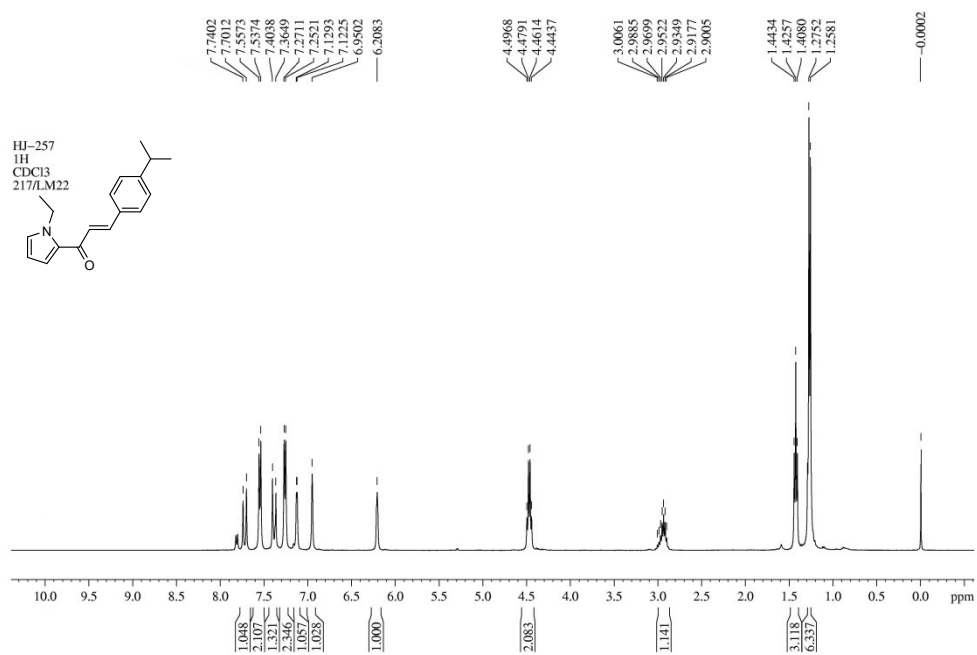

<sup>1</sup>H NMR spectrum of compound **4c**

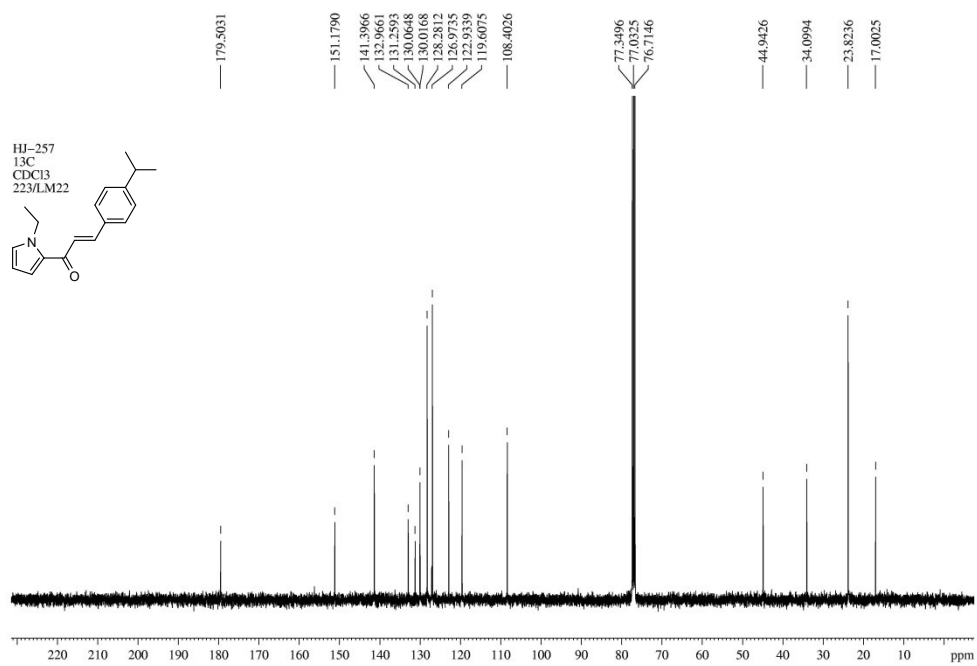

$^{13}\text{C}$  NMR spectrum of compound **4c**

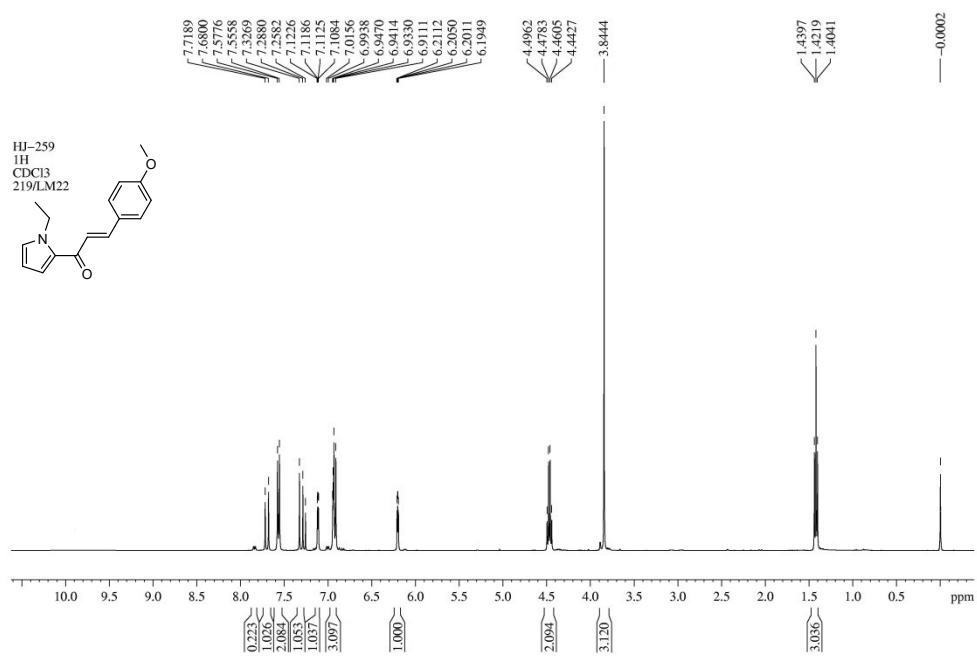

<sup>1</sup>H NMR spectrum of compound **4d**

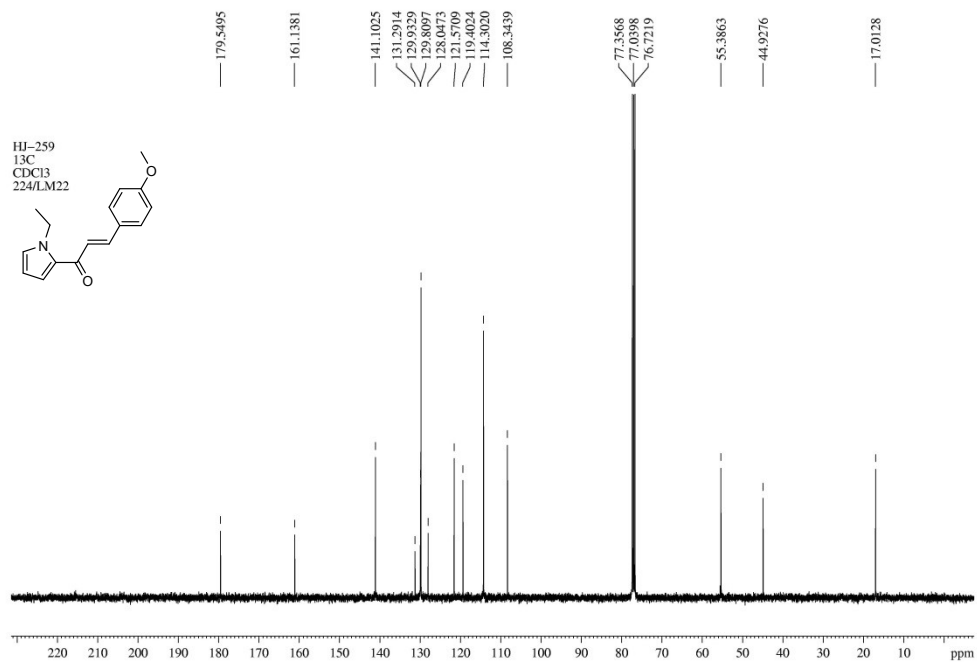

<sup>13</sup>C NMR spectrum of compound **4d**

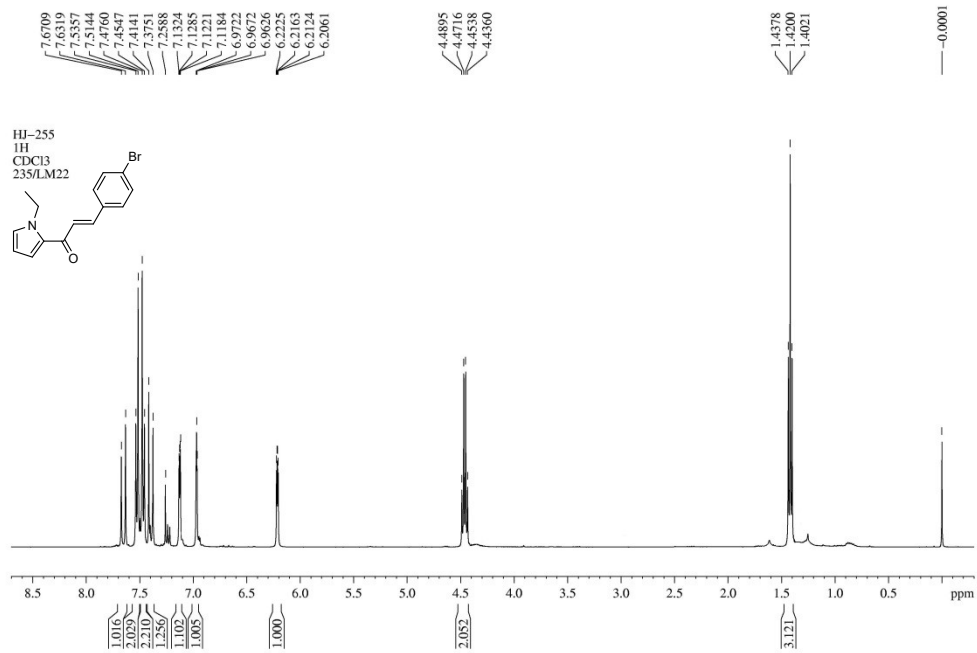

<sup>1</sup>H NMR spectrum of compound **4e**

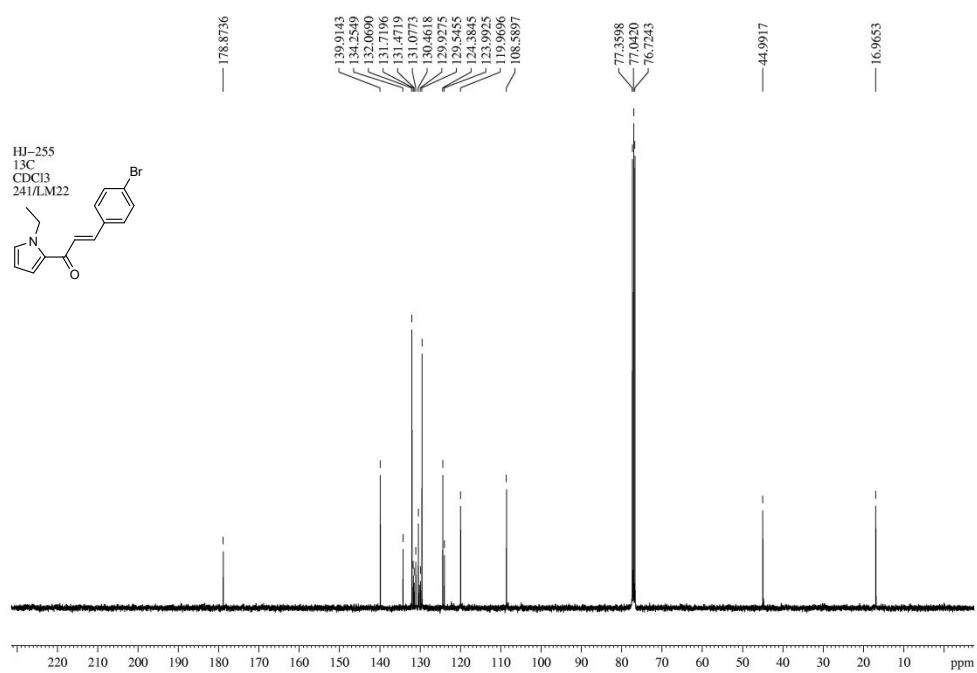

<sup>13</sup>C NMR spectrum of compound **4e**

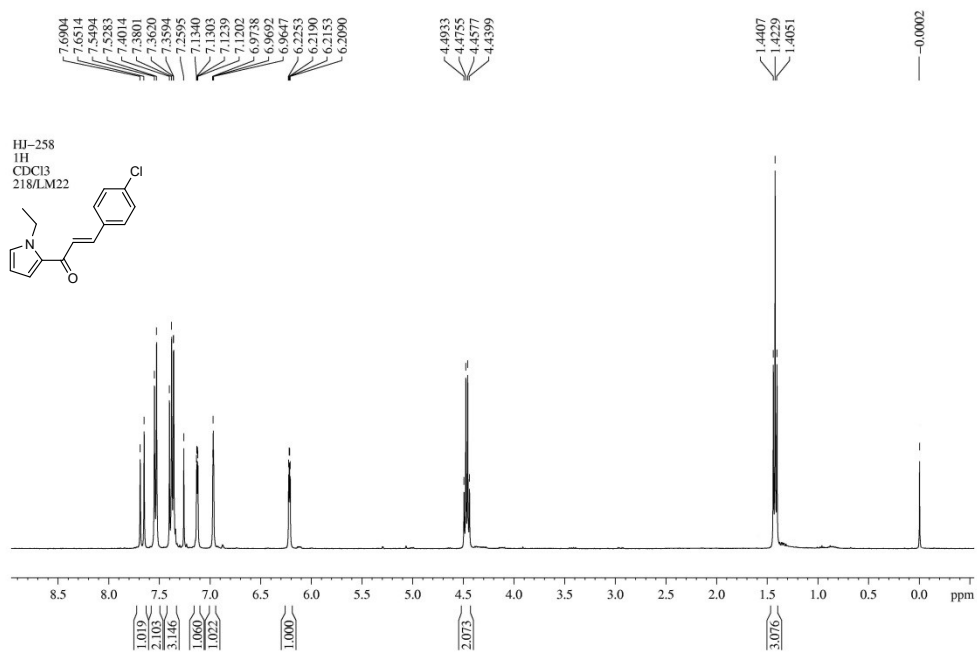

<sup>1</sup>H NMR spectrum of compound **4f**

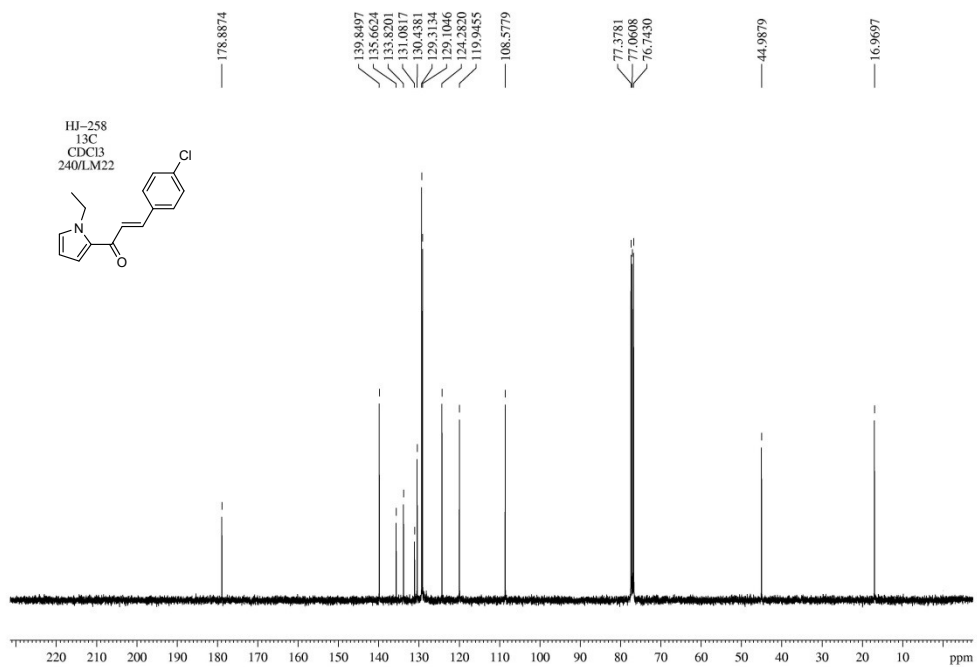

<sup>13</sup>C NMR spectrum of compound **4f**



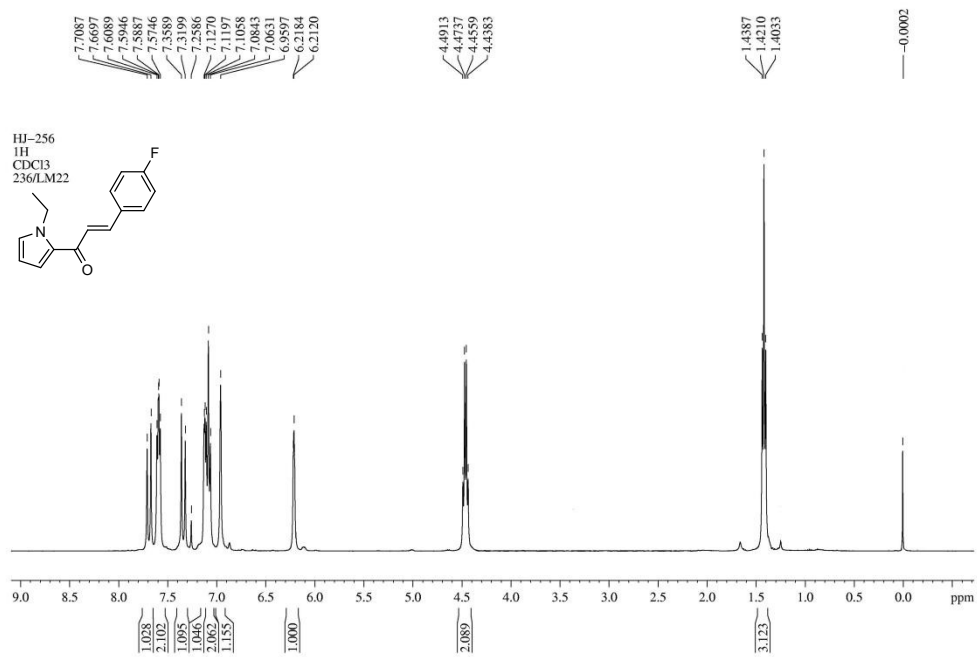

<sup>1</sup>H NMR spectrum of compound **4g**

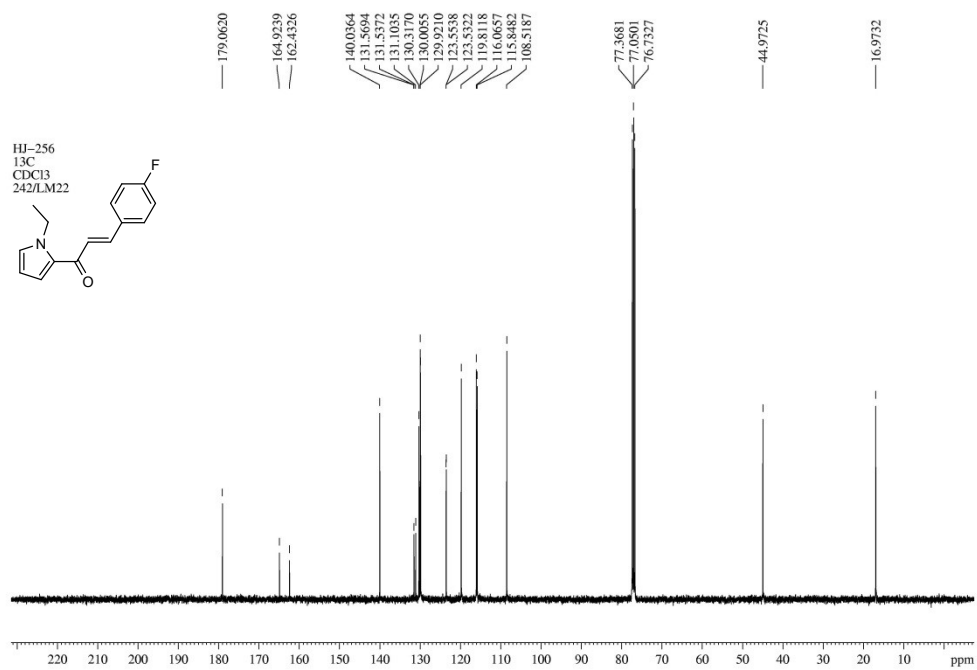

$^{13}\text{C}$  NMR spectrum of compound **4g**

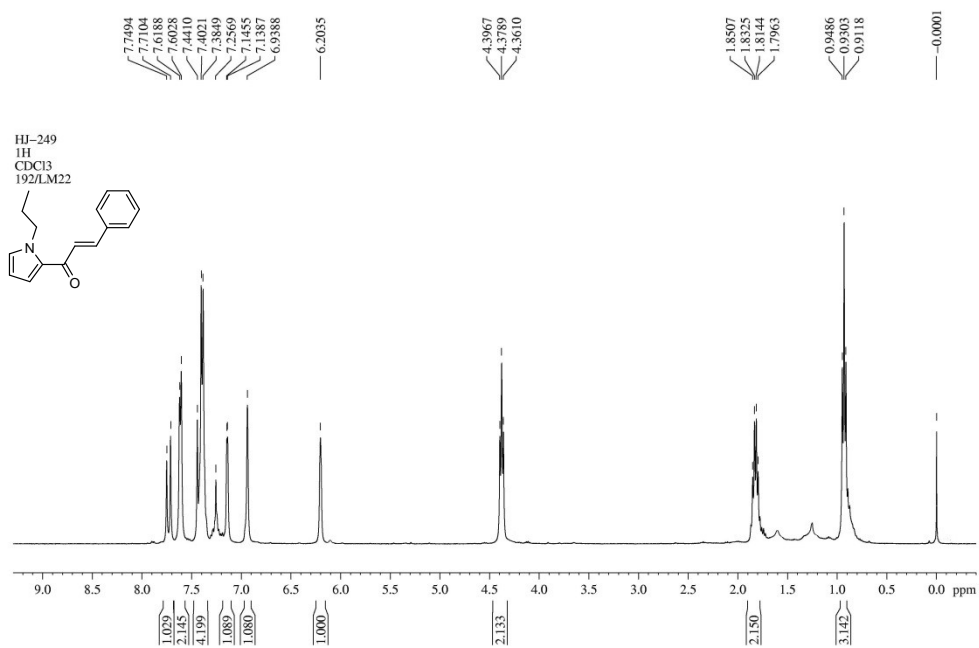

<sup>1</sup>H NMR spectrum of compound **4h**

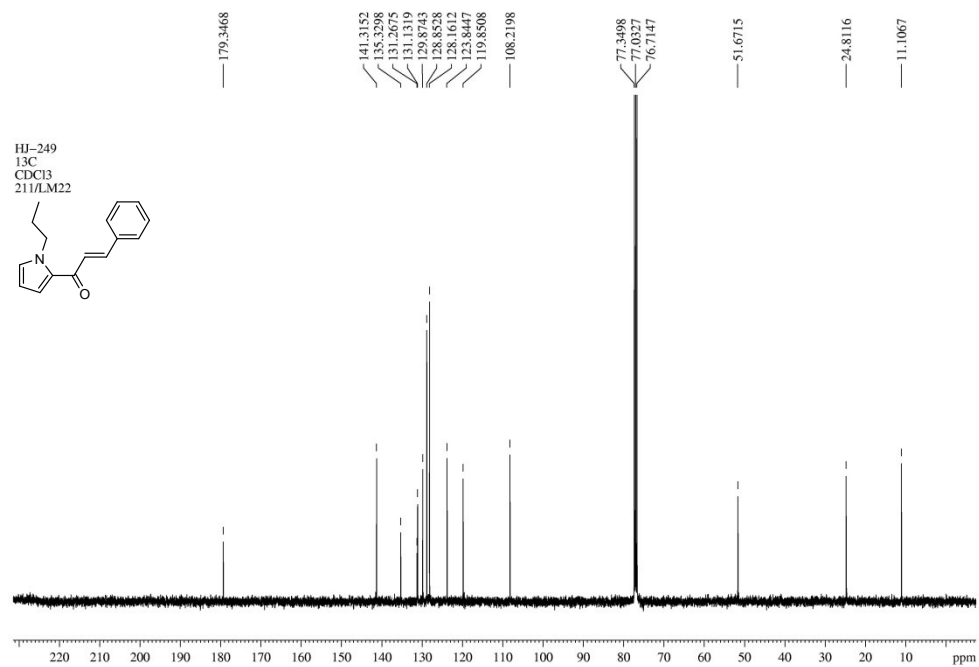

<sup>13</sup>C NMR spectrum of compound **4h**

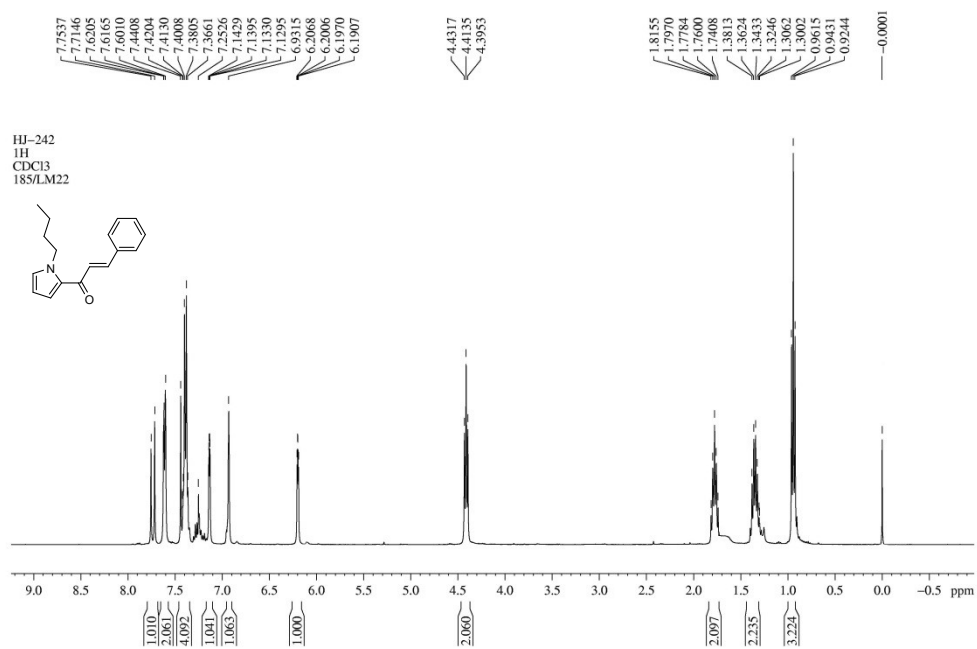

<sup>1</sup>H NMR spectrum of compound **4i**

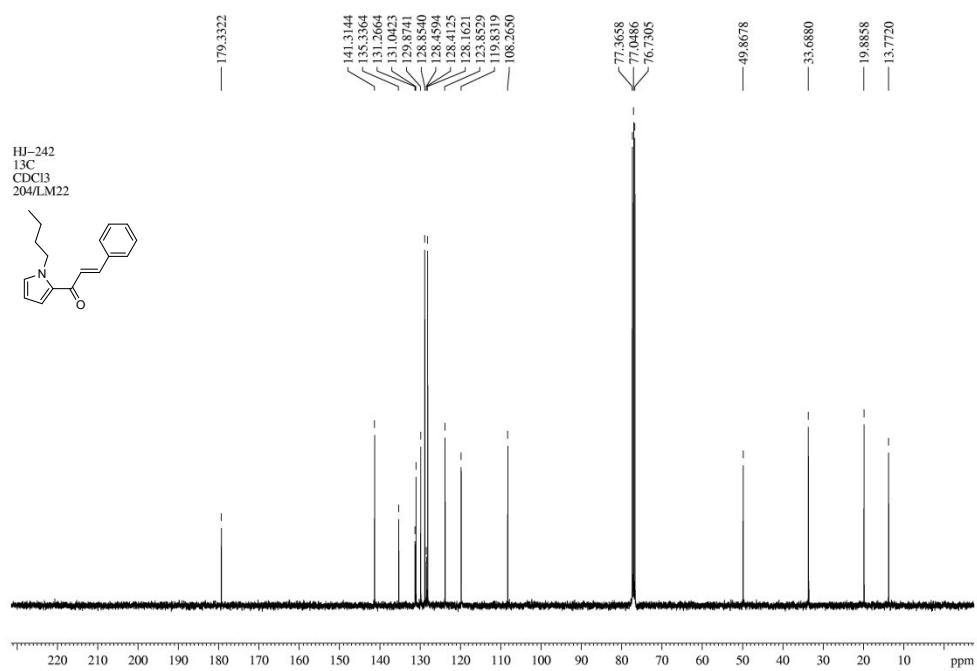

$^{13}\text{C}$  NMR spectrum of compound **4i**

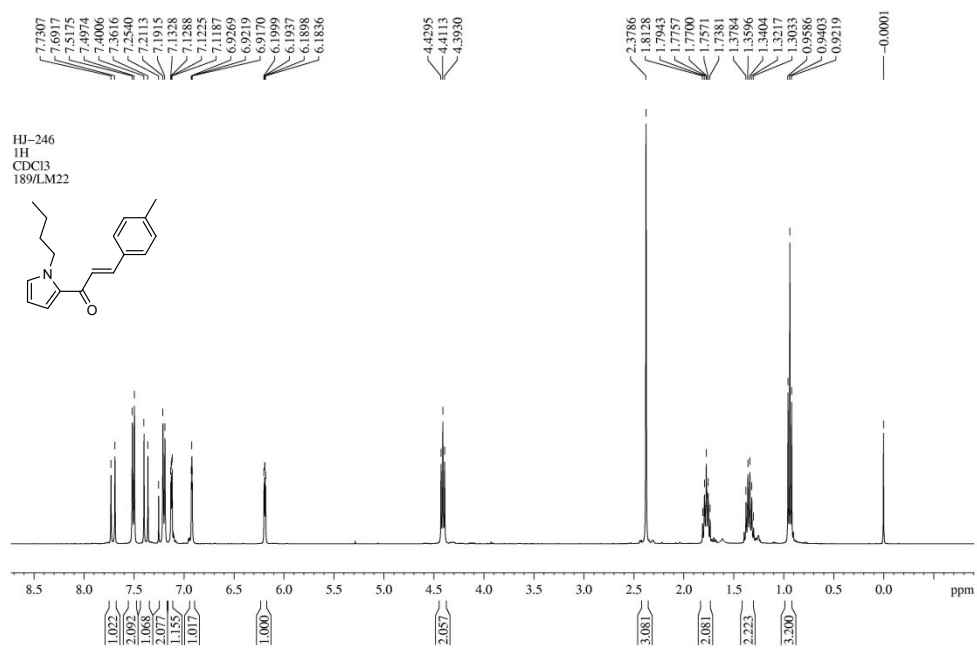

<sup>1</sup>H NMR spectrum of compound **4j**

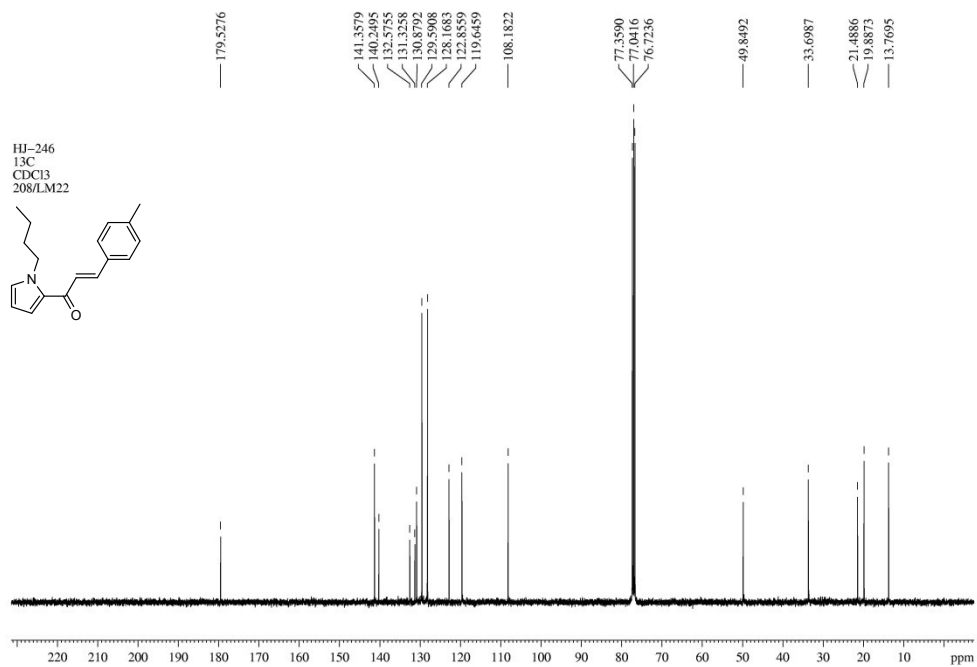

<sup>13</sup>C NMR spectrum of compound **4j**

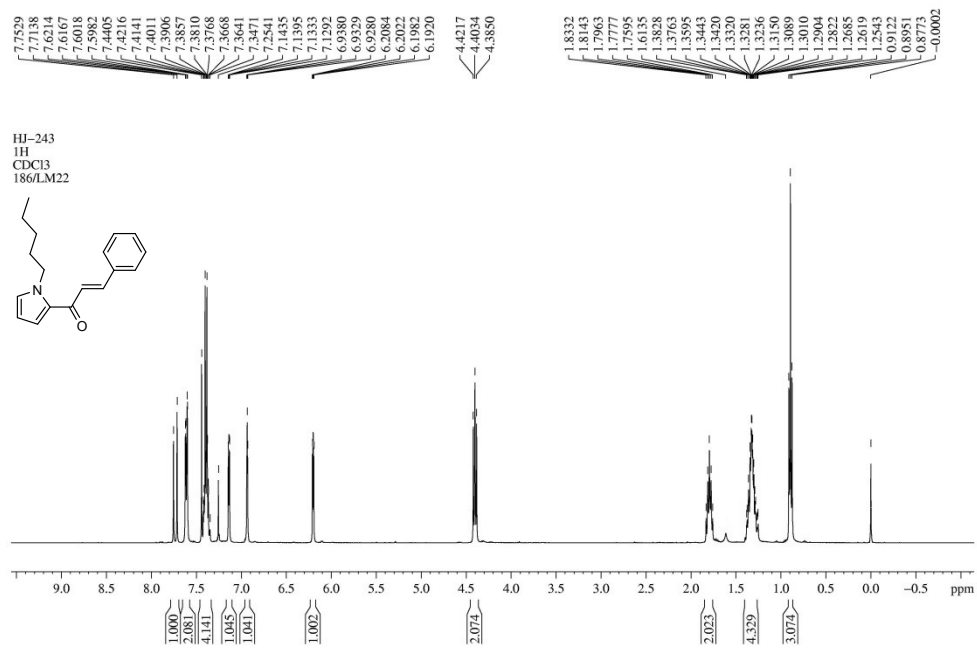

<sup>1</sup>H NMR spectrum of compound **4k**

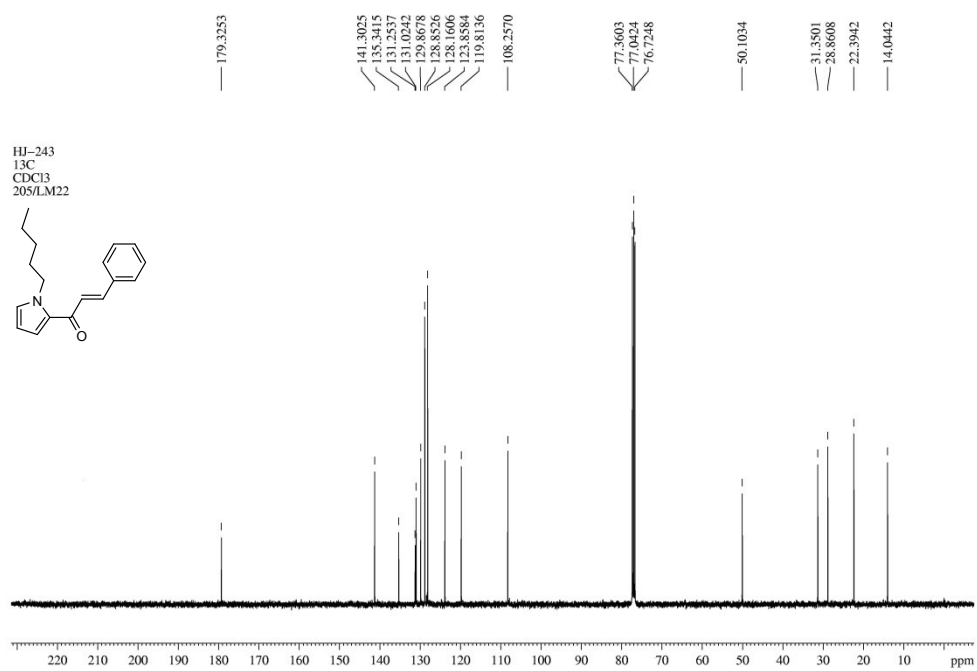

$^{13}\text{C}$  NMR spectrum of compound **4k**



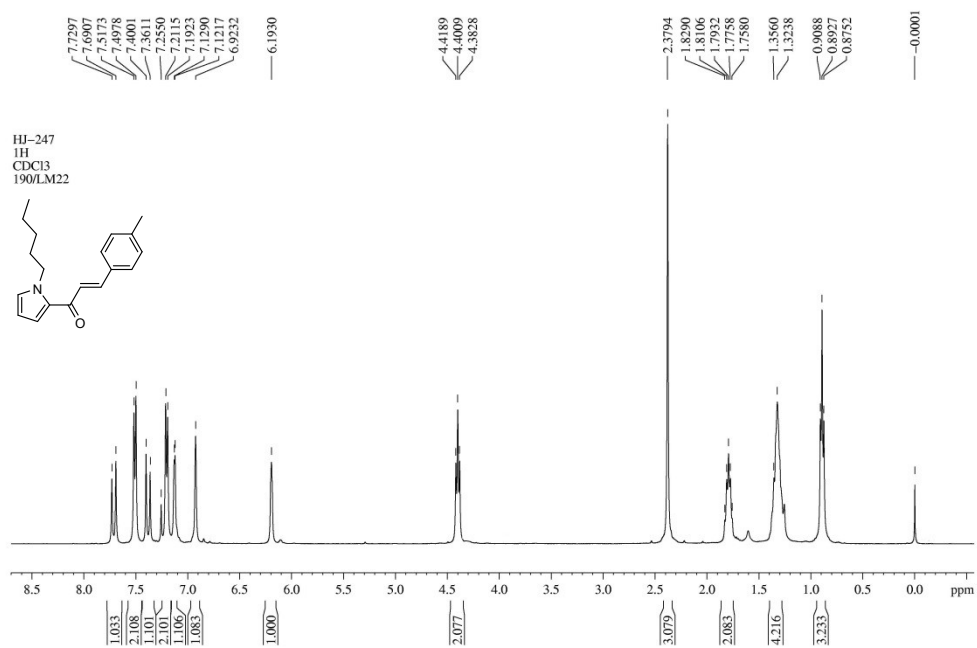

<sup>1</sup>H NMR spectrum of compound **41**

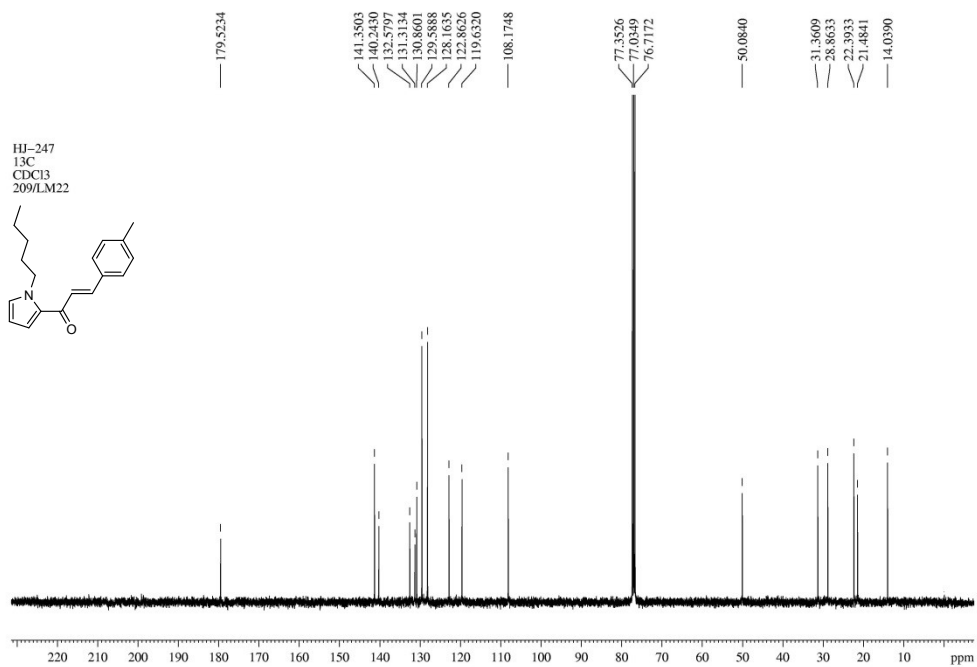

<sup>13</sup>C NMR spectrum of compound **41**

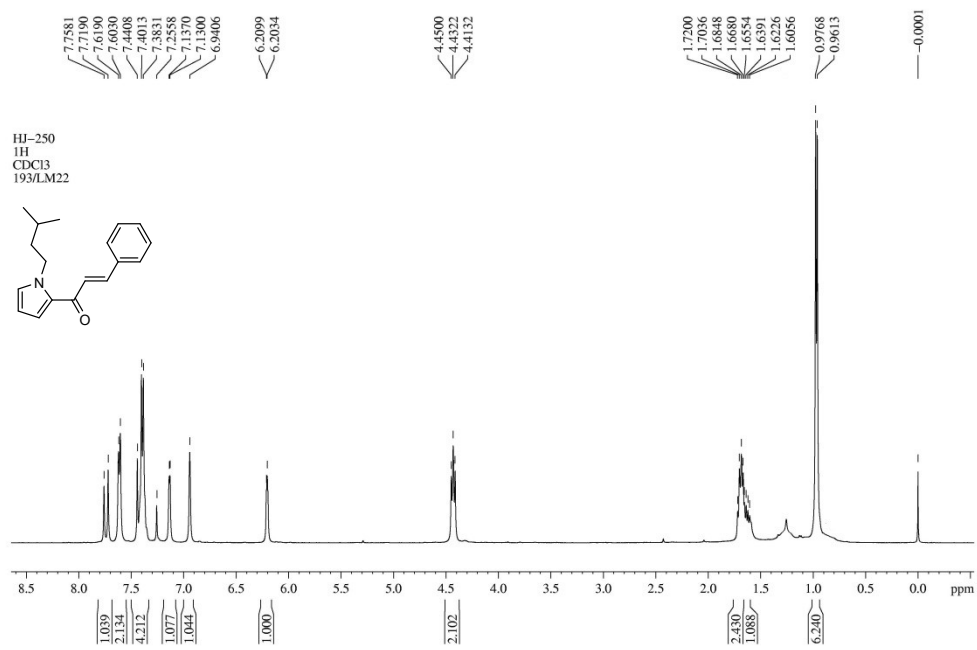

<sup>1</sup>H NMR spectrum of compound **4m**

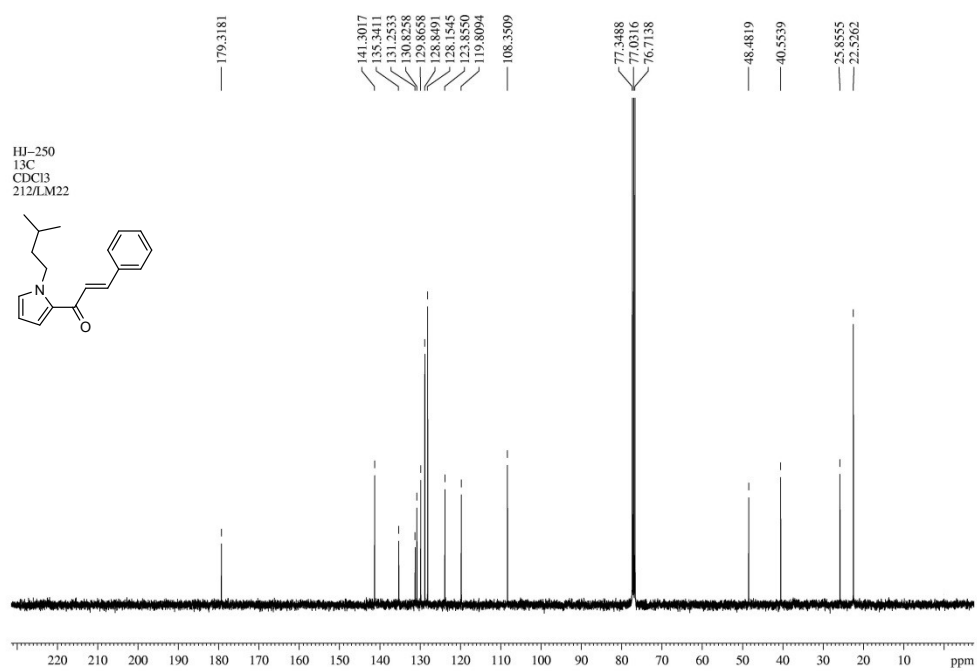

$^{13}\text{C}$  NMR spectrum of compound **4m**

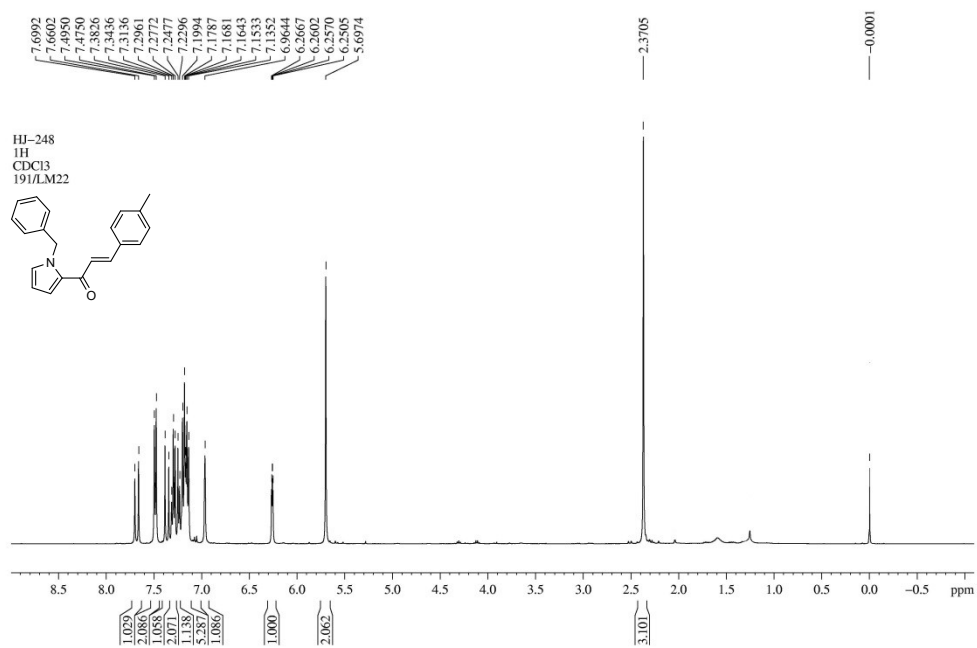

<sup>1</sup>H NMR spectrum of compound **4n**

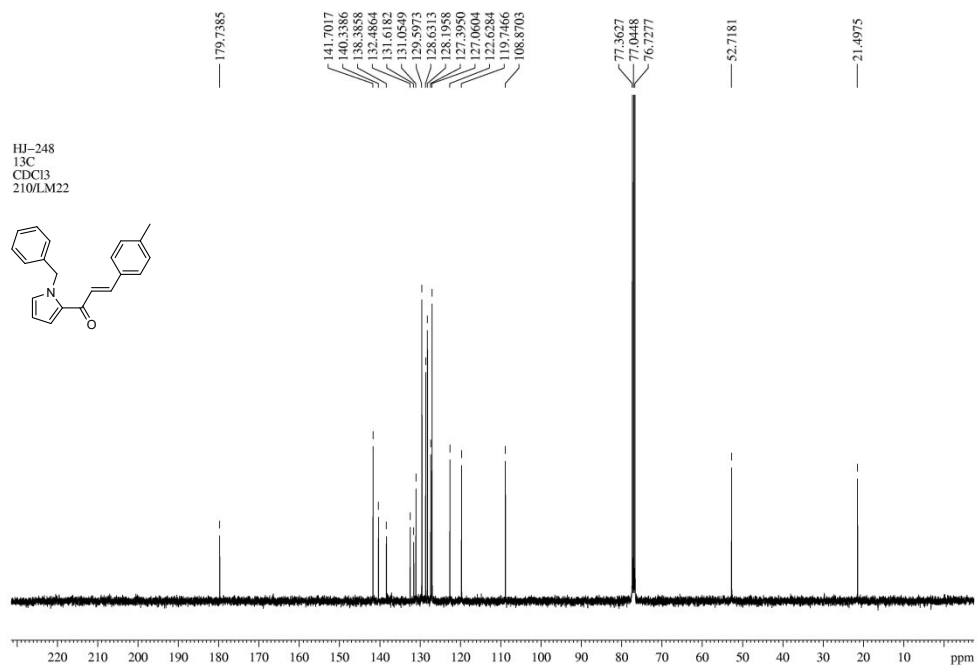

<sup>13</sup>C NMR spectrum of compound **4n**

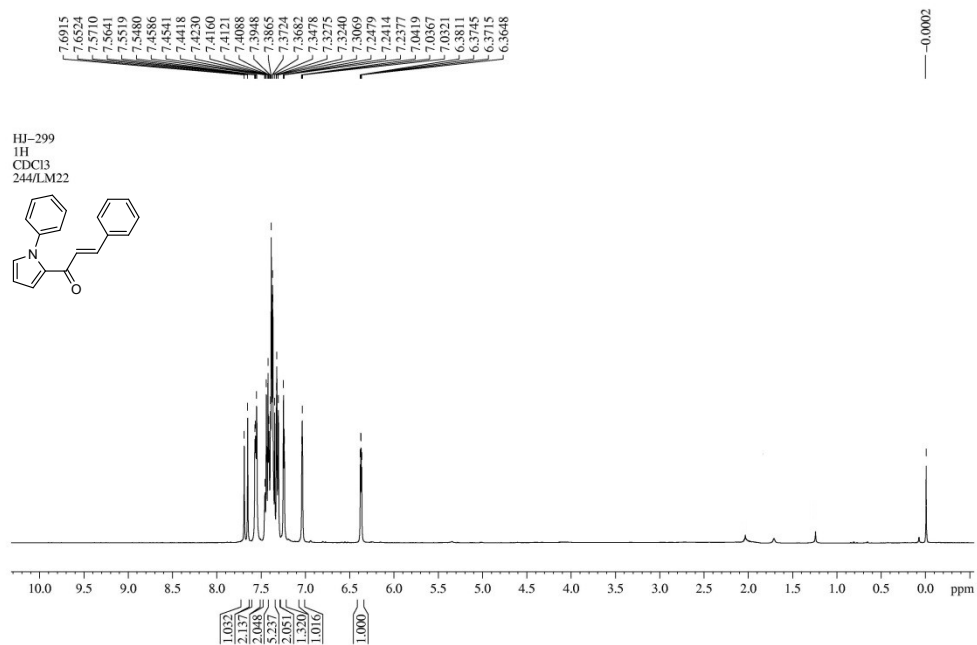

<sup>1</sup>H NMR spectrum of compound **40**

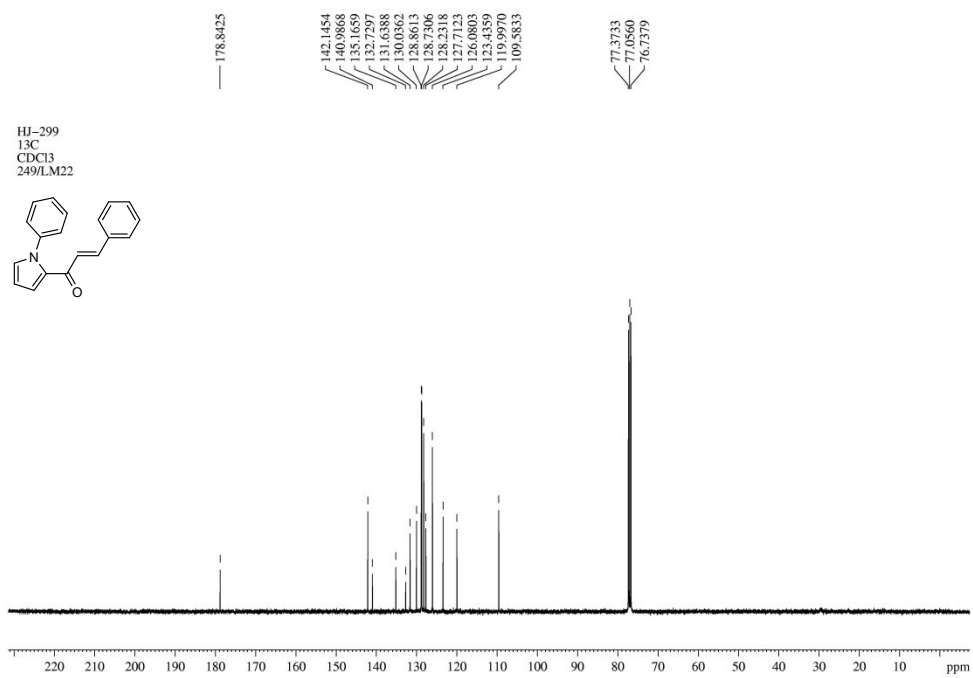

$^{13}\text{C}$  NMR spectrum of compound **40**

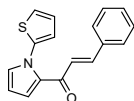

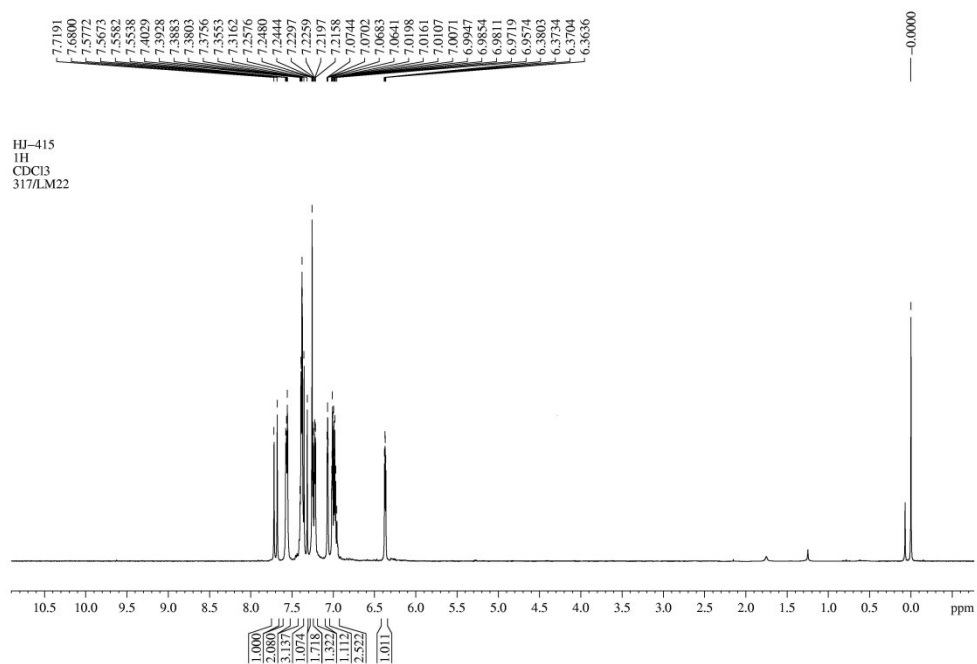

<sup>1</sup>H NMR spectrum of compound **4p**

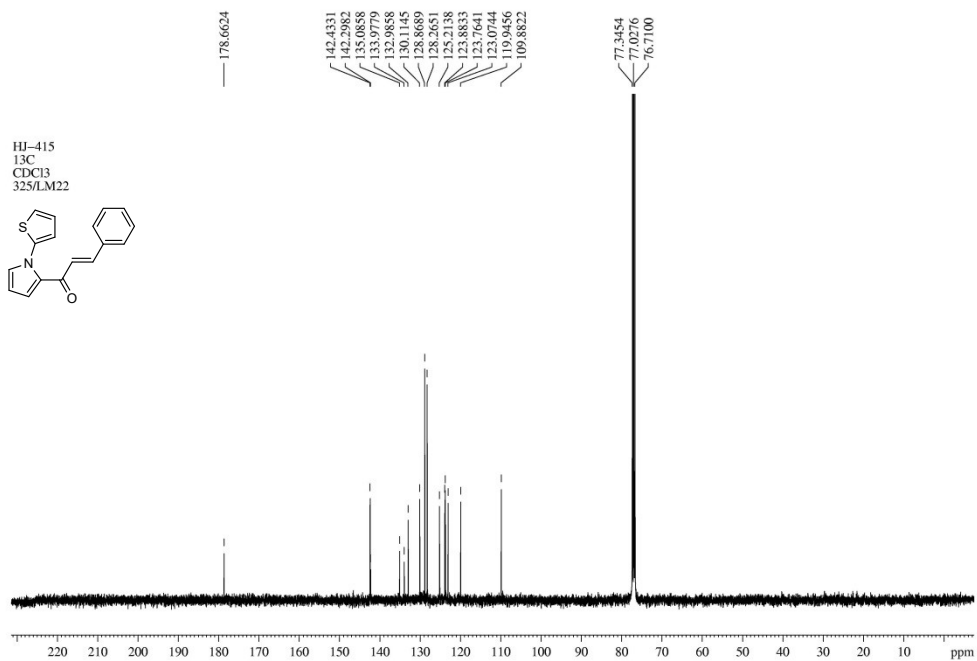

<sup>13</sup>C NMR spectrum of compound **4p**

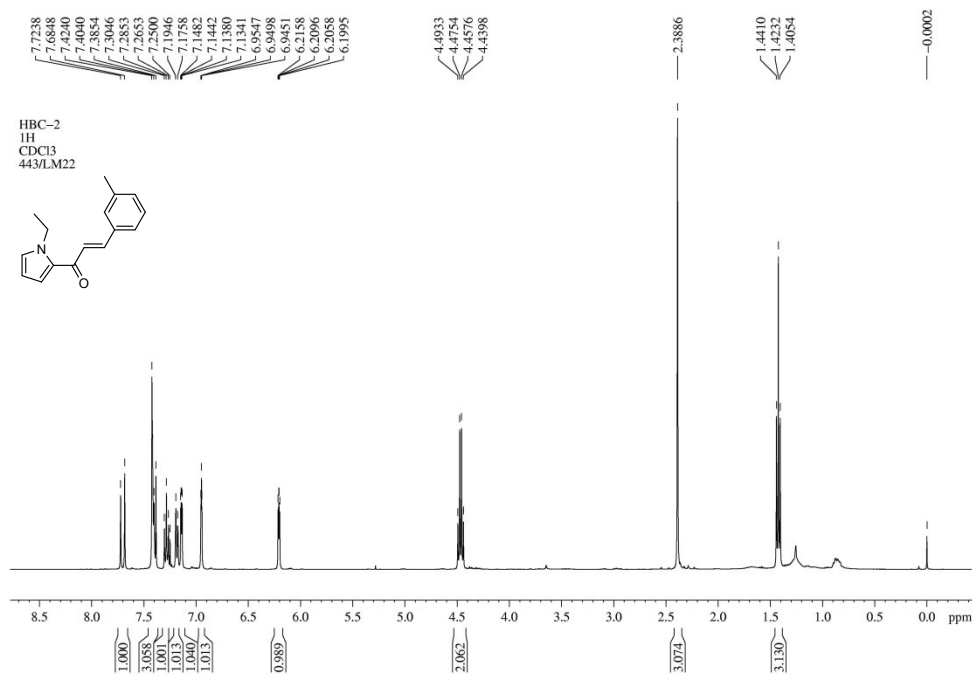

<sup>1</sup>H NMR spectrum of compound **4q**



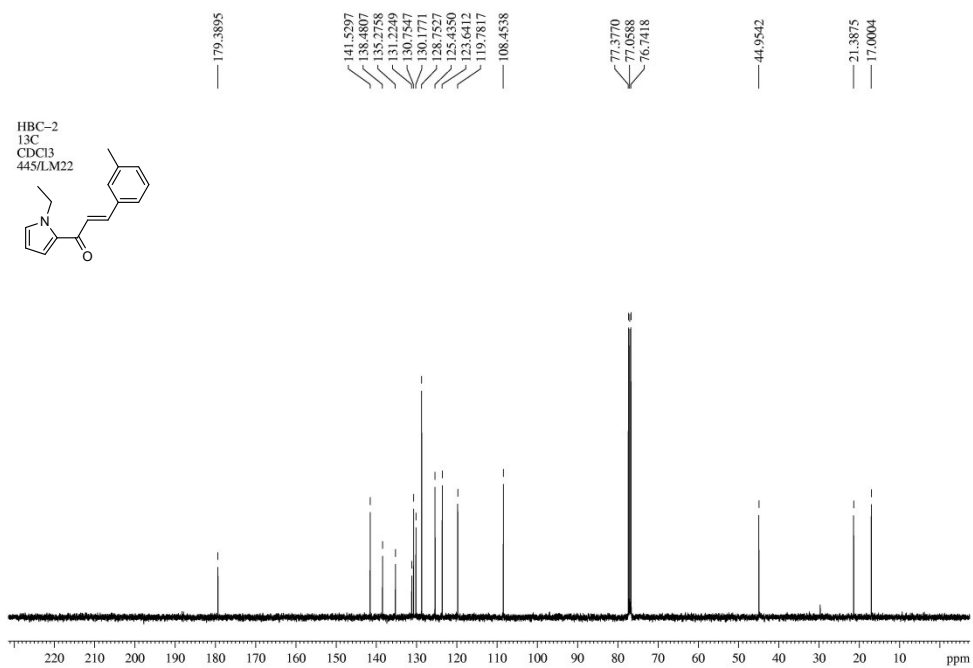

$^{13}\text{C}$  NMR spectrum of compound **4q**

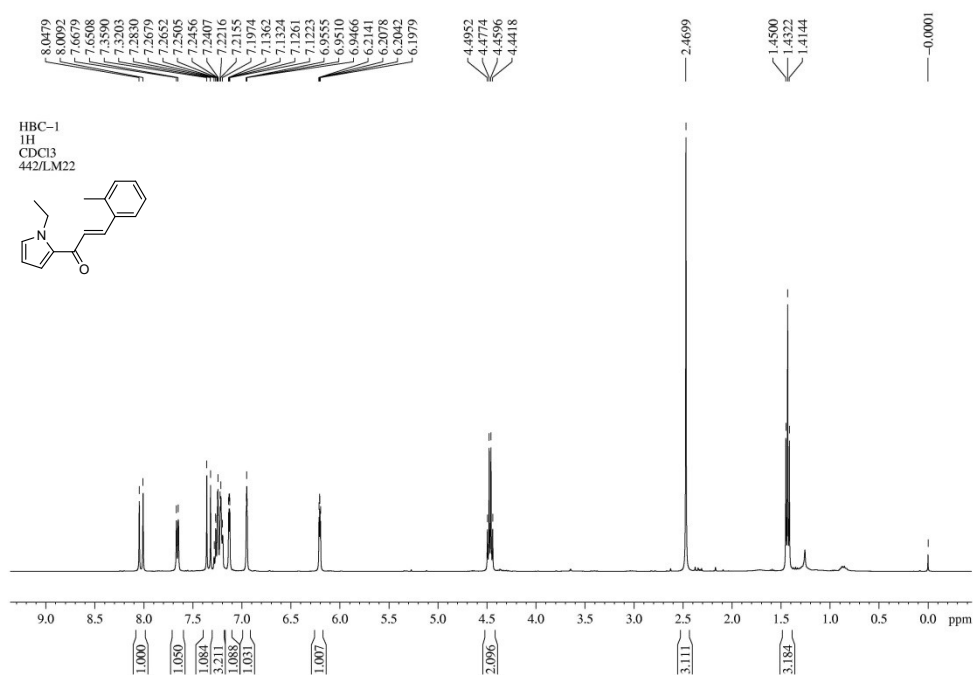

<sup>1</sup>H NMR spectrum of compound **4r**

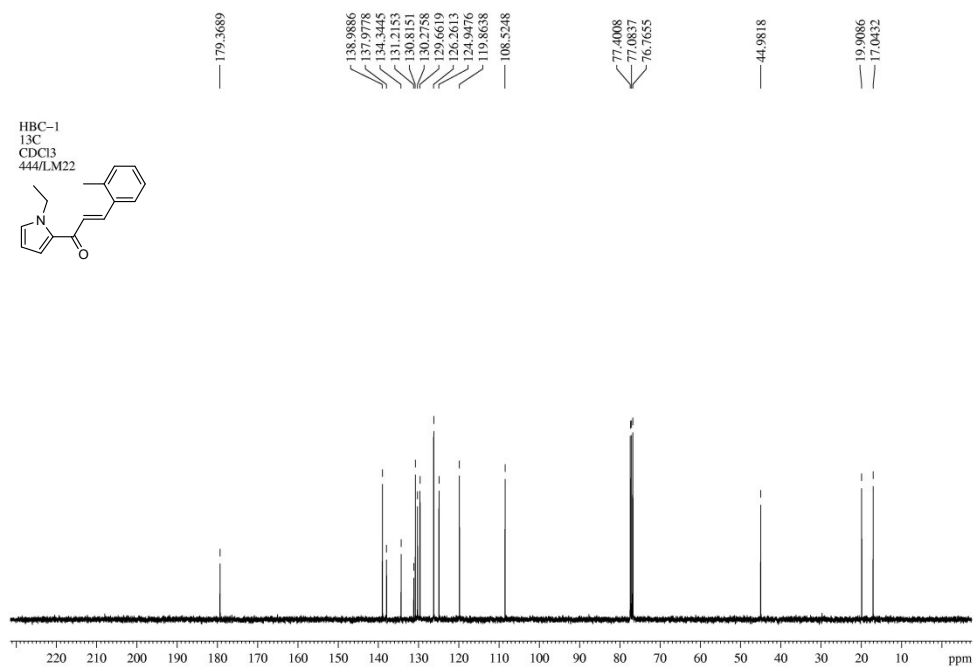

<sup>13</sup>C NMR spectrum of compound **4r**

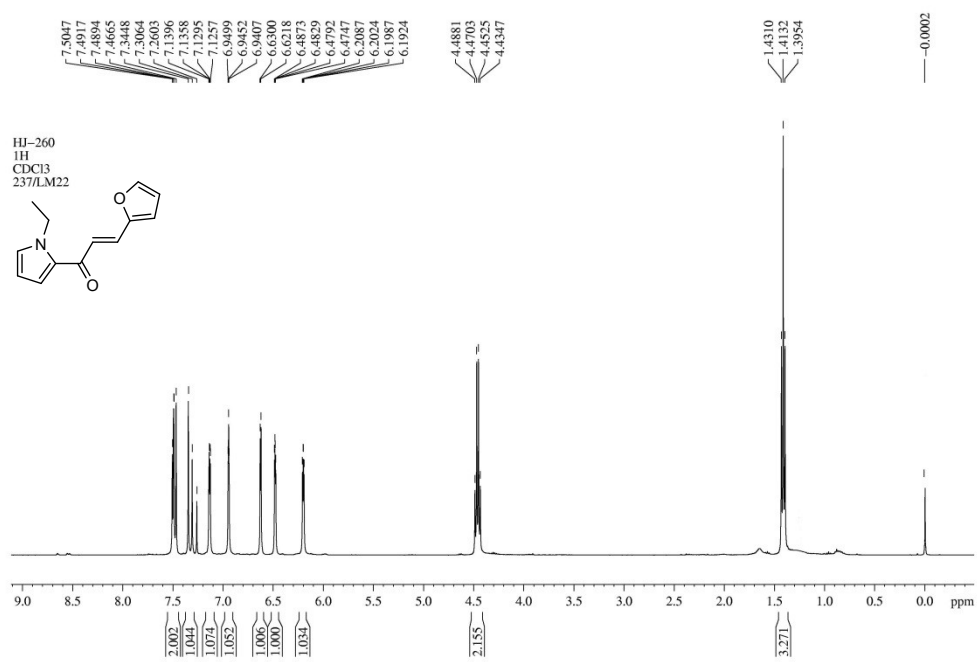

<sup>1</sup>H NMR spectrum of compound **4s**

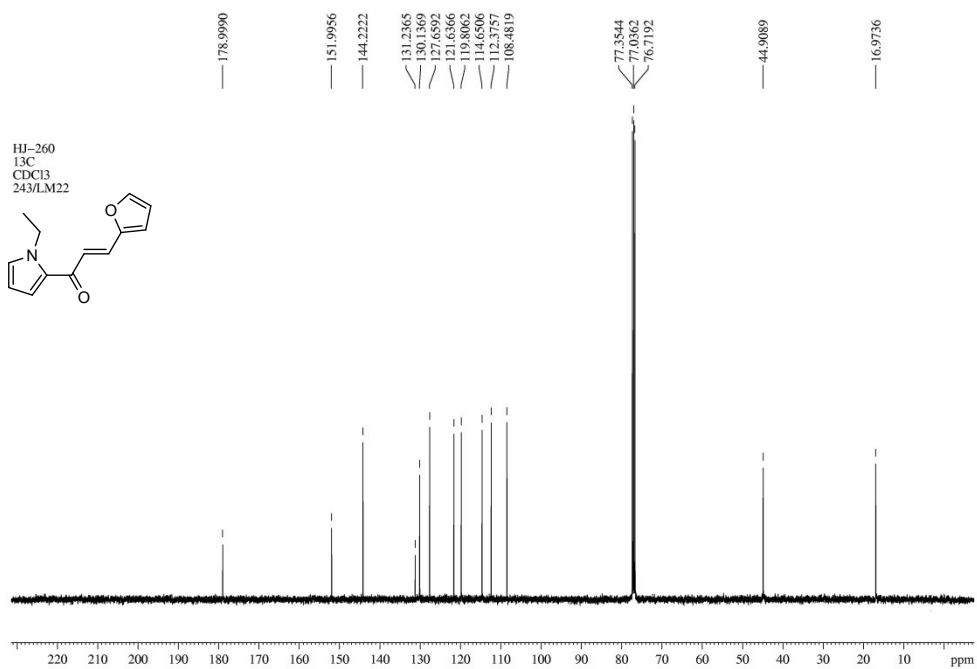

<sup>13</sup>C NMR spectrum of compound **4s**

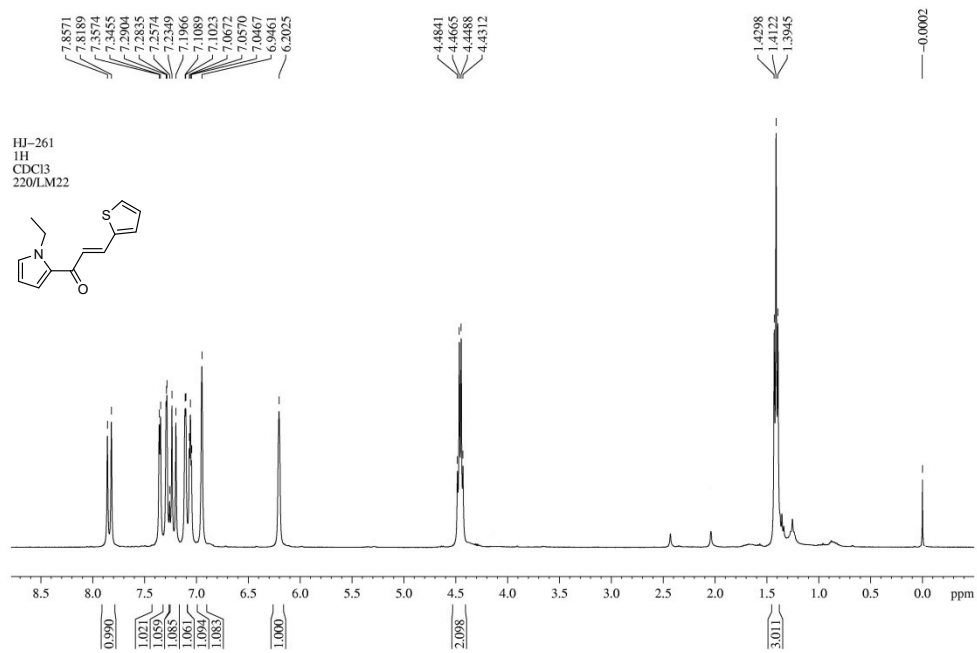

<sup>1</sup>H NMR spectrum of compound **4t**

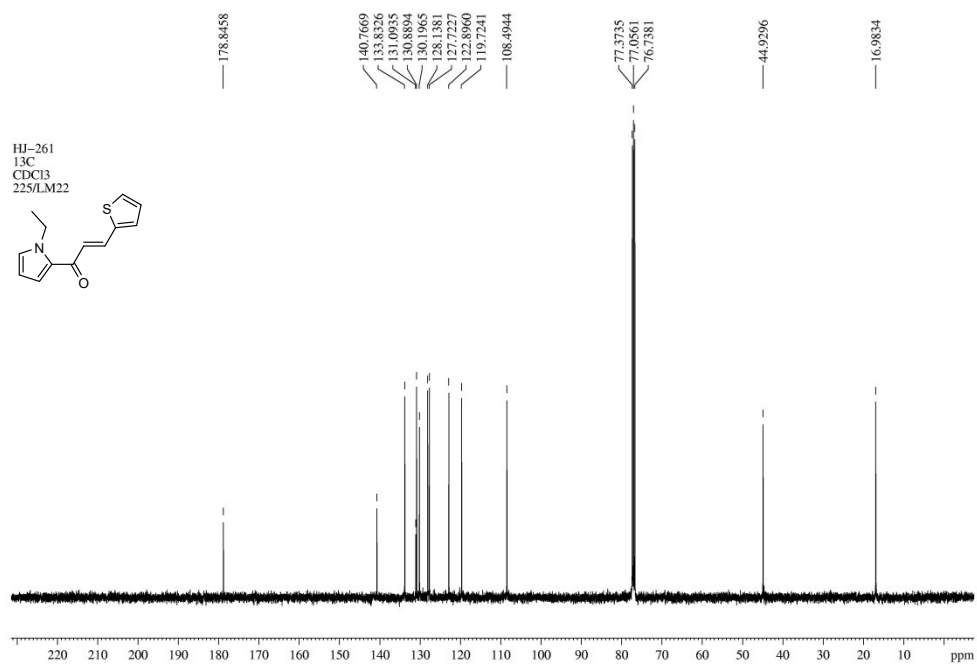

$^{13}\text{C}$  NMR spectrum of compound **4t**

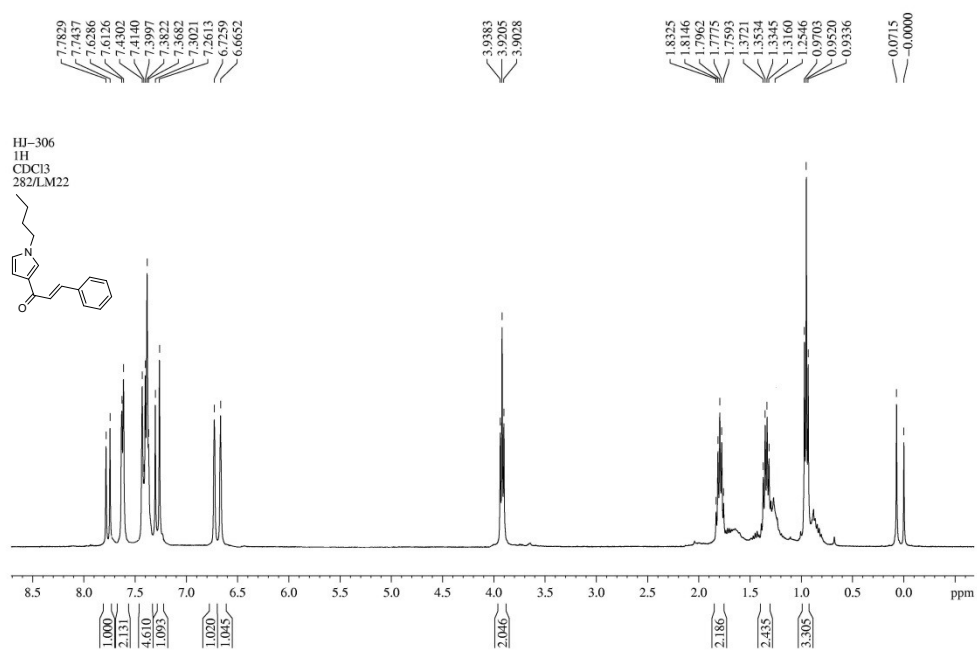

<sup>1</sup>H NMR spectrum of compound **4u**

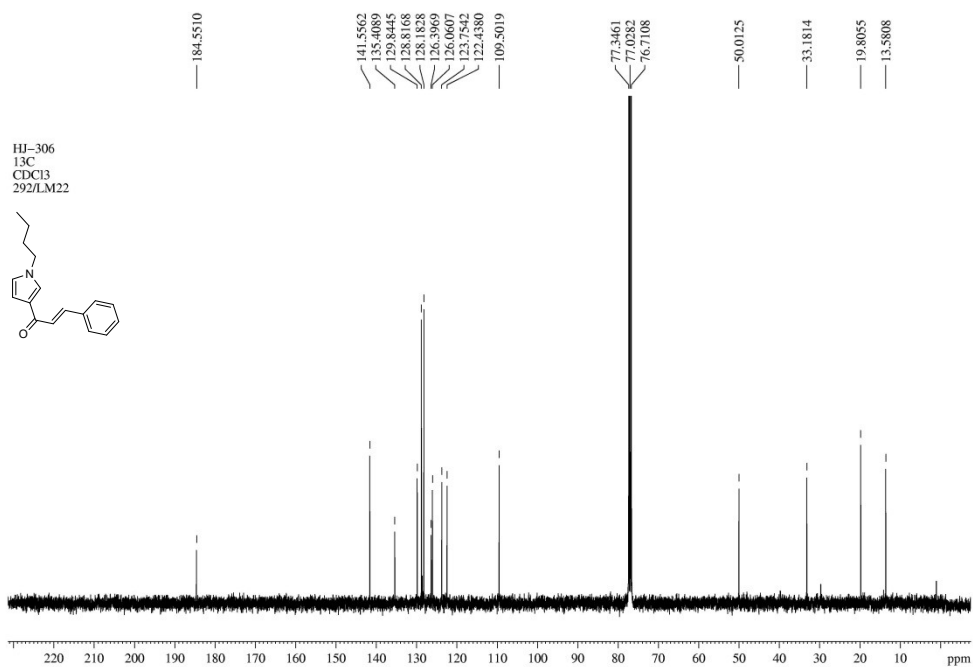

<sup>13</sup>C NMR spectrum of compound **4u**

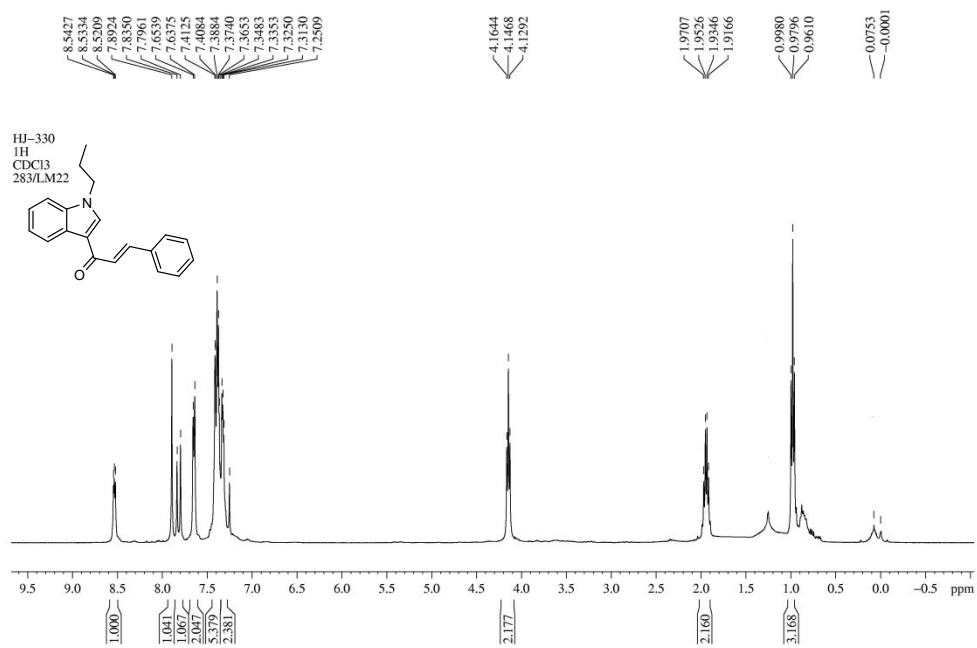

<sup>1</sup>H NMR spectrum of compound **4v**

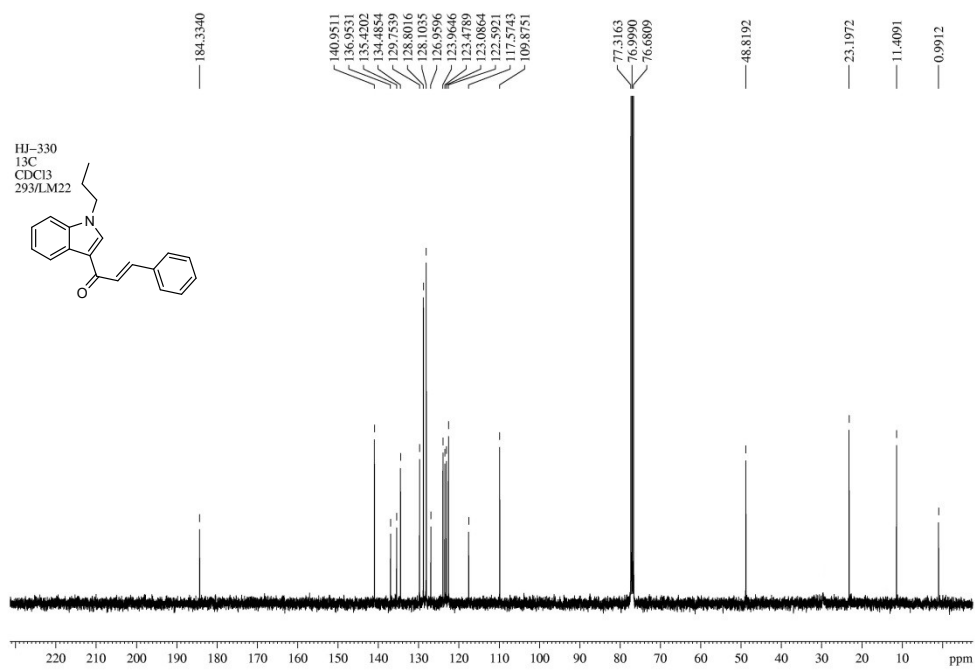

$^{13}\text{C}$  NMR spectrum of compound **4v**
